# 1 ***Temporal codes provide additional category-related information in*** 2 ***object category decoding: a systematic comparison of informative EEG*** 3 ***features***

4  
5 Hamid Karimi-Rouzbahani<sup>1,2,3\*</sup>, Mozghan Shahmohammadi<sup>4</sup>, Ehsan Vahab<sup>5</sup>, Saeed Setayeshi<sup>6</sup>,  
6 Thomas Carlson<sup>7,2</sup>

7 <sup>1</sup>Medical Research Council Cognition and Brain Sciences Unit, University of Cambridge, UK

8 <sup>2</sup>Perception in Action Research Centre and Department of Cognitive Science Macquarie University, Australia

9 <sup>3</sup>Department of Computing, Macquarie University, Australia

10 <sup>4</sup>Department of Computer Engineering, Central Tehran Branch, Islamic Azad University, Iran

11 <sup>5</sup>Department of Computer and Information and Technology Engineering, Qazvin Branch, Islamic Azad University,  
12 Iran

13 <sup>6</sup>Department of Medical Radiation Engineering, Amirkabir University of Technology, Iran

14 <sup>7</sup>School of Psychology, University of Sydney, Australia

15 \* to whom correspondence should be addressed.

## 17 **Abstract**

18 Humans are remarkably efficient at recognizing objects. Understanding how the brain performs object  
19 recognition has been challenging. Our understanding has been advanced substantially in recent years  
20 with the development of multivariate decoding methods. Most start-of-the-art decoding procedures,  
21 make use of the ‘mean’ neural activation to extract object category information, which overlooks  
22 temporal variability in the signals. Here, we studied category-related information in 30 mathematically  
23 distinct features from electroencephalography (EEG) across three independent and highly-varied  
24 datasets using multivariate decoding. While the event-related potential (ERP) components of N1 and  
25 P2a were among the most informative features, the informative original signal samples and Wavelet  
26 coefficients, selected through principal component analysis, outperformed them. The four mentioned  
27 informative features showed more pronounced decoding in the Theta frequency band, which has been  
28 suggested to support feed-forward processing of visual information in the brain. Correlational analyses  
29 showed that the features, which were most informative about object categories, could predict  
30 participants’ behavioral performance (reaction time) more accurately than the less informative features.  
31 These results suggest a new approach for studying how the human brain encodes object category  
32 information and how we can read them out more optimally to investigate the temporal dynamics of the  
33 neural code. The codes are available online at <https://osf.io/wbvpn/>.

## 34 Keywords

35 object category processing; multivariate pattern analysis; multivariate decoding;  
36 electroencephalography (EEG); feature extraction

## 37 Introduction

38 How does the brain encode information about visual object categories? This question has been studied  
39 for many years using different neural recording techniques including invasive neurophysiology (Hung et  
40 al., 2005) and electrocorticography (ECoG; Majima et al., 2014; Watrous et al., 2015; Rupp et al., 2017;  
41 Lie et al., 2009; Miyakawa et al., 2018; Liu et al., 2009), as well as non-invasive methods such as  
42 functional Magnetic Resonance Imaging (fMRI; Haxby et al., 2001), magnetoencephalography (MEG;  
43 Contini et al., 2017; Carlson et al., 2013) and electroencephalography (EEG; Kaneshiro et al., 2016;  
44 Simanova et al., 2010) or a combination of them (Cichy et al., 2014). Despite the recent successes in  
45 neuroimaging in “reading-out” or “decoding” neural representations of semantic object categories, it is  
46 unclear whether conventional decoding analyses leverage the main feature in which the recorded neural  
47 activity reflects object category information. Majority of these studies, rely on the signal’s ‘mean’  
48 amplitude (i.e. average voltage across EEG electrodes), which although informative, but might be a sub-  
49 optimal feature for decoding the object category information from neural activations as it ignores many  
50 subtle fluctuations that can be informative. The use of this potentially sub-optimal feature might thus  
51 hide the true temporal dynamics of object category encoding in the brain, which is still debated in  
52 cognitive neuroscience (Grootswagers et al., 2019; Majima et al., 2014; Karimi-Rouzbahani et al., 2017a;  
53 Behroozi et al. 2016; Isik et al., 2013; Cichy et al., 2014). Here, we quantitatively compare the  
54 information content of a large set of relevant features extracted from EEG activity, which have  
55 successfully provided object category information in previous studies, and evaluate their neural  
56 relevance by measuring how well each feature explains behavioral object recognition performance.

57

58 Multivariate pattern analysis (MVPA), especially multivariate decoding, has become a central method for  
59 the analysis of neuroimaging data (i.e. fMRI, M/EEG), especially in studying neural coding of object  
60 categories (Norman et al., 2006; Tong and Pratte, 2012; Haynes et al., 2015; Grootswagers et al., 2017;  
61 Hebart and Baker, 2018). MVPA incorporates activations across multiple recording sites (i.e.  
62 sensors/electrodes in M/EEG or brain voxels in fMRI) to detect subtle but widespread differences  
63 between patterns of activity across conditions (e.g. object categories). These differences might not be  
64 detectable when comparing univariate brain activations (Norman et al., 2006; Grootswagers et al.,  
65 2017), such as when comparing conventional single-electrode event-related potentials (ERPs) in EEG  
66 (Ambrus et al., 2019). While fMRI provides millimeter-scale spatial resolution allowing us to localize the  
67 brain areas involved in object category processing (Haxby et al., 2001), the recorded activations are  
68 usually modelled using generalized linear regression techniques for both univariate and multivariate  
69 analyses. This statistical modelling approach, which is a prerequisite step when analyzing evoked  
70 activations in fMRI, removes many critical/relevant temporal variabilities (i.e. potential codes) which  
71 have been shown to provide information about visual stimuli when adopting methods with high  
72 temporal resolution such as ECoG, EEG or single cell recording (Eckhorn et al., 1988; Celebrini et al.,  
73 1993; Gollisch and Meister, 2008; Majima et al., 2014; Karimi-Rouzbahani et al., 2017a).

74

75 The temporal resolution of M/EEG allows us to analyze the temporal neural variabilities with millisecond  
76 resolution. Utilizing this property along with the sensitivity of multivariate decoding, the communities of  
77 neuroscience and brain-computer interface (BCI) have gained deeper insights into how we can decode  
78 information about object categories from recorded neural activity. Earlier decoding studies have shown  
79 that individual mean-based ERP components such as N1, P1, P2a and P2b, which refer to arbitrary time  
80 windows in neural time series extracted from 100 to 300 ms post-stimulus onset, could reliably  
81 differentiate visual object categories (Chan et al., 2011). Later studies used Linear Discriminant Analysis  
82 (LDA) classifiers to discriminate up to four object categories utilizing the information content of those  
83 ERP components (Wang et al., 2012), which were later fused (combined) to improve previous decoding  
84 accuracies (Qin et al., 2016). However, these studies and others (Taghizadeh-Sarabi et al., 2015; Torabi  
85 et al., 2017; Wang et al., 2018) overlooked the temporal dynamics of object category encoding which is  
86 determined by within-trial dynamics of neural category processing. To address this issue, researchers  
87 repeated the decoding procedure in short (e.g. 4~50 ms) sliding time windows within trials and revealed  
88 the dynamical profile of category information within trials, which significantly varied by factors such as  
89 task, image presentation time, etc. (Cichy et al., 2014; Kaneshiro et al., 2015; Karimi-Rouzbahani et al.,  
90 2017a; Karimi-Rouzbahani et al., 2017b; Karimi-Rouzbahani et al., 2018; Karimi-Rouzbahani et al., 2019;  
91 Grootswagers et al., 2017; Grootswagers et al., 2019). While providing a temporal account for the neural  
92 object category processing, these time-resolved decoding studies overlooked other possible features of  
93 neural activations that could provide additive object category information. More importantly, these  
94 potentially different temporal profiles might help explaining the behavioral performance more  
95 accurately (Williams et al., 2007; Grootswagers et al., 2018; Woolgar et al., 2019).

96

97 To address this issue, studies have investigated other features of brain activations such as the phase of  
98 the signal (Behroozi et al., 2016; Watrous et al., 2015; Torabi et al., 2017; Wang et al., 2018; Voloh et al.,  
99 2020), signal power across frequency bands (Rupp et al., 2017; Miyakawa et al., 2018; Behroozi et al.,  
100 2016; Majima et al., 2014; Miyakawa et al., 2018, with band-specific contents), time-frequency features  
101 such as Wavelet coefficients (Hatamimajoumerd and Talebpour, 2019; Taghizadeh-Sarabi et al., 2015),  
102 inter-electrode correlations (Majima et al., 2014; Karimi-Rouzbahani et al., 2017a), nonlinear statistical  
103 features (Joshi et al., 2018; Torabi et al., 2017; Stam, 2005). Behroozi et al., (2016) also decoded object  
104 categories using phase patterns in the Delta frequency band (i.e. 1-4 Hz). This finding was later  
105 investigated by another group using Hilbert transform, but found the information in the Theta frequency  
106 band (4-8 Hz; Wang et al., 2018). Other studies found that signal power contained significant category-  
107 related information (Rupp et al., 2017; Majima et al., 2014; Miyakawa et al., 2018). An ECoG  
108 investigation found the information in the synchronization of low- (~2.5 Hz) and high-frequency (~84 Hz)  
109 oscillations (Watrous et al., 2015). Other research showed that, nonlinear statistical features, such as  
110 fractal dimensions, Hjorth complexity, and entropy, which measure the nonlinear structures  
111 (complexity) of signals as an indicator of its information richness, could discriminate object categories  
112 (Torabi et al., 2017; Joshi et al., 2018). These feature-based studies, however, were done on whole-trial  
113 time windows, thus they provided no insight into temporal dynamics.

114

115 Together, these extant literature leaves three unanswered questions about the neural decoding of  
116 object categories. First, which features of the recorded signals are most informative about object

117 categories? Specifically, while several of the above studies have compared multiple features (Chan et al.,  
118 2011; Taghizadeh-Sarabi et al., 2015; Torabi et al., 2016), they focused on specific classes of features  
119 (e.g. ERPs, nonlinear features, etc.), limiting our understanding of how different feature classes compare  
120 to one another. Moreover, some features (e.g. signal power (Behroozi et al., 2016 vs. Wang et al., 2018),  
121 or inter-electrode correlation (Majima et al., 2014 vs. Karimi-Rouzbahani et al., 2017a) have shown  
122 discrepancy across datasets. This suggest that their results might have been driven by category-  
123 irrelevant task features such as attentional load or task demands, which can modulate the neural  
124 activity to a greater level than that evoked by a stimulus (Karimi-Rouzbahani et al., 2019; Karimi-  
125 Rouzbahani et al., 2020b). Therefore, a wider set of features and datasets should be evaluated to  
126 provide more generalizable conclusions. Our prediction is that, as the processing of object categories in  
127 the brain is both spatially and temporally specific to regions and time windows (Cichy et al., 2014), the  
128 information should be detected by features which are spatially and/or temporally specific (e.g. ERP  
129 components and multi-valued features). Our second prediction is that, as the visual object category  
130 processing is dominantly supported by the feed-forward visual streams (Dicarlo et al., 2012; Vaziri-  
131 Pashkam and Xu, 2017), the information should be mainly reflected in the Theta frequency band which  
132 has been previously suggested to support feed-forward flow of visual information in the brain (Bastos et  
133 al., 2015).

134

135 Second, what is the temporal dynamics of object category decoding when using distinct features of  
136 brain activations? Very few studies have investigated the role of features, other than the mean of  
137 activations, in time-resolved decoding procedures (Majima et al., 2014; Stewart et al., 2014; Karimi-  
138 Rouzbahani et al., 2017a). An ECoG study by Majima et al., 2014 showed that inter-electrode correlation  
139 of time samples carried more categorical information than signal power and phase features in 100 and  
140 300-ms wide sliding time windows. We have recently found that inter-electrode correlation of time  
141 samples carried categorical object information, but it was much weaker than the signal variance within  
142 50 ms sliding time windows (Karimi-Rouzbahani et al., 2017a). In time-resolved decoding, we predict  
143 that we can obtain more information using the features which detect informative samples or extract  
144 information from those samples compared to when time-averaging samples as in the conventional  
145 mean-based time-resolved decoding procedures (Grootswagers et al., 2017). The reason for this  
146 prediction is that, although time-averaging of consecutive samples in (short or long) time series  
147 increases the signal-to-noise ratio at the expense of temporal specificity, it will treat all the samples  
148 contained in the window similarly; informative or not. Therefore, informative signal samples and  
149 features can average out (when averaging) or get ignored (when down-sampling) if combined with no-  
150 informative samples. Potential improvement in decoding can allow us to observe and interpret the sub-  
151 threshold neural information, which were ignored because of failing to reach the threshold of  
152 significance for inference.

153

154 Third, which features of brain activations explain behavioral recognition performance? A major open  
155 question in neuroimaging is whether the information that is extracted from neural activity is relevant or  
156 is just epiphenomenal to the target condition. To answer this question, recent efforts have tried to  
157 explain behavioral performance using multivariate decoding accuracies (Williams et al., 2007;  
158 Grootswagers et al., 2018; Woolgar et al., 2019). These studies found that the decoding accuracy

159 obtained by analyzing mean signal activations can predict the behavioral performance in object  
160 recognition (Ritchie, et al., 2015). However, it has remained unknown how (if at all) the decoding  
161 accuracies obtained from other features can explain more variance of the behavioral performance. Our  
162 prediction is that as the more informative features access more of the subtle and overlooked aspects of  
163 neural activation, as reflected in their improved decoding, they should explain the behavioral  
164 performance more accurately.

165

166 To address these questions, we re-implemented a set of 30 features from the literature and  
167 quantitatively evaluated their information about object categories from neural activity on the whole trial  
168 data as well as sliding time windows. We evaluated the features across three independent datasets,  
169 which varied in many parameters including the image set, task, and paradigm. This allowed us to obtain  
170 more generalizable results about the role of each feature in category decoding and explaining behavioral  
171 object recognition performance.

172

## 173 Methods

### 174 Overview of datasets

175 We chose three previously published EEG datasets for this study, which differed across a wide range of  
176 parameters including the recording set-up (e.g. amplifier, number of electrodes, preprocessing steps,  
177 etc.), characteristics of the image-set (e.g. number of categories and exemplars within each category,  
178 colorfulness of images, etc.), paradigm and task (e.g. presentation length, order and the participants' task;  
179 Table 1). All three datasets previously successfully provided object category information from electrical  
180 brain activity using multivariate decoding methods.

181

182 **Dataset 1.** We have previously collected Dataset 1 while participants were briefly (i.e. 50 ms)  
183 presented with gray-scale images from four synthetically-generated 3D object categories (Karimi-  
184 Rouzbahani et al., 2017a). The objects underwent systematic variations in scale, positional periphery, in-  
185 depth rotation and lighting conditions, which made their perception difficult, especially in extreme  
186 variation conditions. Randomly ordered stimuli were presented in consecutive pairs (Figure 1, top row).  
187 The participants' task was unrelated to object categorization- they pressed one of two pre-determined  
188 buttons to indicate if the fixation dots, superimposed on the first and second stimuli, were the  
189 same/different color (2-alternative forced-choice).

190

191 **Dataset 2.** We have collected Dataset 2 in an active experiment, in which participants pressed a  
192 button if the presented object image was from a target category (go/no-go), which was cued at the  
193 beginning of each block of 12 stimuli (Karimi-Rouzbahani et al., 2019; Figure 1, middle row). The object  
194 images, which were cropped from real photographs, were part of the well-stablished benchmark image  
195 set for object recognition developed by Kiani et al., (2007), which has been previously used to extract  
196 object category information from both human and monkey brain using MEG (Cichy et al., 2014), fMRI

197 (Cichy et al., 2014; Kriegeskorte et al., 2008) and single-cell electrophysiology (Kriegeskorte et al., 2008;  
198 Kiani et al., 2007).

199

200 **Dataset 3.** We also adopted another dataset (Dataset 3) which was not collected in our lab. This  
201 dataset was collected by Kaneshiro et al., (2015) on 6 sessions for each participant, from which we used  
202 the first session only, as it could represent the whole dataset- other sessions were repetitions of the first  
203 session and aimed at increasing the signal to noise ratio by repeating the presentation of the same stimuli.  
204 The EEG data was collected during passive viewing (participants had no task; Figure 1, bottom row) of 6  
205 categories of objects with stimuli chosen from Kiani et al. (2007) as explained above. We used a pre-  
206 processed (i.e. band-pass-filtered in the range 0.03 to 50 Hz) version of the dataset which was available  
207 online<sup>1</sup>.

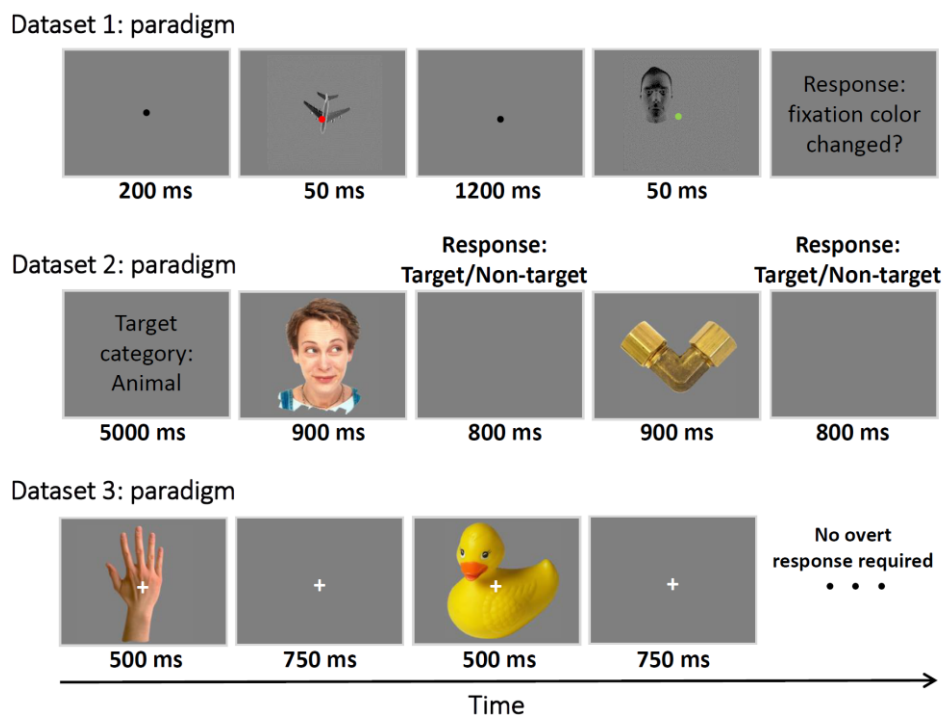

**Figure 1.** Paradigms of the datasets used in this study. Dataset 1 (top row) presented two consecutive object images with a fixation dot. Participants' task was to indicate if the fixation dot was the same or different colors across the object images (passive task). Dataset 2 (middle row) presented objects from the target and non-target categories in sequences of 12 images. Participant's task was to indicate, for each image, if it was from the target/non-target category (active task). Dataset 3 (bottom row), presented sequences of object images from 6 different categories. Participants did not have any specific task, except for looking at the center of object images (no overt task). Please see the details of the datasets in the relevant references cited in Table 1.

208

209 All three datasets were collected at a sampling rate of 1000 Hz. For Datasets 1 and 2, only the trials which  
210 led to correct responses by participants, were used in the analyses. Each dataset consisted of data from

<sup>1</sup> <https://purl.stanford.edu/tc919dd5388>

211 10 participants. Each object category in each dataset included 12 exemplars. To make the three datasets  
212 as consistent as possible, we pre-processed them differently from their original papers. Specifically, the  
213 band-pass filtering range of Dataset 3 was 0.03 to 50 Hz, and we did not have access to the raw data to  
214 increase the upper bound to 200 Hz. Datasets 1 and 2 were band-pass-filtered in the range from 0.03 to  
215 200 Hz before the data was split into trials. We used finite-impulse-response filters with 12 dB roll-off per  
216 octave for band-pass filtering of Datasets 1 and 2 and when evaluating the sub-bands of the three  
217 datasets. We did not remove artifacts (e.g. eye-related and movement-related) from the signals, as we  
218 and others have shown that sporadic artifacts have minimal effect in multivariate decoding (Grootswagers  
219 et al., 2017). To increase signal to noise ratios in the analyses, each unique stimulus had been presented  
220 to the participants 3, 6 and 12 times in Datasets 1, 2, 3, respectively. Trials were defined in the time  
221 window from 200 ms before to 1000 ms after the stimulus onset to cover most of the range of event-  
222 related neural activations. The average pre-stimulus (-200 to 0 ms relative to the stimulus onset) signal  
223 amplitude was removed from each trial of the data. For more information about each dataset see Table  
224 1 and the references to their original publications.

225

226 **Table 1.** Details of the three datasets used in the study.

| Dataset                           | # electrodes | Band-pass filtering | Notch filtering | # object categories | # stimulus repetition | Stimulus presentation time | Stimulus size (periphery) | Task                               | Participants' accuracy |
|-----------------------------------|--------------|---------------------|-----------------|---------------------|-----------------------|----------------------------|---------------------------|------------------------------------|------------------------|
| 1 Karimi-Rouzbahani et al., 2017a | 31           | 0.03-200 Hz         | 50 Hz           | 4                   | 3                     | 50 ms                      | 2~13.5° (0.7~8.8°)        | Color matching (passive)           | %94.68                 |
| 2 Karimi-Rouzbahani et al., 2019  | 31           | 0.03-200 Hz         | 50 Hz           | 4                   | 6                     | 900 ms                     | 8° × 8° (0)               | Object category detection (active) | %94.65                 |
| 3 Kaneshiro et al., 2017          | 124          | 0.03-50 Hz          | No              | 6                   | 12                    | 500 ms                     | 7.0° × 6.5° (0)           | No task (fixation)                 | N/A                    |

227

## 228 Features

229 EEG signals are generated by inhibitory and excitatory post-synaptic potentials of the cortical neurons.  
230 These potentials extend to the scalp surface and are recorded through electrodes as amplitudes of  
231 voltage in units of microvolts. Researchers have been using different aspects of these voltage recordings  
232 to obtain meaningful information about human brain processes. Below we explain the mathematical  
233 formulation of each individual feature used in this study. We also provide brief information about  
234 underlying neural mechanisms which lead to the information content provided by those EEG features.  
235 We classified the features into five arbitrary classes based on their mathematical similarity to simplify  
236 the presentation of the results and their interpretations. The five classes consist of Moment,  
237 Complexity, ERP, Frequency-domain and Multi-valued features. However, the classification of the  
238 features is not strict and the features might be classified based on other criteria and definitions. For  
239 example, complexity itself has different definitions (Tononi et al., 1998), such as degree of randomness,  
240 or degrees of freedom in a large system of interacting elements. Therefore, each definition may exclude  
241 or include some of our features in the class. It is of note that, we only used the features which were  
242 previously used to decode categories of evoked potentials from EEG signals mainly through multivariate

243 decoding methods. Nonetheless, there are definitely other features, especially, those extracted from  
244 EEG time series collected during long-term monitoring of human neural representations in health and  
245 disorder. In presenting the features' formulations, we avoided repeating the terms repeatedly from the  
246 first feature to the last one. Therefore, the reader might need to go back a few steps to find the  
247 definitions of terms.

248

## 249 **Moment features**

250 These features are the most straightforward and intuitive features from which we might be able to  
251 extract information about neural processes. Mean, Variance, Skewness and Kurtosis are the 1<sup>st</sup> to the 4<sup>th</sup>  
252 moments of EEG time series and can provide information about the shape of the signals and their  
253 deviation from stationarity which is the case in evoked potentials (Rasoulzadeh et al., 2016; Wong et al.,  
254 2006). These moments have been shown to be able to differentiate visually evoked responses  
255 (Pouryazdian and Erfaninan, 2010; Alimardani et al., 2018).

### 256 *Mean*

257 Mean amplitude of an EEG signal changes in proportion to the neural activation of the brain. It is by far  
258 the most common feature of the recorded neural activations used in analyzing brain states and cognitive  
259 processes either in univariate and multivariate analysis (Vidal et al., 2010; Hebart and Baker, 2017;  
260 Grootswagers et al., 2017; Karimi-Rouzbahani et al., 2019). In EEG, the brain activation is reflected as the  
261 amplitude of the recorded voltage across each electrode and the reference electrode at specific time  
262 points. To calculate the Mean feature, which is the first moment in statistics, the sample mean is  
263 calculated for recorded EEG time series as:

$$264 \quad \bar{x} = \frac{1}{N} \sum_{t=1}^N x_t \quad (1)$$

265 where  $\bar{x}$  is the mean of the  $N$  time samples contained in the time series and  $x_t$  refers to the amplitude of  
266 the recorded sample at time point  $t$ .  $N$  can be as small as unity as in the case of time-resolved EEG analysis  
267 (Grootswagers et al., 2017) or as large as required by the analysis. In this study, we set  $N = 50$  and  $N =$   
268  $1000$  for the time-resolved and whole-trial decoding analyses, respectively.

269

### 270 *Median*

271 Compared to the Mean feature, Median is less susceptible to outliers (e.g. spikes) in the time series, which  
272 might not come from neural activations but rather from artifacts caused by the recording hardware,  
273 preprocessing, eye-blinks, etc. Provided that the signal probability distribution is  $P$ , signal median  $m$ , is  
274 calculated so that it meets the following conditions:

$$275 \quad P(x > m) \geq \frac{1}{2} \text{ and } P(x \leq m) \geq \frac{1}{2} \quad (2)$$

276

### 277 *Variance*

278 Variance of an EEG signal is one of the best indicators showing how much the signal is deviated from  
279 stationarity i.e. deviated from its original baseline statistical properties (Wong et al., 2006). It is a measure  
280 of signal variability, has been shown to squeeze upon the stimulus onset as a result of neural co-activation



281 (Churchland et al., 2010) and has provided information about object categories in a recent EEG decoding  
282 study (Karimi-Rouzbahani et al., 2017a). Variance is calculated as:

$$283 \quad \sigma^2 = \frac{1}{N} \sum_{t=1}^N (x_t - \bar{x})^2 \quad (3)$$

284

### 285 *Skewness*

286 While Variance is silent about the direction of the deviation, Skewness, which is the third signal moment,  
287 measures the degree of asymmetry in the signal's probability distribution. In symmetric distribution (i.e.  
288 when samples are symmetrically around the mean) skewness is zero. Positive and negative skewness  
289 indicates right- and left-ward tailed distribution, respectively. As the visually evoked ERP responses usually  
290 tend to be asymmetrically deviated in either positive or negative direction, even after baseline correction  
291 (Mazaheri and Jensen, 2008), we assume that Skewness should provide information about the visual  
292 stimulus if each category modulates the deviation of the samples differentially. Skewness is calculated as:

$$293 \quad \gamma_1 = \frac{1}{N} \sum_{t=1}^N \left( \frac{x_t - \bar{x}}{\sigma} \right)^3 \quad (4)$$

294

### 295 *Kurtosis*

296 Kurtosis reflects the degree of 'tailedness' or 'flattedness' of the signal's probability distribution.  
297 Accordingly, the more heaviness in the tails, the less value of the Kurtosis and vice versa. Based on  
298 previous studies, Kurtosis has provided distinct representations corresponding to different classes of  
299 visually evoked potentials (Alimardani et al., 2018; Pourydzian and Erfaninan, 2010). We test to see if  
300 Kurtosis plays a more generalized role in information coding e.g. coding of semantic aspects of visual  
301 information as well. It is the fourth standardized moment of the signal defined as:

$$302 \quad Kurt = \frac{1}{N} \sum_{t=1}^N \left( \frac{x_t - \bar{x}}{\sigma} \right)^4 \quad (5)$$

303

### 304 *Complexity features*

305 There can potentially be many cases in which simple moment statistics such as Mean, Median, Variance,  
306 Skewness and Kurtosis provide equal values for distinct time series (e.g. A: 10, 20, 10, 20, 10, 20, 10, 20  
307 vs. B: 20, 20, 20, 10, 20, 10, 10, 10) for both of which the five above-mentioned features provide equal  
308 results. Therefore, we need more complex and possibly nonlinear measures which can capture subtle  
309 but significant differential patterns across distinct time series. The analysis of nonlinear signal features  
310 has recently been growing, following the findings showing that EEG reflects weak but significant  
311 nonlinear structures (Stam, 2005; Stepien, 2002). Importantly, many studies have shown that the  
312 complexity of EEG time series can significantly alter during cognitive tasks such as visual (Bizas et al.,  
313 1999) and working memory tasks (Sammer et al., 1999; Stam, 2000). Therefore, it was necessary to  
314 evaluate the information content of nonlinear features for our multivariate decoding of object  
315 categories. As mentioned above, the grouping of these nonlinear features as "complexity" here is not  
316 strict and the features included in this class are those which capture complex and nonlinear patterns  
317 across time series. Although the accurate detection of complex and nonlinear patterns generally need  
318 more time samples compared to linear patterns (Procaccia, 1988), it has been shown that nonlinear

319 structures can be detected from short EEG time series (i.e. through fractal dimensions; Preißl et al.,  
320 1997). Moreover, to ensure that we do not miss the detection of nonlinear structures as a result of the  
321 short time series, we extracted the nonlinear features from the time-resolved (50 samples) and the  
322 whole-trial data (1000 samples).

323

### 324 *Lempel-Ziv complexity (LZ Cmplx)*

325 Lempel-Ziv complexity measures the complexity of a time series (Lempel et al., 1976). Basically, the  
326 algorithm counts the number of unique sub-sequences within a larger binary sequence. Accordingly, a  
327 sequence of samples with a certain regularity does not lead to a large LZ complexity. However, the  
328 complexity generally grows with the length of the sequence and its irregularity. In other words, it  
329 measures the generation rate of new patterns along a digital sequence. In a comparative work, it has  
330 been shown that, compared to many other frequency metrics of time series (e.g. noise power,  
331 stochastic variability, etc.), LZ complexity has the unique feature of providing a scalar estimate of the  
332 bandwidth of a time series and the harmonic variability in quasi-periodic signals (Aboy et al., 2006). It is  
333 widely used in biomedical signal processing and has provided successful results in the decoding of visual  
334 stimuli from neural responses in primary visual cortices (Szczepański et al., 2003). We used the code by  
335 Quang Thai<sup>2</sup> implemented based on “exhaustive complexity” which is considered to provide the lower  
336 limit of the complexity as explained by Lempel et al. (1976). We compared the results obtained from this  
337 implementation to two other implementations, which provided identical results. We used the signal  
338 median as a threshold to convert the signals into binary sequences for the calculation of LZ complexity.  
339 The LZ complexity provided a single value for each signal time series.

340

### 341 *Fractal dimension*

342 In signal processing, fractal is an indexing technique which provides statistical information determining  
343 the complexity of the time series. A higher fractal value indicates more complexity for a sequence as  
344 reflected in more nesting of repetitive sub-sequences at all scales. Fractal dimensions are widely used to  
345 measure two important attributes: self-similarity and the shape of irregularity. A growing set of studies  
346 have been using fractal analyses for the extraction of information about semantic object categories (such  
347 as living and non-living categories of visual objects; Ahmadi-Pajouh et al., 2018; Torabi et al., 2017) as well  
348 as simple checkerboard patterns (Namazi et al., 2018) from visually evoked potentials. These results  
349 support the coding of visual information in EEG signal patterns through the modulation of their nonlinear  
350 structure. In this study, we implemented two of the common methods for the calculation of fractal  
351 dimensions of EEG time series, which have been previously used to extract information about object  
352 categories as explained below. We used the implementations by Jesús Monge Álvarez<sup>3</sup> after verifying it  
353 against other implementations.

#### 354 • **Higuchi’s fractal dimension (Higuchi FD)**

---

<sup>2</sup> [https://www.mathworks.com/matlabcentral/fileexchange/38211-calc\\_lz\\_complexity](https://www.mathworks.com/matlabcentral/fileexchange/38211-calc_lz_complexity)

<sup>3</sup> <https://ww2.mathworks.cn/matlabcentral/fileexchange/50290-higuchi-and-katz-fractal-dimension-measures>

355 In this method (Higuchi et al., 1988), a set of sub-sequences  $x_k^m$  is generated in which  $k$  and  $m$  refer to  
 356 the step size and initial value, respectively. Then, the length of this fractal dimension is calculated as:

$$357 \quad L_k^m = \frac{\left\{ \left[ \sum_{i=1}^{\lfloor \frac{N-m}{k} \rfloor} |x_{(m+ik)} - x_{(m+(i-1).k)}| \right]^{\frac{N-1}{\lfloor \frac{N-m}{k} \rfloor . k}} \right\}}{k} \quad (6)$$

358 where  $\frac{N-1}{\lfloor \frac{N-m}{k} \rfloor . k}$  is the normalization factor. The length of the fractal curve at step size of  $k$  is  
 359 calculated by averaging  $k$  sets of  $L_k^m$ . Finally, the resultant average will be proportional to  $k^{-D}$  where  
 360  $D$  is the fractal dimension. We set the free parameter of  $k$  equal to half the length of signal time series in  
 361 the current study.

362 • **Katz's fractal dimension (Katz FD)**

363 We also calculated fractal dimension using the Katz's method (Katz, 1988) as it showed a significant  
 364 amount of information about object categories in a previous study (Torabi et al., 2017). The fractal  
 365 dimension ( $D$ ) is calculated as:

$$366 \quad D = \frac{\log_{10}\left(\frac{L}{a}\right)}{\log_{10}\left(\frac{d}{a}\right)} = \frac{\log_{10}r}{\log_{10}\left(\frac{d}{L}\right) + \log_{10}r} \quad (7)$$

367 where  $L$  and  $a$  refer to the sum and average of the consecutive signal samples, respectively. Also  $d$  refers  
 368 to the maximum distance between first sample of the signal and  $i^{th}$  sample of the signal which has the  
 369 maximum distance from first sample as:

$$370 \quad L = \sum_{i=2}^N |x_i - x_{i-1}| \quad (8)$$

$$371 \quad d = \max(\text{distance}(1, i)) \quad (9)$$

$$372 \quad r = L/a \quad (10)$$

373

374 *Hurst exponent (Hurst Exp)*

375 Hurst exponent is widely used to measure the long-term memory in a time-dependent random variable  
 376 such as biological time series (Racine, 2011). In other words, it measures the degree of interdependence  
 377 across samples in the time series and operates like an autocorrelation function over time. Hurst values  
 378 between 0.5 and 1 suggest consecutive appearance of high signal values on large time scales while values  
 379 between 0 and 0.5 suggest frequent switching between high and low signal values. Values around 0.5  
 380 suggest no specific patterns among samples of a time series. It is defined as an asymptotic behavior of a  
 381 rescaled range as a function of the time span of the time series defined as:

$$382 \quad E \left[ \frac{\max(z_1, z_2, \dots, z_N) - \min(z_1, z_2, \dots, z_N)}{\sqrt{\frac{1}{N} \sum_{t=1}^N (x_t - \bar{x})^2}} \right] = C \cdot N^H \text{ as } N \rightarrow \infty \quad (11)$$

383

$$384 \quad z_t = \sum_{i=1}^t y_i ; t = 1, \dots, N \quad (12)$$

$$385 \quad y_t = x_t - \bar{x} \quad (13)$$

386 where  $E$  is the expected value,  $C$  is a constant and  $H$  is the Hurst exponent (Racine, 2011). We used the  
387 open-source implementation of the algorithm<sup>4</sup>, which has also been used previously for the decoding of  
388 object category information in EEG (Torabi et al., 2017). We compared two more implementations all of  
389 which provided identical results.

390

### 391 *Entropy*

392 Entropy can measure the perturbation in time series. A higher value for entropy suggests a higher  
393 irregularity in the given time series. Precise calculation of entropy usually requires considerable number  
394 of samples and is also sensitive to noise. Here we used two methods for the calculation of entropy, each  
395 of which has its advantages over the other.

#### 396 • **Approximate entropy (Aprpx Ent)**

397 Approximate entropy was initially developed to be used for medical data analysis (Pincus and Huang,  
398 1992), such as heart rate, and then was extended to other areas such as brain data analysis. It has the  
399 advantage of requiring a low computational power which makes it perfect for real-time applications on  
400 low sample sizes ( $N < 50$ ). However, the quality of this entropy method is impaired on lower length of the  
401 data. This metric detects changes in episodic behavior which are not represented by peak occurrences or  
402 amplitudes (Pincus and Huang, 1992). We used an open-source code<sup>5</sup> for calculating approximate  
403 entropy. We compared the results obtained from this implementation to one other implementation,  
404 which provided identical results. We set the embedded dimension and the tolerance parameters to 2 and  
405 20% of the standard deviation of the data respectively, to roughly follow a previous study (Shourie et al.,  
406 2014) which compared approximate entropy in visually evoked potentials and found differential effects  
407 across artist vs. non-artist participants when looking at paintings.

#### 408 • **Sample entropy (Sample Ent)**

409 Sample entropy, which is a refinement of the approximate entropy, is frequently used to calculate  
410 regularity of biological signals (Richman et al., 2000). Basically, it is the negative natural logarithm of the  
411 conditional probability that two sequences (subset of samples), which are similar for  $m$  points remain  
412 similar at the next point. A lower sample entropy also reflects a higher self-similarity in the time series. It  
413 has two main advantages to the approximate entropy: it is less sensitive to the length of the data and is  
414 simpler to implement. However, it does not focus on self-similar patterns in the data. We used the Matlab  
415 'entropy' function for the implementation of this feature, which has already provided category  
416 information in a previous study (Torabi et al., 2017). See (Richman et al., 2000; Subha et al., 2010) for the  
417 details of the algorithm.

418

### 419 *Autocorrelation (Autocorr)*

420 Autocorrelation determines the degree of similarity between the samples of a given time series and a  
421 time-lagged version of the same series. It detect periodic patterns in signal time series, which is an integral

---

<sup>4</sup> <https://www.mathworks.com/matlabcentral/fileexchange/9842-hurst-exponent>

<sup>5</sup> <https://www.mathworks.com/matlabcentral/fileexchange/32427-fast-approximate-entropy>

422 part of EEG time series. Therefore, following recent successful attempts in decoding neural information  
423 using the autocorrelation function from EEG signals (Wairagkar et al., 2016), we evaluated the information  
424 content of the autocorrelation function in decoding visual object categories. As neural activations reflect  
425 many repetitive patterns across time, the autocorrelation function can quantify the information contents  
426 of those repetitive patterns. Autocorrelation is calculated as:

$$427 \quad R(\tau) = \frac{1}{(N-\tau)\sigma^2} \sum_{t=1}^{N-\tau} (x_t - \bar{x})(x_{t+\tau} - \bar{x}) \quad (14)$$

428  
429 where  $\tau$  indicates the number of lags in samples of the shifted signal. A positive value for autocorrelation  
430 indicates a strong relationship between the original time series and its shifted version, whereas a negative  
431 autocorrelation refers to an opposite pattern between them. Zero autocorrelation indicates no  
432 relationship between the original time series and its shifted version. In this study, we extracted  
433 autocorrelations for 30 consecutive lags ( $\tau=1, 2, \dots, 30$ ) used their average in classification. Please note  
434 that each lag refers to 1 ms as the data was sampled at 1000 Hz.

435

#### 436 *Hjorth parameters*

437 Hjorth parameters are descriptors of statistical properties of signals introduced by Hjorth (1970). These  
438 parameters are widely used in EEG signal analysis for feature extraction across a wide set of applications  
439 including visual recognition (Joshi et al., 2018; Torabi et al., 2017). These features consist of Activity,  
440 Mobility and Complexity as defined below. As the Activity parameter is equivalent to signal Variance,  
441 which we already had in the analyses, we did not repeat it.

#### 442 • **Hjorth complexity (Hjorth Cmp)**

443 It determines the variation in time series' frequency by quantifying the similarity between the signal and  
444 a pure sine wave leading to a value of 1 in case of perfect match. In other words, values around 1 suggest  
445 lower complexity for a signal. It is calculated as:

$$446 \quad \text{Complexity} = \frac{\text{Mobility} \left( \frac{dx_t}{dt} \right)}{\text{Mobility} (x_t)} \quad (15)$$

#### 447 • **Hjorth mobility (Hjorth Mob)**

448 It determines the proportion of standard deviation of the power spectrum as is calculated below, where  
449 *var* refers to the signal variance.

$$450 \quad \text{Mobility} = \sqrt{\frac{\text{var} \left( \frac{dx_t}{dt} \right)}{\text{var}(x_t)}} \quad (16)$$

451

#### 452 *ERP components (N1, P1, P2a and P2b)*

453 An ERP is a measured brain response to a specific cognitive, sensory or motor event that provides an  
454 approach to study the correlation between the event and neural processing. According to the latency and  
455 amplitude, ERP is split into specific sub-windows called components. Here, we extracted ERP components

456 by calculating mean of signals in specific time windows to obtain the P1 (80 to 120 ms), N1 (120 to 200  
457 ms), P2a (150 to 220 ms) and P2b (200 to 275 ms) components, which were shown previously to provide  
458 significant amounts of information about visual object and face processing in univariate (Rossion et al.,  
459 2000; Rousselet et al., 2007) and multivariate analyses (Chan et al., 2011; Jadidi et al., 2016; Wang et al.,  
460 2012).

461

## 462 Frequency-domain features

463 Frequency-domain analysis, which is the conventional and yet one of the most powerful approaches in  
464 EEG data analysis, generally inform us of the distribution of signal power over frequency bands through  
465 the use of variety of frequency-domain features such as Fourier coefficients, etc. Therefore, motivated  
466 by previous studies showing signatures of object categories in the frequency domain (Behroozi et al.,  
467 2016; Rupp et al., 2017; Iranmanesh and Rodriguez-Villegas, 2017; Joshi et al., 2018; Jadidi et al., 2016)  
468 and the reflection of temporal coding of visual information in the frequency domain (Eckhorn et al.,  
469 1988), we also extracted frequency-domain features to see if they provide additional category-related  
470 information to time-domain features. There are limitations to our frequency analysis as follow. While  
471 the whole-trial analysis can provide results that we can compare with previous studies, the evoked EEG  
472 potentials are likely nonstationary (i.e. their statistical properties change across time), potentially  
473 biasing the frequency features towards the most dominant frequency components and hiding the subtle  
474 (i.e. high-frequency) fluctuations of the signal. On the other hand, while the time-resolved analysis,  
475 which is done in 50ms sliding time windows, enable us to detect the time-varying characteristics in the  
476 frequency domain, it will only incorporate frequencies lower than 25 Hz according to the Nyquist  
477 theorem. Despite these limitations, we still extracted and analyzed the frequency-domain features as  
478 below.

479

## 480 Signal power (Signal Pw)

481 Power spectrum density (PSD) represents the intensity or the distribution of the signal power into its  
482 constituent frequency components. This feature was motivated by previous studies showing associations  
483 between aspects of visual perception and certain frequency bands (Rupp et al., 2017; Behroozi et al.,  
484 2016; Majima et al., 2014). According to the Fourier analysis, signals can be broken into its constituent  
485 frequency components or a spectrum of frequencies in a specific frequency range. Here, we calculated  
486 signal power using the PSD as (17).

$$487 \quad \tilde{S}_{xx}(w) = \frac{(\Delta t)^2}{T} \left| \sum_{n=1}^N x_n e^{-iwn\Delta t} \right|^2 \quad (17)$$

488 where  $x_n = x_{n\Delta t}$  is signal sampled at a rate of  $T = \frac{1}{\Delta t}$  and  $w$  is the frequency at which the signal power  
489 is calculated. As signal power is a relatively broad term, including the whole power spectrum of the signal,  
490 we also extracted a few more parameters from the signal frequency representation, to see what specific  
491 features in the frequency domain (if any) can provide information about object categories.

492

493 *Mean frequency (Mean Freq)*

494 Motivated by the successful application of mean and median frequencies in the analysis of EEG signals  
495 and their relationship to signal components in the time domain (Intrilligator and Polich, 1995;  
496 Abootalebi et al., 2009), we extracted these two features from the signal power spectrum to obtain a  
497 more detailed insight into the neural dynamics of category representations. Mean frequency is the  
498 average of the frequency components available in a signal. Assume a signal consisting of two frequency  
499 components of  $f_1$  and  $f_2$ . The mean frequency of this signal is  $f_{mean} = \frac{f_1 + f_2}{2}$ . Generally, the mean  
500 normalized (by the intensity) frequency is calculated using the following formula:

501 
$$f_{mean} = \frac{\sum_{i=0}^n l_i f_i}{\sum_{i=0}^n l_i} \quad (18)$$

502 where  $n$  is the number of splits of the PSD,  $f_i$  and  $l_i$  are the frequency and the intensity of the PSD in its  
503  $i^{th}$  slot, respectively. It was calculated using Matlab 'meanfreq' function.

504

505 *Median frequency (Med Freq)*

506 Median frequency is the median normalized frequency of the power spectrum of a time-domain signal.  
507 It is calculated similarly to the signal median in the time domain, however, here the values are the  
508 power intensity in different frequency slots of the PSD. This feature was calculated using Matlab  
509 'medfreq' function.

510

511 *Power and Phase at median frequency (Pw MdFrq and Phs MdFrq)*

512 Interestingly, apart from the median frequency itself, which reflects the frequency aspect of the power  
513 spectrum, the power and phase of the signal at the median frequency have been shown to be  
514 informative about aspects of human perception (Joshi et al., 2018; Jadidi et al., 2016). Therefore, we  
515 also calculated the power and phase of the frequency-domain signals at the median frequency as  
516 features.

517

518 *Average frequency (Avg Freq)*

519 As the evoked potentials show a few number of positive and negative peaks after the stimulus onset,  
520 and the observation that they might show deviation in the positive or negative direction depending on  
521 the information content (Mazaheri and Jensen, 2008), we also evaluated the zero-crossing frequency of  
522 the ERPs. Basically, for measuring the Average Frequency, we measured the number of times the signal  
523 swapped signs during the trial. Note that each trial is baselined according to the average of the same  
524 trial in the last 200 ms immediately before the stimulus onset. We calculated the zero crossing rate on  
525 the post-stimulus time span from the time point of 0 to 1000 ms.

526

527 *Spectral edge frequency (SEF 95%)*

528 SEF is a common feature used in monitoring the depth of anesthesia and stages of sleep using EEG  
529 (Iranmanesh and Rodriguez-Villegas, 2017). It measures the frequency which covers X percent of the PSD.

530 X is usually set between 75% to 95%. Here we set X to 95%. Therefore, this reflects the maximum  
531 frequency observed in a signal which covers 95% of a signal power spectrum.

532

### 533 *Multi-valued features*

534 The main hypothesis of the present study is that, we can potentially obtain more information about  
535 object categories as well as behavior if we take into account the temporal variability of signal samples  
536 within the analysis window rather than just averaging them as in the conventional decoding studies.  
537 Therefore, we extracted other features, which provide more than one value per analysis window (i.e. 50  
538 ms for the time-resolved analysis or 1000 ms for the whole-trial analysis), so that we can select the most  
539 informative one for decoding. The reason for selecting only one feature per time window is to be able to  
540 directly compare the results with those obtained with single-valued features explained above. We also  
541 included the original signal samples as the last feature, so that we know how much (if at all) our feature  
542 extraction and selection helps.

543

### 544 *Inter-electrode correlation (Cros Cor)*

545 Following up on recent studies, which have successfully used this feature in decoding object category  
546 information from brain activations (Majima et al., 2014; Karimi-Rouzbahani et al., 2017a), we extracted  
547 inter-electrode correlation to measure the similarity between pairs of signals, here, from coming from  
548 pairs of electrodes. Through the concept of correlation, this feature can detect any subtle co-activation  
549 or co-deactivation of neural populations from distant pairs of electrodes. Although closer electrodes  
550 tend to provide more similar (and therefore correlated) activation, compared to further electrodes, the  
551 inter-electrode correlation can capture correlations which are functionally relevant and are not  
552 explained by the distance (Karimi-Rouzbahani et al., 2017a). Please note that as correlation is an  
553 amplitude-independent variable, this feature detects the similarities across pairs of signals, which  
554 cannot be determined by the mean-based features from individual signals. It is calculated as:

$$555 \quad R_{xy} = \frac{1}{N\sigma_x\sigma_y} \sum_{t=1}^N (x_t - \bar{x})(y_t - \bar{y}) \quad (19)$$

556 where  $x$  and  $y$  refer to the signals obtained from electrodes  $x$  and  $y$ , respectively. We calculated the  
557 cross-correlation between every given electrode and all the other electrodes before finally averaging  
558 them to obtain a single value per electrode. Therefore, for the datasets with 31 (i.e. Datasets 1 and 2)  
559 and 128 (i.e. Dataset 3) electrodes, we obtained 30 and 127 inter-electrode correlations per electrode.

560

### 561 *Wavelet transform (Wavelet)*

562 Recent studies have shown remarkable success in decoding of object categories using the Wavelet  
563 transformation of the EEG time series (Taghizadeh-Sarabi et al., 2015; Torabi et al., 2017). Considering the  
564 time-dependent nature of ERP signals, Wavelet transform seems to be a very reasonable choice as it  
565 provides a time-frequency representation of signal components determining the primary frequency  
566 components of a specific signal and their temporal location in the time series. To do that, the  
567 transformation passes the signal time series through digital filters (Guo et al., 2009; equation (20)), using



568 the convolution operator, each of which are adjusted to extract a specific frequency (scale) at a specific  
569 time as in (20):

$$570 \quad y_n = (x * g) = \sum_{k=-\infty}^{+\infty} x_k g_{n-k} \quad (20)$$

571

572 where  $g$  is the digital filter and  $*$  is the convolution operator. This filtering procedure is repeated for  
573 several rounds (levels) filtering low- (approximations) and high-frequency (details) components of the  
574 signal to provide more fine-grained information into the constituent components of the signal. This can  
575 lead to coefficients which can potentially discriminate signals evoked by different conditions. As in a  
576 previous study (Taghizadeh-Sarabi et al., 2015), and to make the number of Wavelet features comparable  
577 in number to the signal samples (which were 1000 after the stimulus onset), we used detail coefficients  
578 at five levels  $D1, \dots, D5$  as well as the approximate coefficients at level 5,  $A5$ . This led to 1015 features in  
579 the whole-trial and 57 in the 50 ms sliding time windows, respectively. We used the 'Symlet2' basis  
580 function for our Wavelet transformations as implemented in Matlab.

581

### 582 *Hilbert transform (Hilb Amp and Hilb Phs)*

583 There were two motivations for using Hilbert transform in the current study. First, this transformation  
584 technique, which provides amplitude and phase information of the signal upon the transformation, has  
585 recently shown success in decoding visual letter information from ERP signals (Wang et al., 2018). Second,  
586 although previous systematic comparison of Hilbert and Wavelet transforms has shown very minor  
587 differences in evaluating neuronal synchrony (Le Van Quyen et al., 2001), it is still unclear which method  
588 can detect category-relevant information from the nonstationary ERP components more effectively.  
589 Specifically, the phase component of the Hilbert transform can qualitatively provide the spatial  
590 information which you obtain from the Wavelet transformation. In signal processing, Hilbert transform is  
591 described as a mapping function that takes a function  $x(t)$  of a real variable, and using convolution with  
592 the function,  $\frac{1}{\pi t}$ , produces another function of a real variable  $H(u)(t)$  as:

$$593 \quad H(u)(t) = \frac{1}{n} \int_{-\infty}^{+\infty} \frac{u(\tau)}{t-\tau} d\tau \quad (21)$$

594

595 where  $H(u)(t)$  is a frequency-domain representation of the signal, which has simply shifted all the  
596 components of the input signal by  $\frac{\pi}{2}$ . In the current study, Hilbert transform was applied on every trial  
597 (1000 samples) or 50 ms sliding time windows, which produced one amplitude and one phase component  
598 per sample, so 1000 and 50 for the whole-trial and 50 ms sliding time windows, respectively. We used the  
599 amplitude and phase components separately to discriminate object categories in the decoding analyses.

600

### 601 *Signal samples (Samples)*

602 We also used the post-stimulus signal samples (i.e. 1000 or 50 samples for the whole-trial and sliding  
603 time windows, respectively) to decode object category information without any feature extraction. This  
604 allowed us to compare the information content of the extracted features with the original signal  
605 samples to see if the former provided any extra information.

606

## 607 **Multivariate decoding**

608 We used multivariate decoding to extract information about object categories from the EEG datasets.  
609 Basically, multivariate decoding, which has been dominating neuroimaging studies recently (Haynes et  
610 al., 2015; Grootswagers et al., 2017; Hebart and Baker, 2018), utilizes within- and cross-condition  
611 similarity/distance to determine the amount of neural information when contrasting those conditions.  
612 We used linear discriminant analysis (LDA) classifiers to measure the information content across all  
613 possible pairs of object categories in each dataset throughout our multivariate decoding. Specifically, we  
614 trained and tested the classifier on e.g. animal vs. car, animal vs. face, animal vs. plane, car vs. plane,  
615 face vs. car and plane vs. face categories, then averaged the 6 decoding results and reported them for  
616 each participant. The decoding for each of the categories, is reported in the original references of the  
617 datasets. The LDA classifier has been shown to be robust when decoding object categories from M/EEG  
618 (Grootswagers et al., 2017; Grootswagers et al., 2019), has provided higher decoding accuracies than  
619 Euclidean distance and Correlation based decoding methods (Carlson et al., 2013) and was around 30  
620 times faster to train in our initial analyses compared to the more complex classifier of support-vector  
621 machine (SVM). We ran our initial analysis and found similar results for the LDA and SVM, so used LDA  
622 to save the time. We used a 10-fold cross-validation procedure in which we trained the classifier on 90%  
623 of the data and tested it on the left-out 10% of the data, repeating the procedure 10 times until all trials  
624 from the pair of categories participate once in the training and once in the testing of the classifiers. We  
625 repeated the decoding across all possible pairs of categories within each dataset, which were 6, 6 and 15  
626 pairs for Datasets 1, 2 and 3, which consisted of 4, 4 and 6 object categories, respectively. Finally, we  
627 averaged the results across all combinations and reported them as the average decoding for each  
628 participant.

629

630 In the whole-trial analyses, we extracted the above-mentioned features from the 1000 data samples  
631 after the stimulus onset (i.e. from 1 to 1000 ms). In the time-resolved analyses, we extracted the  
632 features from 50 ms sliding time windows in steps of 5 ms across the time course of the trial (-200 to  
633 1000 ms relative to the stimulus onset time). Therefore, in time-resolved analyses, the decoding results  
634 at each time point reflect the data for the 50 ms window around the time point, from -25 to +24 ms  
635 relative to the time point. Time-resolved analyses allowed us to evaluate the evolution of object  
636 category information across time as captured by different features.

637

## 638 **Dimensionality reduction**

639 The multi-valued features explained above resulted in more than a single feature value per trial per  
640 sliding time window (e.g. inter-electrode correlation, wavelet, Hilbert amplitude and phase and signal  
641 samples), which could provide higher decoding values compared to the decoding values obtained from  
642 single-valued features merely because of including a higher number of features. Moreover, when the  
643 features outnumber the observations (i.e. trials here), the classification algorithm can over-fit to the  
644 data (Duda et al., 2012). Therefore, to obtain comparable decoding accuracies across single-valued and  
645 multi-valued features and to avoid potential over-fitting of classifier to the data we used principle  
646 component analysis (PCA) to reduce the dimension of the data for multi-valued features. Accordingly,

647 we reduced the number of the values in the multi-valued features to **one** per electrode per time window  
648 per trial, which equaled the number of values for the single-valued features. Specifically, the data matrix  
649 before dimension reduction, had a dimension of  $n$  rows by  $e \times f$  columns where  $n$ ,  $e$  and  $f$  were the  
650 number of trials (from all categories), the number of electrodes and the number of values obtained from  
651 any given feature (concatenated in columns), respectively. As  $f = 1$  for the single-valued features, for  
652 the multi-valued features, we only retained the  $e$  most informative columns that corresponded to the  
653  $e$  eigen values with highest variance and removed the other columns using PCA. Therefore, we reduced  
654 the dimension of the data matrix to  $n \times e$  which was equal between single- and multi-valued features  
655 and used the resulting data matrix for multivariate decoding. For example, before the dimension  
656 reduction, the data matrix for Dataset 3, and the inter-electrode correlation (Cros Cor) feature had a  
657 dimension of 864 rows (corresponding to all correct trials) by 16256 columns (i.e. 128 electrodes by 127  
658 inter-electrode correlation values). However, after the dimension reduction procedure, it had a  
659 dimension of 864 rows (corresponding to all correct trials) by 128 columns (i.e. a combination of  
660 electrodes and correlation values with maximum variance across the four categories). This means that,  
661 for the multi-valued features, we only retained the most informative value of the extracted values from  
662 each feature and electrode. In other words, we sub-sampled in both the space (across electrodes) and  
663 time (across time window). To avoid potential leakage of information from testing to training (Pulini et  
664 al., 2019), we applied the PCA algorithm on the training data (folds) only and used the training PCA  
665 parameters (i.e. eigen vectors and means) for both training and testing sets for dimension reduction in  
666 each cross-validation run separately. We only applied the dimension-reduction procedure on the multi-  
667 valued features. Note that, we did not reduce the dimension of the neural space (columns in the  
668 dimension-reduced data matrix) to below the number of electrodes “ $e$ ” (as was done in  
669 Hatamimajoumerd et al., 2019) as we were interested in qualitatively comparing our results with the  
670 vast literature currently using multivariate decoding with all sensors (Grootswagers et al., 2017; Karimi-  
671 Rouzbahani et al., 2017a; Hebart and Baker 2017). Also, we did not aim at finding more than one feature  
672 per trial, as we wanted to compare the results of multi-valued features with those of single-valued  
673 features, which only had a single value per trial.

674

## 675 **Statistical analyses**

### 676 **Bayes factor analysis**

677 As in our previous studies (Grootswagers et al., 2019; Robinson et al., 2019), to determine the evidence  
678 for the null and the alternative hypotheses, we used Bayes analyses as implemented by Bart Krekelberg  
679 based on Rouder et al. (2012). We used standard rules of thumb for interpreting levels of evidence (Lee  
680 and Wagenmakers, 2014; Dienes, 2014): Bayes factors of  $>10$  and  $<1/10$  were interpreted as strong  
681 evidence for the alternative and null hypotheses, respectively, and  $>3$  and  $<1/3$  were interpreted as  
682 moderate evidence for the alternative and null hypotheses, respectively. We considered the Bayes  
683 factors which fell between 3 and  $1/3$  as suggesting insufficient evidence either way.

684

685 In the whole-trial decoding analyses, we asked whether there was a difference between the decoding  
686 values obtained from all possible pairs of features and also across frequency bands within every feature.  
687 Accordingly, we performed the Bayes factor analysis and calculated the Bayes factors as the probability  
688 of the data under alternative (i.e. difference) relative to the null (i.e. no difference) hypothesis between

689 all possible pairs of features and also across frequency bands within every feature and dataset  
690 separately. The same procedure was used to evaluate evidence for difference (i.e. alternative  
691 hypothesis) or no difference (i.e. null hypothesis) in the maximum and average decoding accuracies, the  
692 time of maximum and above-chance decoding accuracies across features for each dataset separately.

693

694 We also evaluated evidence for the alternative of above-chance decoding accuracy vs. the null  
695 hypothesis of no difference from chance. For that purpose, we performed Bayes factor analysis between  
696 the distribution of actual accuracies obtained and a set of 1000 accuracies obtained from random  
697 permutation of class labels across the same pair of conditions (null distribution) on every time point (or  
698 only once for the whole-trial analysis), for each feature and dataset separately. No correction for  
699 multiple comparisons have been performed when using Bayes factors as they are much more  
700 conservative than frequentist analysis in providing false claims with confidence (Gelman and Tuerlinckx,  
701 2000; Gelman et al., 2012).

702

703 The priors for all Bayes factor analyses were determined based on Jeffrey-Zellner-Siow priors (Jeffreys,  
704 1961; Zellner and Siow, 1980) which are from the Cauchy distribution based on the effect size that is  
705 initially calculated in the algorithm (Rouder et al., 2012). The priors are data-driven and have been  
706 shown to be invariant with respect to linear transformations of measurement units (Rouder et al., 2012),  
707 which reduces the chance of being biased towards the null or alternative hypotheses.

### 708 **Random permutation testing**

709 To evaluate the significance of correlations between decoding accuracies and behavioral reaction times,  
710 we calculated the percentage of the actual correlations that were higher (if positive) or lower (if  
711 negative) than a set of 1000 randomly generated correlations. These random correlations were obtained  
712 by randomizing the order of participants' data in the behavioral reaction time vector (null distribution)  
713 on every time point, for each feature separately. The correlation was considered significant if surpassed  
714 95% of the randomly generated correlations in the null distribution in either positive or negative  
715 directions ( $p < 0.05$ ) and the p-values were corrected for multiple comparisons across time using Matlab  
716 `mafdr` function which works based on fix rejection region (Storey, 2002).

717

## 718 **Results**

### 719 **Which features of the recorded signals are most informative about object categories?**

720 To answer the first question of this study, we compared decoding accuracies in the whole-trial time span  
721 across all features and for each dataset separately (Figure 2, black bars). This is a more conventional  
722 pass on the data, which incorporates the whole trial time span, and gives insight about the information  
723 content of the recorded signals for decoding object category information (Kaneshiro et al., 2015). For  
724 direct comparison of the decoding accuracies across features and frequency bands, see the bar plots in  
725 Figure 2 and check their corresponding evidence for difference (the alternative hypothesis) and/or no  
726 difference (the null hypothesis) in Supplementary Figure 1A and Supplementary Figure 1B.

727 Not all features could provide strong ( $BF > 10$ ) evidence for above-chance decoding (Figure 2). There was  
728 strong evidence ( $BF > 10$ ) that the four ERP components (i.e. P1, N1, P2a and P2b), and a few multi-  
729 valued features consisting of Wavelet, Hilb Phs and Samples provided above-chance decoding. In  
730 addition, consistently across the three datasets, there was moderate or strong evidence ( $BF > 3$ ;  
731 Supplementary Figure 1A; black boxes) that most of the ERP components (i.e. N1, P2a and P2b) and  
732 multi-valued features (i.e. Wavelet, Hilb Phs and Samples) provided higher decoding accuracies  
733 compared to the rest of the features. This result is consistent with our prediction that features which are  
734 spatially and/or temporally specific (and targeted) can potentially detect more information about object  
735 categories as category processing is a spatially and temporally specific neural process generally observed  
736 in the window from 50 to 300 ms post-stimulus onset (Karimi-Rouzbahani et al., 2017b; which overlap  
737 with the ERP features) and mainly in around the occipito-temporal, occipito-parietal and frontal areas  
738 (Vaziri-Pashkam and Xu, 2017; Karimi-Rouzbahani 2018; these electrodes were probably selected  
739 through the PCA procedure for the multi-valued features). As explained in the methods, for keeping the  
740 dimension of the data identical to the single-valued features, the multi-valued features underwent a  
741 PCA-based sample selection process, which selected the most informative samples/features from across  
742 electrodes (space) and samples (time) in the analysis window. Accordingly, the reason for comparable  
743 decoding accuracies obtained for the Samples feature and the ERP components across the three  
744 datasets, might be that, the signal samples used in the Samples may have come roughly from nearby  
745 time windows of the trial as the ERP components, through the PCA procedure. The higher decoding  
746 values for Dataset 2 compared to the other datasets can be potentially explained by the active object  
747 detection task and longer image presentation time. In summary, the spatial and/or temporally specific  
748 ERP components (i.e. N1, P2a and P2b) and the multi-valued features (i.e. Wavelet, Hilb Phs and  
749 Samples) were most informative about object categories as predicted.

750

751 Following evidence from previous studies reporting pronounced information in specific frequency sub-  
752 bands such as Theta (Behroozi et al., 2016; Bastos et al., 2015), we also compared the decoding  
753 accuracies across different frequency sub-bands to see what frequency band(s) provided the most  
754 information. Specifically, we evaluated the information contents of features in the well-known EEG  
755 frequency bands of Delta (0.5-4 Hz), Theta (4-8 Hz), Alpha (8-12 Hz), Beta (12-16 Hz) and Gamma (>25  
756 Hz) against the broad-band signals, which covered the whole available spectrum after pre-processing  
757 (>0.03Hz, Figure 2). We did not perform the decoding for the frequency-domain features (except Signal  
758 pw), as they would be meaningless in limited frequency bands by definition. For Signal Pw, however, as  
759 in previous studies (Rupp et al., 2017; Miyakawa et al., 2018; Behroozi et al., 2016) we calculated it in  
760 the time domain and performed the decoding. Showing comparable patterns of decoding to the broad-  
761 band results, the decoding across features especially in the mid-frequency bands of Theta, Alpha and  
762 Beta (Figure 2) showed moderate to strong evidence ( $BF > 3$ ; Supplementary Figure 1B; red boxes) that  
763 ERP components and multi-valued features were the most informative about object categories.

764

765

766

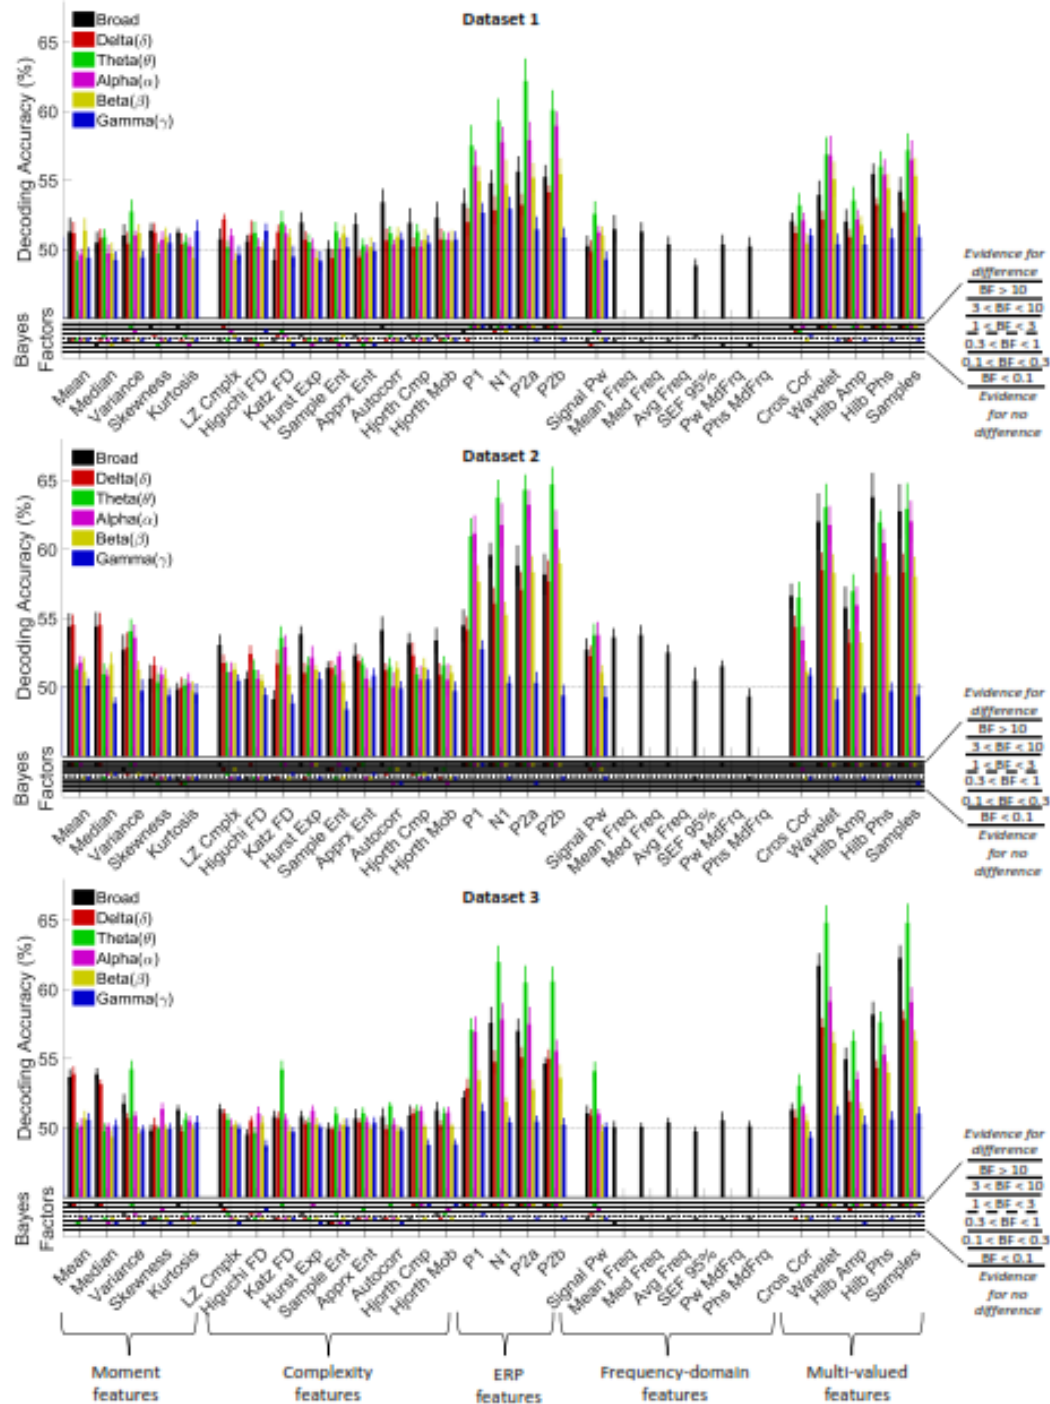

**Figure 2.** Whole-trial decoding of object categories from the three datasets using 30 features on different frequency bands (for Bayesian evidence analyses see Supplementary Figure 1). Decoding of category information using the 30 features in the 6 frequency bands. The black horizontal dashed lines on the top panel refer to chance-level decoding. Thick bars show the average decoding across participants (error bars Standard Error across participants). Bayes Factors are shown in the bottom panel of each graph: Filled circles show moderate/strong evidence for either hypothesis and empty circles indicate insufficient evidence. They show the results of Bayes factor analysis when evaluating the difference from chance-level decoding.

767 In Datasets 1 and 2, where the upper cut-off frequency of filtering was 200 Hz rather than 50 Hz as in  
768 Dataset 3, the broad-band decoding accuracies were on average higher for many of complexity features  
769 (consisting of Hurst Exp, Apprx Ent, Autocorr, Hjorth Cmp and Mob). The reason is likely that the  
770 inclusion of more frequency components (i.e. higher frequency fluctuations) leads to the survival of  
771 meaningful repetitive (e.g. higher frequency harmonics) and complex patterns in the time series, which  
772 are detected by the features which are sensitive to repetitive sinusoidal (i.e. Hurst Exp, Autocorr, Hjorth  
773 Cmp and Mob) and complex (i.e. Apprx Ent) patterns.

774

775 Interestingly, however, the most informative features in the datasets (i.e. ERP and multi-valued  
776 features) showed pronounced information in the Theta band over other sub-bands, with strong  
777 evidence  $BF > 10$  for the advantage of Theta over broad-band decoding for P1 and P2b in both datasets.  
778 There was also moderate ( $3 < BF < 10$ ) or strong ( $BF > 10$ ) evidence that the Gamma band accuracies were  
779 lowest among other frequency bands for many features including ERP components and multi-valued  
780 features (Supplementary Figure 1B; red boxes).

781 Together, frequency-resolved results showed that broad-band signals can provide more information  
782 than its sub-bands when using features sensitive to repetitive and complex patterns. Importantly,  
783 however, ERP components and multi-valued features, which showed the highest information about  
784 object categories in the feature set, showed the greatest information in the Theta band, even more than  
785 which could be achieved using broad-band signals. The coding of category information in the Theta band  
786 for the informative features suggests that this information is dominantly processed by the feed-forward  
787 visual mechanisms of the brain as suggested previously to reflect in the Theta band (Bastos et al., 2015).

788

### 789 [What is the temporal dynamics of object category decoding when using distinct features](#) 790 [of brain activations?](#)

791 To answer the second question, we adopted a time-resolved decoding procedure for each feature and  
792 dataset separately (Grootswagers et al., 2017; see *Methods*). In this method, we repeated the decoding  
793 of category information in 50 ms sliding time windows, using a 5 ms step size (45 ms overlap between  
794 consecutive time windows) across the time course of the trials (Figure 3). For a justification of choosing  
795 the 50ms time window see Supplementary Text 2 and Supplementary Figure 2A. This analysis provided  
796 the temporal profile of information encoding as revealed by different features. Note that, by definition,  
797 we do not have the time-resolved decoding results of the time-specific features of ERP components (i.e.  
798 P1, N2, P2a and P2b).

799

800 The advantage of the Theta-band to broad-band frequency range, observed for the whole-trial time  
801 window (Figure 2), was also observed for the time-resolved decoding when using the Wavelet feature  
802 (especially for Dataset 2 which showed the effect across many time points; moderate to strong ( $BF > 3$ )  
803 evidence starting to appear after 50 ms post-stimulus onset), but not the Mean feature (Supplementary  
804 Figure 1A). However, we used broad-band signals for the time-resolved decoding analyses, because we  
805 not only aimed at comparing the information content of the features, but we were also interested in  
806 comparing our results with the previous category decoding studies which used the broad-band

807 frequency range. Note that we do not aim to maximize the decoding values in this study, but rather aim  
808 to compare the decoding dynamics and their correlations to behavior across a wide range of relevant  
809 features.

810

811 While no pairs of features provided identical patterns of decoding in any of the three datasets, for all  
812 features there was moderate ( $3 < BF < 10$ ) or strong ( $BF > 10$ ) evidence for difference from chance-level  
813 decoding at some time points/windows in the three datasets (Figure 3). This means that, all features,  
814 including the complexity and frequency-domain features, which have been respectively suggested to  
815 need longer time windows (Procaccia, 2000) and stationary signals, could be successfully used to decode  
816 object category information from evoked ERP signals. We did not plot the variance of decoding  
817 accuracies across participants, as it would make the figures cluttered (see Supplementary Figure 2 for  
818 decoding results using Mean and Wavelet features along with their variance across participants to get a  
819 feeling of the variance for other features). Interestingly, while the Mean and Median features generally  
820 showed lower decoding accuracies in the whole-trial analyses (Figure 2), they provided comparable or  
821 even higher decoding accuracies than several of the multi-valued features in the time-resolved analysis  
822 (Figure 3). This is because Mean and Median of the signals lost most of their information (as a result of  
823 baseline removal in preprocessing) when averaged across a whole-trial time span (i.e. 1000 samples;  
824 Figure 2). While the decoding curves in Dataset 1 showed two comparable early peaks at around 180  
825 and 300 ms for several features such as Mean and Median, most other highly informative features (e.g.  
826 Variance, Wavelet and Samples) showed only one peak at around 180 ms. There was only one peak for  
827 Mean, Median and frequency-domain and multi-valued features in Datasets 2 and 3 and two dominant  
828 peaks for the other features including the complexity and moment features. This discrepancy across  
829 datasets can be explained by many parameters which differ across them. For example, image  
830 presentation onset and offset can lead to bumps in decoding patterns (Carlson et al., 2013) which was  
831 the case for Dataset 1 (50 ms) happening in close temporal succession, but further apart for the other  
832 datasets. Consistently across the three datasets, for all features, there was moderate ( $3 < BF < 10$ ) or  
833 strong ( $BF > 10$ ) evidence for above-chance decoding starting to appear from around 80 ms. The decoding  
834 curves returned back to the chance-level around than 500 ms, particularly for the most informative  
835 features such as Mean, Median and multi-valued features in Dataset 1. The same features remained  
836 above chance ( $BF > 3$ ) up until 550 ms (Dataset 2) or even later than 800 ms (Dataset 3). This difference  
837 can be potentially because of the longer stimulus presentation time in Datasets 2 and 3, which provided  
838 stronger sensory input for processing of category information (Grootswagers et al., 2019).

839

840 To quantitatively compare the decoding patterns across features, we calculated several time and  
841 amplitude-related parameters from the decoding curves (Figure 4). These parameters consist of  
842 maximum and average decoding accuracies, the time to the first above-chance ( $BF > 3$ ) and maximum  
843 decoding. All parameters were calculated in the post-stimulus window (0 to 1000 ms), and have  
844 previously provided important implications for studying the dynamics of object recognition in the  
845 human brain (Isik et al., 2014). There was strong evidence that all features from all three datasets had  
846 above-chance maximum decoding accuracy (Figure 4A; colored dots in the bottom Bayes Factors'  
847 panels). The features of Mean, Median, Wavelet and Samples obtained the highest maximum and  
848 average decoding accuracies among other features (Figure 4A; black boxes).



84

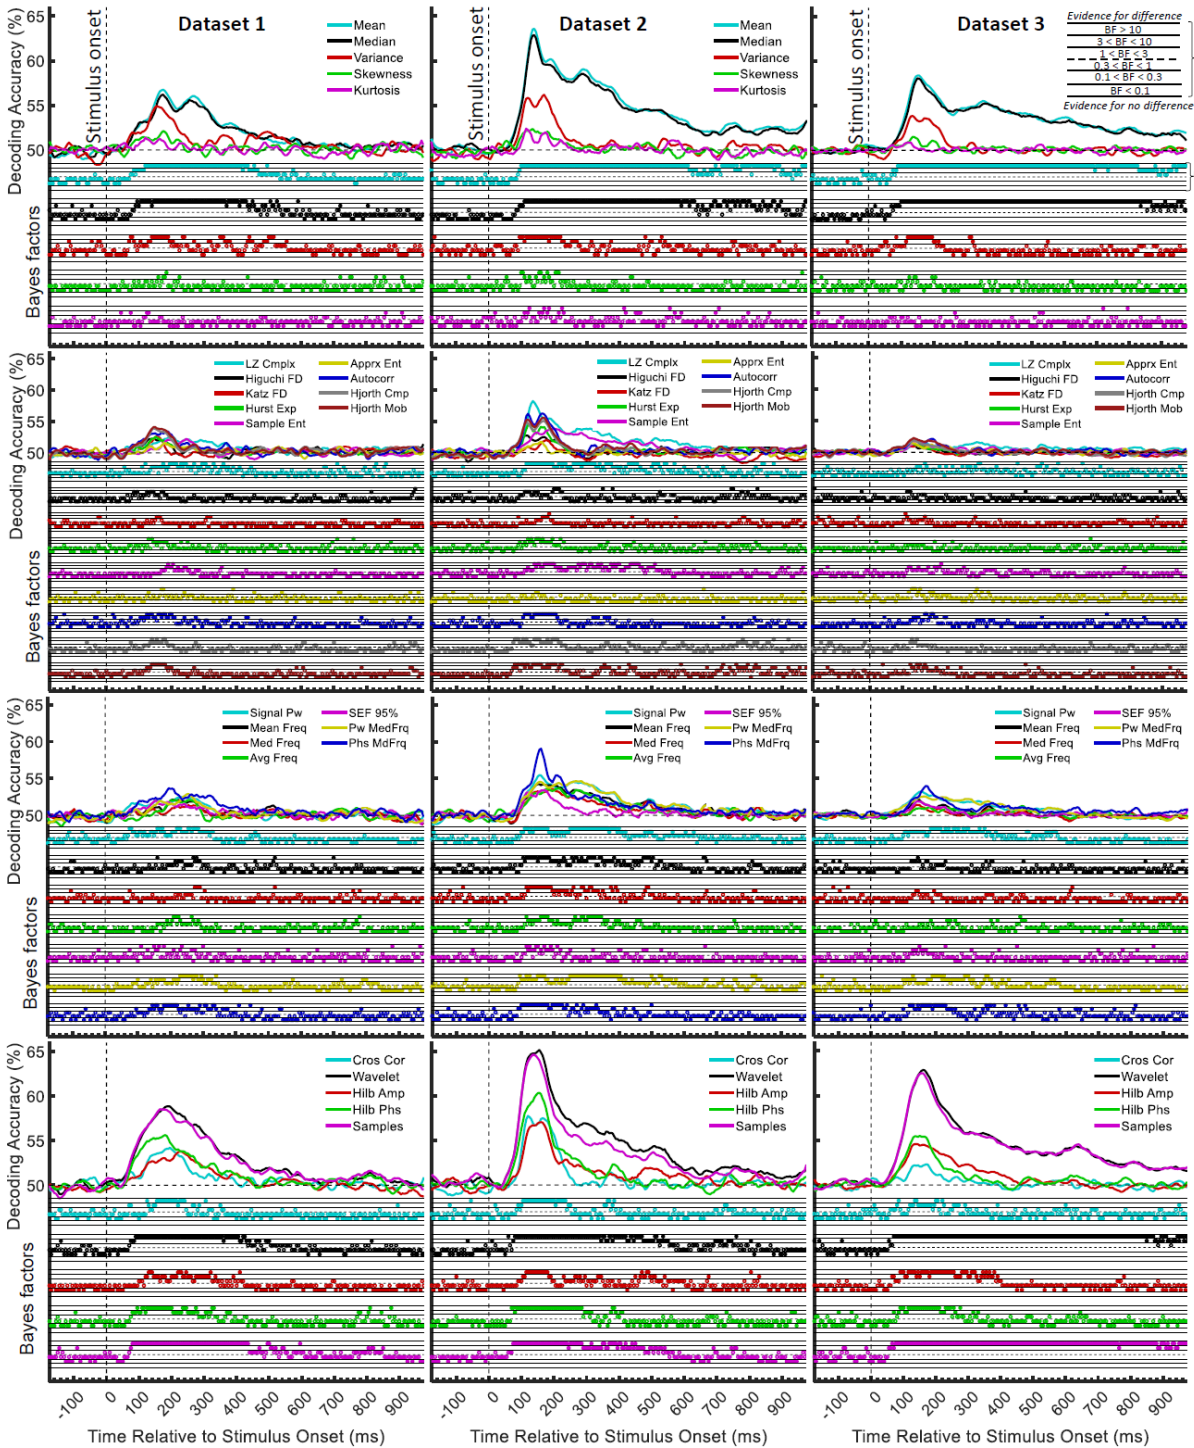

**Figure 3.** Time-resolved decoding of object categories from the three datasets using 26 features and Bayesian evidence analyses. Each row shows the results of one type of feature (i.e. moment, complexity, frequency-domain and multi-valued features from top to bottom, respectively). Curves show the average decoding across participants. Each column shows the results for one dataset. Top section in each panel shows the decoding accuracies across time and the bottom section shows the Bayes factor evidence for the difference of the decoding accuracy compared to chance-level decoding. The horizontal dashed lines on the top panel refer to chance-level decoding. Filled circles in the Bayes Factors show moderate/strong evidence for either difference or no difference from chance-level decoding and empty circles indicate insufficient evidence for either hypotheses.

850 There was strong ( $BF > 10$ ) evidence that Wavelet had the highest maximum decoding accuracy  
851 compared to all other features (except Samples in all three datasets and Mean and Median in Dataset  
852 2). Although there was strong ( $BF > 10$ ) evidence that Mean, Median, Wavelet and Samples provided  
853 above-chance average accuracy across the three datasets, there was insufficient ( $0.3 < BF < 1$ ) evidence for  
854 above-chance average accuracy for several other features (e.g. Katz FD).

855

856 The temporal dynamics of different features seem to reflect a similar decoding pattern in the sense that  
857 the most informative features can lead to both a higher maximum decoding and a more sustained  
858 decoding pattern along the trial and vice versa. This can suggest a general advantage for the more vs.  
859 less informative features which is reflected both in their maxima as well as their sustained decoding  
860 patterns. Alternatively, it can be the case that features with higher maxima have lower average  
861 decoding across the trial or vice versa. This, on the other hand, suggests that different features detect  
862 an equal amount of information but represent it either in their maximum or average decoding accuracy.  
863 A second alternative can be that there is no relationship between the peaks and the average decoding  
864 across features, reflecting potentially different pieces of neural code that each feature is sensitive to. To  
865 test this question, we calculated the correlation between the average and maximum decoding values for  
866 all features, which showed highly correlated results ( $r > 0.9$ ;  $p < 0.01$ ; Supplementary Text 3 and  
867 Supplementary Figure 3A). This suggests that, all features followed a generally similar pattern of  
868 decoding with more informative features providing higher decoding maxima and a more sustained level  
869 of information decoding.

870

871 In terms of the temporal pattern, the time to the maximum decoding was quite constrained as many of  
872 the features showed a maximum decoding between 150 to 220 ms post-stimulus onset, and there was  
873 no clear trend towards any classes of features (Figure 4C). This is consistent with many decoding studies  
874 showing the temporal dynamics of category processing in the brain (Isik et al., 2013; Cichy et al., 2014).  
875 There was moderate ( $3 < BF < 10$ ) or strong ( $BF > 10$ ) evidence that Wavelet, Hilb Phs and Samples were  
876 among the earliest features to reach their peaks in Datasets 2 and 3. The time of first above-chance  
877 ( $BF > 3$ ) decoding did not show the priority of any specific class of features relative to others (Figure 4D).  
878 There was moderate ( $3 < BF < 10$ ) or strong ( $BF > 10$ ) evidence that Mean, Median, Wavelet and Samples  
879 showed an earlier appearance of above-chance decoding compared to Sample Ent, Avg Freq, Med Freq,  
880 SEF 95%, Cros Cor and Katz FD in Dataset 1. There was moderate ( $3 < BF < 10$ ) evidence that Hjorth Cmp  
881 and Mob, were among the earliest features to show decoding in Dataset 2.

882

883 There has been no consensus yet about whether the time of the maximum or the first above-chance  
884 decoding reflects the speed of category processing in the brain (Grootswagers et al., 2017; Ritchie et al.,  
885 2015). Hence, we calculated the correlation of these temporal parameters across features to see if they  
886 both possibly reflect the dynamics of the same processing mechanism in the brain. The time of first  
887 above-chance and maximum decoding correlated in Datasets 2 and 3 but not Dataset 1 ( $r = 0.67$ ,  $r = 0.51$   
888 and  $r = 0.02$  respectively for Datasets 1, 2 and 3; Supplementary Text 3 and Supplementary Figure 3A).  
889 Lack of significant correlation for Dataset 1 can be explained by the lower decoding values in Dataset 1  
890 compared to the other datasets making the correlations noisier.

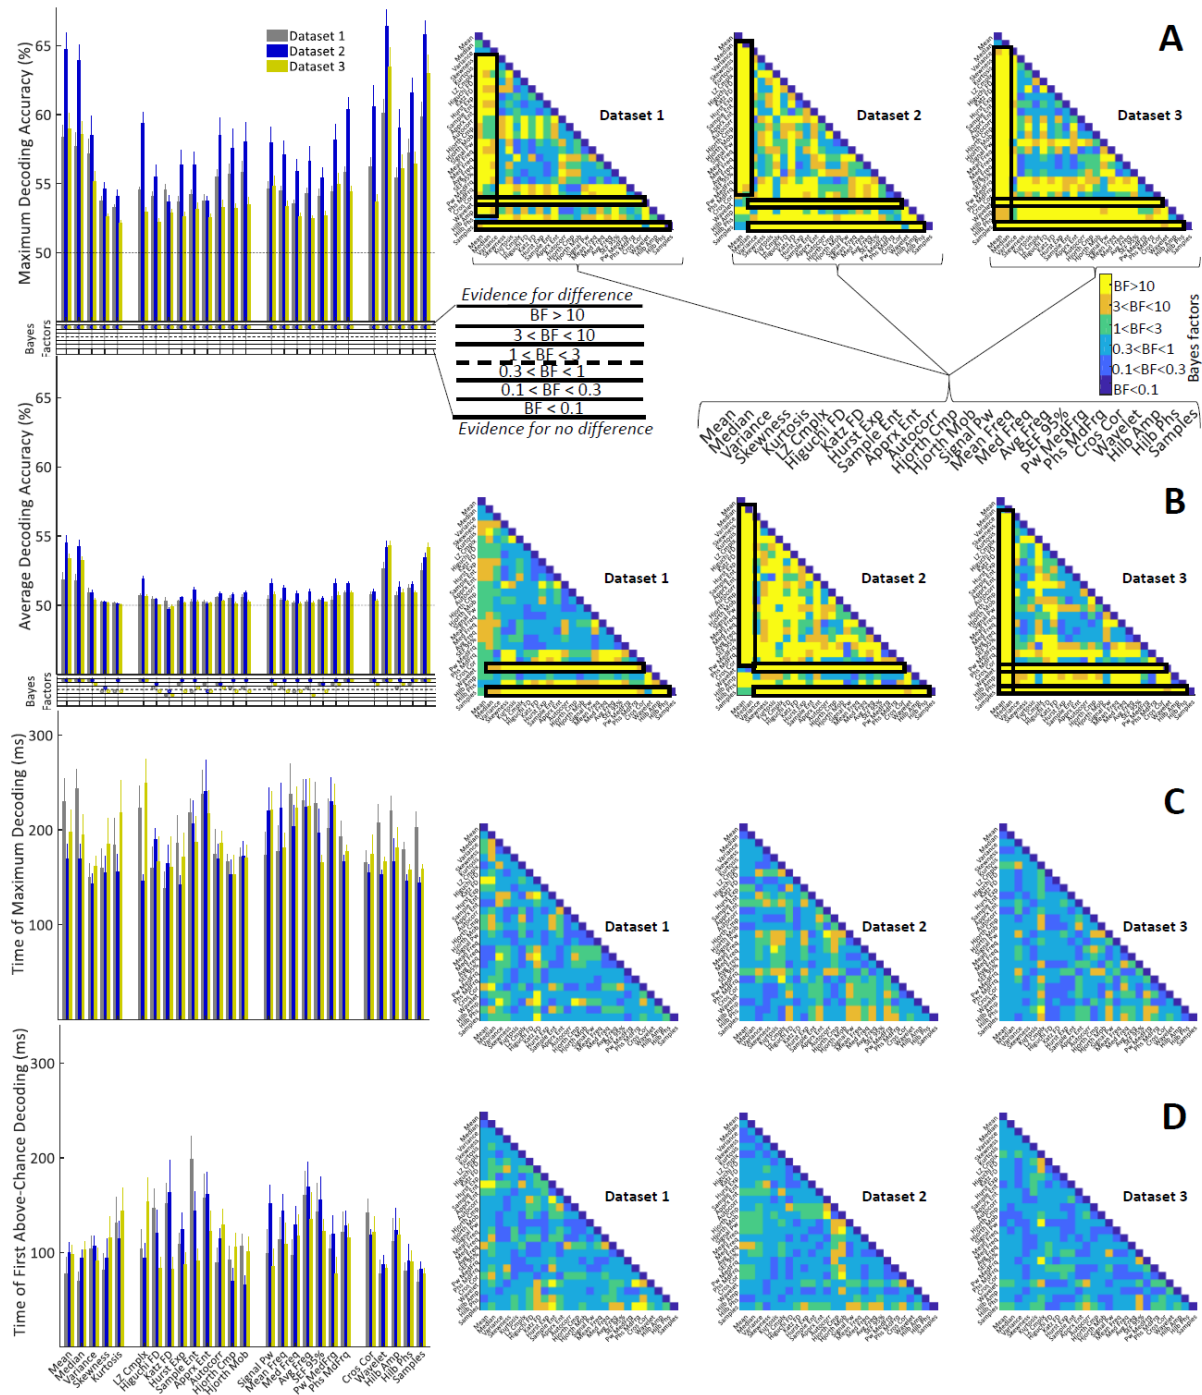

**Figure 4.** Timing and amplitude parameters extracted from the time-resolved accuracies of each feature and each dataset and their Bayesian evidence analyses. (A-D) Left: the maximum and average decoding accuracies, the time of maximum and the first above-chance decoding. Thick bars show the average across participants (error bars Standard Error across participants). Bottom section on A and B show the Bayes factor evidence for the difference of the decoding accuracy compared to chance-level decoding; Right: matrices compare the right parameters obtained from different features. Different levels of evidence for existing difference (moderate  $3 < BF < 10$ , Orange; strong  $BF > 10$ , Yellow), no difference (moderate  $0.1 < BF < 0.3$ , light blue; strong  $BF < 0.1$ , dark blue) or insufficient evidence ( $1 < BF < 3$  green;  $0.3 < BF < 1$  Cyan) for either hypotheses. Black and red boxes show moderate or strong evidence for higher decoding values for specific features compared other sets of features as explained in the text. The horizontal dashed lines on the left panels of (A) and (B) refer to chance-level decoding. Filled circles in the Bayes Factors show moderate/strong evidence for either hypothesis and empty circles indicate insufficient evidence.

892 Therefore, features that reached their above-chance decoding earlier also reached their maximum  
893 decoding earlier leading to the suggestion that they both reflect the temporal dynamics of the same  
894 cognitive processes with some delay.

895

896 In conclusion, the features of Mean, Wavelet and Samples, not only provided the maximum and average  
897 amount of category-related information in the brain, but they also were among the earliest features  
898 that provided signatures of object category information in the brain at around 100 ms post stimulus  
899 onset. Results suggest that our prediction that reliance on temporally and spatially specific features  
900 improves the accuracy in reading out the dynamics of object category processing in the brain. Moreover,  
901 it shows that object category information peaked at around 180 ms after the stimulus onset,  
902 irrespective of the feature used for decoding of information, which further constrains the temporal  
903 window of category processing in the object processing literature to the span of 100 to 200 ms.

904

### 905 [Which features of brain activations explain behavioral recognition performance?](#)

906 Although the results above showed the advantage of specific features to others in providing the highest  
907 and the earliest signatures of object category processing, this can all be a by-product of the actual neural  
908 processing that underlies human object recognition behavior (Vidaurre et al., 2019). Therefore, to see if  
909 the decoding patterns provided by these features can explain behavioral performance, we calculated  
910 the *correlation* between the decoding accuracies obtained from each feature and the reaction times of  
911 participants at every time point around the stimulus onset (Ritchie et al., 2015; Karimi-Rouzbahani et al.,  
912 2020a). Participants' reaction time in object recognition has been previously shown to be predictable  
913 from decoding accuracy (Ritchie et al., 2015). We expected to observe negative correlation values  
914 between decoding accuracies and participants' reaction time in the post-stimulus span, meaning that  
915 greater separability across neural representations of object categories would lead to/correlate with  
916 faster recognition of the corresponding categories. For this analysis, we only used Dataset 2 as it was the  
917 only dataset with an active object detection task; therefore relevant reaction times were available. To  
918 calculate the correlations, we generated a 10-dimensional vector of neural decoding accuracies at every  
919 time point and a 10-dimensional vector for behavioral reaction times obtained from the group of 10  
920 participants and correlated the two vectors across the time course of trials using Spearman's rank-order  
921 correlation (Cichy et al., 2014). This resulted in a single correlation value for each time point for the  
922 group of 10 participants.

923

924 All features, except Katz FD, showed negative trends after the stimulus onset (Figure 5A). The negative  
925 correlations did not remain significant for long windows of the time, except for multi-valued features,  
926 which showed more pronounced negative correlations that remained significant for larger spans of time.  
927 Correlations also showed larger negative peaks (generally  $< -0.5$ ) for multi-valued features especially  
928 Wavelet, compared to other features (generally  $> -0.5$ ). Specifically, while higher-order moment features  
929 (i.e. Variance, Skewness and Kurtosis) as well as many complexity features showed earlier peaks of  
930 negative correlations at around 150 ms, Mean, Median, frequency-domain features and multi-valued  
931 features showed later negative peaks after 300 ms.

932

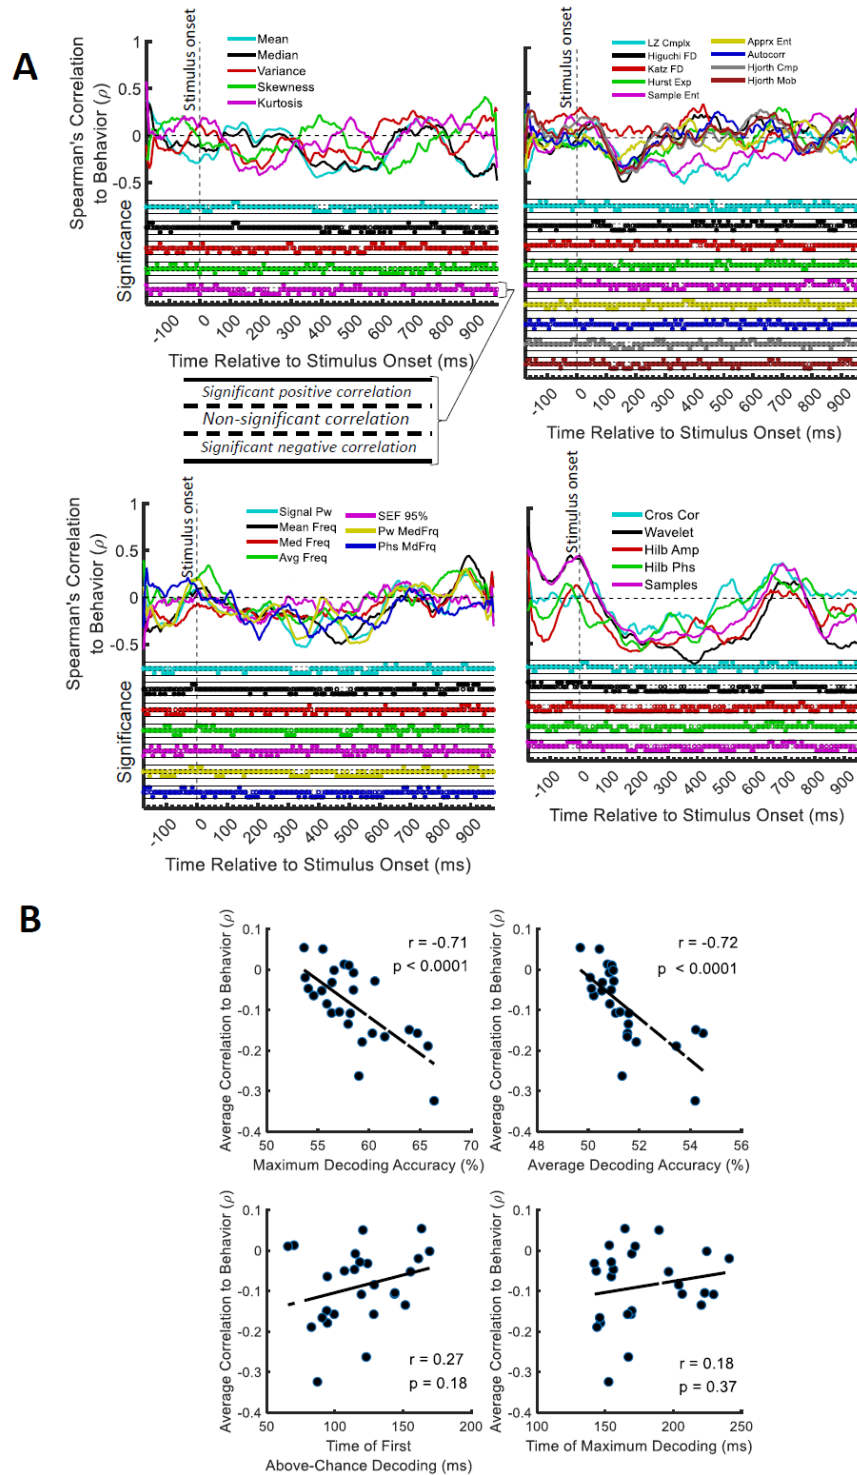

**Figure 5.** Correlation between the decoding accuracies and behavioral reaction time for Dataset 2 (other datasets did not have an object recognition/detection task). (A) Top section in each panel shows the (Spearman's) correlation coefficient obtained from correlating the decoding values and the reaction times for each feature separately. Correlation curves were obtained from the data of all participants. Bottom section shows positively or negatively significant ( $P < 0.05$ ; filled circles) or non-significant ( $p > 0.05$ ; empty circles) correlations as evaluated by random permutation of the variables in correlation. (B) Correlation between each of the amplitude and timing parameters of time-resolved decoding (i.e. maximum and average decoding accuracy and time of first and maximum decoding) with the average time-resolved correlations calculated from (A) for the set of  $N = 26$  features. The slant line shows the best linear fit to the distribution of the data.

933 The multi-valued features (especially Wavelet), Mean, Median, which dominated other features in terms  
934 of decoding accuracy (Figures 2-4), showed also the largest window of negative correlations to behavior.

935

936 Together, it seems that features with the highest decoding accuracy were also better at explaining  
937 behavioral performance. This was reflected in their longer time windows and larger negative peaks of  
938 correlations. To quantitatively assess this hypothesis, we calculated the correlation between different  
939 parameters of the decoding accuracy curves (Figure 4) and the average correlation-to-behavior obtained  
940 from the same features (Figure 5A). For the decoding accuracy parameters, we used the average and  
941 maximum decoding accuracies which are relevant for our hypothesis; and the time to the first above-  
942 chance and maximum decoding accuracies which were irrelevant to our hypothesis, and were used as  
943 control for comparison. To obtain the average correlation-to-behavior, we simply averaged the  
944 'correlation to behavior' in the post-stimulus time span (from Figure 5A). Results showed that (Figure  
945 5B), while the temporal parameters of 'time of first above-chance' and 'maximum' decoding (which  
946 were our control irrelevant parameters) failed to predict the level of correlation to behavior ( $r=0.27$ ,  
947  $p=0.27$ , and  $r=0.18$ ,  $p=0.37$ , respectively), the amplitude parameters of 'maximum' and 'average'  
948 decoding accuracies of features significantly ( $r=-0.71$  and  $r=-0.72$  respectively, with  $p<0.0001$ ; Pearson's  
949 correlation) predicted the average correlation between the features' decoding accuracies and the  
950 behavioral performance.

951

952 This result showed that features which provided more information about object categories (i.e. provided  
953 higher decoding accuracy), also predicted behavioral performance better. Therefore, the extraction of  
954 temporally and spatially specific information from brain activations, which has been achieved through  
955 features such as PCA-based Wavelet transform, can lead to more accurate prediction of behavioral  
956 performance in object recognition. This suggests that, finding the category-related informative samples  
957 and features can not only provide us with a more accurate view of the dynamics of neural processing in  
958 the brain, but it will also improve our ability in predicting the object recognition performance. This is not  
959 a trivial result, which might incorrectly be expected to be obtained by a higher decoding value for the  
960 more informative features leading to a higher correlation to behavior. This is because, the mathematical  
961 calculation of the 'correlation coefficient' standardizes the variables, so that the changes in  
962 scale/amplitude will not affect its value.

963

## 964 Discussion

965 None of the methods or algorithms discussed in this paper are new; the novel contribution of this work  
966 is an empirical and quantitative comparison of a large set of statistical and mathematical EEG features  
967 which have been suggested to provide object category information in multivariate decoding. In the  
968 whole-trial analyses, we showed that the features, which were temporally and spatially specific (ERP  
969 components and multi-valued features), could provide more information about object categories than  
970 non-specific features. Results also showed that, the Theta frequency band provided more information  
971 about object categories than the conventionally used broad-band activity, whether decoding the whole  
972 trial or the time-resolved data. We showed that multi-valued features such as Samples and Wavelet

973 coefficients can provided information up and above the generally-used feature of Mean brain activity,  
974 which overlooks the temporal codes within the sliding time windows across the signal time series. We  
975 also showed that the Wavelet feature, not only provided the highest decoding accuracy, but it also  
976 explained the behavioral object recognition performance better than all the other features. As the  
977 mentioned results were generally consistent across three datasets, which had been collected across a  
978 wide range of variations, the generalizability of the results are far more than previous studies. Our  
979 results suggest that improving the performance in decoding could be a path for improving the  
980 behavioral explanatory power in multivariate decoding, which can help filling the gap between  
981 neuroimaging and behavior.

982

983 This study provides new insights for the fields of cognitive neuroscience and BCI at the same time. In the  
984 past two decades, many neuroimaging studies in cognitive neuroscience have tried to provide insights  
985 into the spatiotemporal dynamics of object category processing in the human brain (Haxby et al., 2001;  
986 Contini et al., 2017; Carlson et al., 2013). This study does not provide any information about the spatial  
987 location of object category information processing in the brain. From the temporal viewpoint, however,  
988 it suggests that to access more variance in the neural code, we need to take the temporal and spatial  
989 information of the neural activations into account when running multivariate decoding. This aligns with  
990 the recent shift towards taking into account the temporal variability of trials when decoding visual  
991 information from high-temporal resolution methods such as MEG (Vidaurre et al., 2019). Importantly,  
992 our results showed that, multi-valued features such as original signal Samples and Wavelet coefficients,  
993 could provide information up and above which could be achieved using the conventional Mean-based  
994 decoding analyses (Grootswagers et al., 2017). This is because, with (i.e. Wavelet) or without any  
995 transformation (i.e. Samples), these features extracted the most informative samples across electrodes  
996 within each sliding time window. Therefore, through the use of PCA, the selection of samples from  
997 different electrodes were directed towards the most informative samples/features (i.e. wavelet  
998 coefficients which even provided more information). This supports previous studies which show that the  
999 temporal patterns of activity could provide information regarding the co-occurrences of visual edges  
1000 (Eckhorn et al., 1988) and orientation in primary visual cortex (Celebrini et al., 1993) as well as light  
1001 intensity in the retina (Gollisch and Meister, 2008). This is also consistent with more recent findings in  
1002 object recognition suggesting a role for the temporal phase (Behroozi et al., 2016) or within-trial  
1003 correlation in the temporal cortex (Majima et al., 2014). However, none of the mentioned studies have  
1004 validated their results across multiple datasets to provide a more generalizable view on object category  
1005 encoding in the human brain. Moreover, the advantage of the Theta band, to all the other frequency  
1006 bands evaluated in this study, is consistent with the observation of Theta band being involved in the  
1007 processing of feed-forward visual information (Bastos et al., 2015), which is dominant in the evaluated  
1008 object recognition datasets used here.

1009

1010 Importantly, even the complexity features which have been suggested to suffer when analyzing short  
1011 sequences of the data (50 samples here; Procaccia, 1988) provided information about object categories  
1012 showing above-chance decoding in the 100 ms to 300 ms time window at some point, with more  
1013 pronounced results for Dataset 2. This supports previous suggestions (Preißl et al., 1997; Ahmadi-Pajouh  
1014 et al., 2018; Torabi et al., 2017; Namazi et al., 2018) that even short EEG time series can show highly

1015 complex and nonlinear but meaningful structures, which if read appropriately (e.g. through LZ  
1016 complexity) can provide significant amounts of information about sensory processes. Another  
1017 interesting observation was the information content provided by the frequency-domain features (e.g.  
1018 phase at median frequency). These features have been suggested to be more suitable for the extraction  
1019 of information from stationary time series and not EEG evoked potentials. Comparing the whole-trial  
1020 and time-resolved results suggest that splitting the signal into its sub-sequences can lead to a more  
1021 stationary time series allowing frequency features to become more informative.

1022

1023 Another important question in cognitive neuroscience has been whether (if at all) neuroimaging data  
1024 can explain behavior (Williams et al., 2007; Ritchie et al., 2015; Woolgar et al., 2019). Although many  
1025 recent studies have found correlations between the neural decoding and behavioral performance in  
1026 object and face recognition (Karimi-Rouzbahani et al., 2019; Karimi-Rouzbahani et al., 2020a; Dobs et al.,  
1027 2019), as we also did in the current study, one question that had remained unanswered was whether a  
1028 more optimal decoding of object category processing, which is searched for here using feature  
1029 extraction, could explain the behavioral performance more accurately. Here, we showed that, this can  
1030 be the case. The reason for this observation seems to be that, if there is any explanatory power in the  
1031 conventional Mean-based decoding analyses, it should improve if we can detect and utilize the  
1032 additional neural codes which have been ignored as a result of down-sampling/temporal averaging.  
1033 Interestingly, here we observed that there seems to be a linear relationship between the decoding  
1034 accuracy that we can obtain and the explanatory power of the features suggesting that in order to bring  
1035 the neuroimaging closer to behavior, we might need to work on how we can read out the neural code  
1036 more optimally.

1037

1038 As for the field of visual-representation-based BCI, in which the aim is to improve the decoding  
1039 performance for improved brain-computer interaction (Wang et al., 2012; Van Gerven et al., 2009), this  
1040 study provides new suggestions. Specifically, we showed that, when considering the whole-trial data,  
1041 which is often the case in BCI, the ERP components and the multi-valued features provided the highest  
1042 amount of information about object categories, and it is most pronounced in the Theta band. None of  
1043 the previous studies, which used the ERP components (Wang et al., 2012; Qin et al., 2016; Jadidi et al.,  
1044 2016) or the Wavelet transformation (Taghizadeh-Sarabi et al., 2015; Torabi et al., 2017), limited their  
1045 frequency band to the Theta band, which here showed higher decoding accuracy in both the whole-trial  
1046 ERP components (Figure 2) as well as sliding-window Wavelet component (Supplementary  
1047 Supplementary Figure 1A). Therefore, the suggestion that this work can have for BCI might be to  
1048 concentrate at specific frequency sub-bands relevant to the cognitive or sensory processing undergoing  
1049 in the brain; i.e. looking at the Theta band which has been suggested to reflect feed-forward visual  
1050 information processing in the brain (Bastos et al., 2015) when doing visual-representation-based BCI.

1051

1052 While many studies have used supervised computational algorithms such as Common Spatial Patterns  
1053 (Murphy et al., 2011), Voltage Topographies (Tzovara et al., 2011), Independent Component Analysis  
1054 (Stewart et al., 2014) and Convolutional Neural Networks (Seeliger et al., 2017), the focus of the current  
1055 study was to compare the inherent codes already available in brain representations through statistical



1056 and computational feature extraction. In other words, we made no supervised adjustments to these  
1057 features to improve category-separable representations and extracted them directly from the time  
1058 series data. This is because, rather than trying to maximize the separability/decodeability of  
1059 representations across object categories, we mainly aimed at gaining insight into how the brain encodes  
1060 this information by determining which of the available statistical features could capture/detect these  
1061 codes. Accordingly, there might be supervised algorithms, particularly in the area of BCI, which can  
1062 provide higher decoding accuracies than those obtained from individual features of this study.  
1063 Moreover, if we had not reduced the dimensionality of the data for the multi-valued features for the  
1064 sake of comparison with single-valued features, the decoding performance would likely increase as it  
1065 has been the case in previous studies (Taghizadeh-Sarabi et al., 2015; Torabi et al., 2017).

1066

1067 There are several future directions for this research. One main question is how the results of this study  
1068 generalize to other cognitive processes such as attention, memory, decision making, etc. In other words,  
1069 it is interesting to know what the most informative features would be when decoding different  
1070 conditions in memory and attention tasks. Another interesting observation that we had in the current  
1071 study was that shorter time windows of signals (i.e. 5 ms) tended to provide larger initial (0 ms<t<200  
1072 ms) peaks in decoding compared to longer ones (i.e. 100 ms), while the latter provided higher decoding  
1073 values in later stages of the trial (t > 200; Supplementary Figure 2A). This was more pronounced for  
1074 Dataset 2, which had an active task and a longer presentation time. It suggests that, it could be the case  
1075 that initial stages of object category processing (e.g. extraction of visual features) takes a shorter time  
1076 spans, while later stages (e.g. association of visual information to categories or recurrence/feedback  
1077 processing) take longer time spans. Therefore, we might need a time-variable sliding window for  
1078 different stages of object recognition or any other cognitive processes to truly capture the temporal  
1079 dynamics of cognition. Another interesting extension to this work can be studying how (if at all) a  
1080 combination of the features used in this study could provide added information about object categories  
1081 and/or behavior. In other words, although all of the individual features evaluated here covered some  
1082 variance of category object information, to obtain the full variance of the actual neural code, we might  
1083 need to combine multiple features. To that end, we can combine the extracted features using a variety  
1084 of supervised and un-supervised methods as have previously provided additional information (Karimi  
1085 Rouzbahani et al., 2011; Qin et al., 2016). Finally, although explored to some extent (Hatamimajoumerd  
1086 et al., 2019), it can be interesting to look at specific time points and electrodes selected in our PCA-  
1087 based dimension reduction to see when and where in the brain the optimal neural codes were extracted  
1088 from.

1089

1090 The cross-dataset, large-scale analysis methods implemented in this study aligns with the growing trend  
1091 towards meta-analyses in cognitive neuroscience. Recent studies have also adopted and compared  
1092 several datasets to facilitate forming more rigorous conclusions about how the brain performs different  
1093 cognitive processes such as sustained attention (Langner et al., 2013) or working memory (Adam et al.,  
1094 2020). Our exploratory analysis presented here, has also the advantage that it was not biased towards  
1095 any of the findings. We simply compared sets of features from the EEG signals to see which one provides  
1096 more information about object categories and which one best explain behavior. The findings of this

1097 study provide generalizable insights into the most informative features of EEG signals in object category  
1098 processing.

## 1099 Acknowledgements

1100 This research was funded by UK Royal Society's Newton International Fellowship SUAI/059/G101116 to  
1101 H.K.R.

1102

## 1103 References

1104 Abootalebi, V., Moradi, M.H. and Khalilzadeh, M.A., 2009. A new approach for EEG feature extraction in  
1105 P300-based lie detection. *Computer methods and programs in biomedicine*, 94(1), pp.48-57.

1106 Aboy, M., Hornero, R., Abásolo, D. and Álvarez, D., 2006. Interpretation of the Lempel-Ziv complexity  
1107 measure in the context of biomedical signal analysis. *IEEE transactions on biomedical engineering*,  
1108 53(11), pp.2282-2288.

1109 Adam, K.C., Vogel, E.K. and Awh, E., 2020. Multivariate analysis reveals a generalizable human  
1110 electrophysiological signature of working memory load. *bioRxiv*.

1111 Ahmadi-Pajouh, M.A., Ala, T.S., Zamanian, F., Namazi, H. and Jafari, S., 2018. Fractal-based  
1112 classification of human brain response to living and non-living visual stimuli. *Fractals*, 26(05), p.1850069.

1113 Alimardani, F., Cho, J.H., Boostani, R. and Hwang, H.J., 2018. Classification of bipolar disorder and  
1114 schizophrenia using steady-state visual evoked potential based features. *IEEE Access*, 6, pp.40379-  
1115 40388.

1116 Bastos, A.M., Vezoli, J., Bosman, C.A., Schoffelen, J.M., Oostenveld, R., Dowdall, J.R., De Weerd, P.,  
1117 Kennedy, H. and Fries, P., 2015. Visual areas exert feedforward and feedback influences through distinct  
1118 frequency channels. *Neuron*, 85(2), pp.390-401.

1119 Behroozi, M., Daliri, M.R. and Shekarchi, B., 2016. EEG phase patterns reflect the representation of  
1120 semantic categories of objects. *Medical & biological engineering & computing*, 54(1), pp.205-221.

1121 Bizas, E., Simos, P.G., Stam, C.J., Arvanitis, S., Terzakis, D. and Micheloyannis, S., 1999. EEG  
1122 correlates of cerebral engagement in reading tasks. *Brain Topography*, 12(2), pp.99-105.

1123 Carlson, T., Tovar, D.A., Alink, A. and Kriegeskorte, N., 2013. Representational dynamics of object vision:  
1124 the first 1000 ms. *Journal of vision*, 13(10), pp.1-1.

1125 Celebrini, S., Thorpe, S., Trotter, Y. and Imbert, M., 1993. Dynamics of orientation coding in area V1 of  
1126 the awake primate. *Visual neuroscience*, 10(5), pp.811-825.

1127 Chan, A.M., Halgren, E., Marinkovic, K. and Cash, S.S., 2011. Decoding word and category-specific  
1128 spatiotemporal representations from MEG and EEG. *Neuroimage*, 54(4), pp.3028-3039.

1129 Churchland, M.M., Byron, M.Y., Cunningham, J.P., Sugrue, L.P., Cohen, M.R., Corrado, G.S., Newsome,  
1130 W.T., Clark, A.M., Hosseini, P., Scott, B.B. and Bradley, D.C., 2010. Stimulus onset quenches neural  
1131 variability: a widespread cortical phenomenon. *Nature neuroscience*, 13(3), pp.369-378.

1132 Cichy, R.M., Pantazis, D. and Oliva, A., 2014. Resolving human object recognition in space and  
1133 time. *Nature neuroscience*, 17(3), p.455.

1134 Contini, E.W., Wardle, S.G. and Carlson, T.A., 2017. Decoding the time-course of object recognition in  
1135 the human brain: From visual features to categorical decisions. *Neuropsychologia*, 105, pp.165-176.

- 1136 DiCarlo, J.J., Zoccolan, D. and Rust, N.C., 2012. How does the brain solve visual object recognition?  
1137 *Neuron*, 73(3), pp.415-434.
- 1138 Dienes, Z., 2014. Using Bayes to get the most out of non-significant results. *Frontiers in psychology*, 5,  
1139 p.781.
- 1140 Dobs, K., Isik, L., Pantazis, D. and Kanwisher, N., 2019. How face perception unfolds over time. *Nature*  
1141 *communications*, 10(1), pp.1-10.
- 1142 Duda, R.O., Hart, P.E. and Stork, D.G., 2012. Pattern classification. John Wiley & Sons.
- 1143 Eckhorn, R., Bauer, R., Jordan, W., Brosch, M., Kruse, W., Munk, M. and Reitboeck, H.J., 1988. Coherent  
1144 oscillations: A mechanism of feature linking in the visual cortex?. *Biological cybernetics*, 60(2), pp.121-  
1145 130.
- 1146 Gelman, A. and Tuerlinckx, F., 2000. Type S error rates for classical and Bayesian single and multiple  
1147 comparison procedures. *Computational Statistics*, 15(3), pp.373-390.
- 1148 Gelman, A., Hill, J. and Yajima, M., 2012. Why we (usually) don't have to worry about multiple  
1149 comparisons. *Journal of Research on Educational Effectiveness*, 5(2), pp.189-211.
- 1150 Gollisch, T. and Meister, M., 2008. Rapid neural coding in the retina with relative spike  
1151 latencies. *Science*, 319(5866), pp.1108-1111.
- 1152 Grootswagers, T., Cichy, R.M. and Carlson, T.A., 2018. Finding decodable information that can be read  
1153 out in behaviour. *NeuroImage*, 179, pp.252-262.
- 1154 Grootswagers, T., Robinson, A.K. and Carlson, T.A., 2019. The representational dynamics of visual  
1155 objects in rapid serial visual processing streams. *NeuroImage*, 188, pp.668-679.
- 1156 Grootswagers, T., Wardle, S.G. and Carlson, T.A., 2017. Decoding dynamic brain patterns from evoked  
1157 responses: A tutorial on multivariate pattern analysis applied to time series neuroimaging data. *Journal of*  
1158 *cognitive neuroscience*, 29(4), pp.677-697.
- 1159 Guo, L., Rivero, D., Seoane, J.A. and Pazos, A., 2009. Classification of EEG signals using relative  
1160 wavelet energy and artificial neural networks. In *Proceedings of the first ACM/SIGEVO Summit on*  
1161 *Genetic and Evolutionary Computation* (pp. 177-184).
- 1162 Hatamimajoumerd, E. and Talebpour, A., 2019. A Temporal neural trace of wavelet coefficients in human  
1163 object vision: an MEG study. *Frontiers in neural circuits*, 13, p.20.
- 1164 Hatamimajoumerd, E., Talebpour, A. and Mohsenzadeh, Y., 2019. Enhancing multivariate pattern  
1165 analysis for magnetoencephalography through relevant sensor selection. *International Journal of Imaging*  
1166 *Systems and Technology*.
- 1167 Haxby, J.V., Gobbini, M.I., Furey, M.L., Ishai, A., Schouten, J.L. and Pietrini, P., 2001. Distributed and  
1168 overlapping representations of faces and objects in ventral temporal cortex. *Science*, 293(5539), pp.2425-  
1169 2430.
- 1170 Haynes, J.D. and Rees, G., 2006. Decoding mental states from brain activity in humans. *Nature Reviews*  
1171 *Neuroscience*, 7(7), pp.523-534.
- 1172 Hebart, M.N. and Baker, C.I., 2018. Deconstructing multivariate decoding for the study of brain function.  
1173 *NeuroImage*, 180, pp.4-18.
- 1174 Higuchi, T., 1988. Approach to an irregular time series on the basis of the fractal theory. *Physica D:*  
1175 *Nonlinear Phenomena*, 31(2), pp.277-283.

- 1176 Hjorth, B., 1970. EEG analysis based on time domain properties. *Electroencephalography and clinical*  
1177 *neurophysiology*, 29(3), pp.306-310.
- 1178 Hung, C.P., Kreiman, G., Poggio, T. and DiCarlo, J.J., 2005. Fast readout of object identity from macaque  
1179 inferior temporal cortex. *Science*, 310(5749), pp.863-866.
- 1180 Intriligator, J. and Polich, J., 1995. On the relationship between EEG and ERP variability. *International*  
1181 *Journal of Psychophysiology*, 20(1), pp.59-74.
- 1182 Iranmanesh, S. and Rodriguez-Villegas, E., 2017. An ultralow-power sleep spindle detection system on  
1183 chip. *IEEE transactions on biomedical circuits and systems*, 11(4), pp.858-866.
- 1184 Isik, L., Meyers, E.M., Leibo, J.Z. and Poggio, T., 2014. The dynamics of invariant object recognition in  
1185 the human visual system. *Journal of neurophysiology*, 111(1), pp.91-102.
- 1186 Jadidi, A.F., Zargar, B.S. and Moradi, M.H., 2016, November. Categorizing visual objects; using ERP  
1187 components. In *2016 23rd Iranian Conference on Biomedical Engineering and 2016 1st International*  
1188 *Iranian Conference on Biomedical Engineering (ICBME)* (pp. 159-164). IEEE.
- 1189 Jeffreys, H., 1998. *The theory of probability*. OUP Oxford.
- 1190 Joshi, D., Panigrahi, B.K., Anand, S. and Santhosh, J., 2018. Classification of Targets and Distractors  
1191 Present in Visual Hemifields Using Time-Frequency Domain EEG Features. *Journal of healthcare*  
1192 *engineering*, 2018.
- 1193 Kaneshiro, B., Guimaraes, M.P., Kim, H.S., Norcia, A.M. and Suppes, P., 2015. A representational  
1194 similarity analysis of the dynamics of object processing using single-trial EEG classification. *Plos*  
1195 *one*, 10(8).
- 1196 Karimi Rouzbahani, H. and Daliri, M.R., 2011. Diagnosis of Parkinson's disease in human using voice  
1197 signals. *Basic and Clinical Neuroscience*, 2(3), pp.12-20.
- 1198 Karimi-Rouzbahani, H., 2018. Three-stage processing of category and variation information by entangled  
1199 interactive mechanisms of peri-occipital and peri-frontal cortices. *Scientific reports*, 8(1), pp.1-22.
- 1200 Karimi-Rouzbahani, H., Bagheri, N. and Ebrahimpour, R., 2017a. Average activity, but not variability, is  
1201 the dominant factor in the representation of object categories in the brain. *Neuroscience*, 346, pp.14-28.
- 1202 Karimi-Rouzbahani, H., Bagheri, N. and Ebrahimpour, R., 2017b. Hard-wired feed-forward visual  
1203 mechanisms of the brain compensate for affine variations in object recognition. *Neuroscience*, 349,  
1204 pp.48-63.
- 1205 Karimi-Rouzbahani, H., Bagheri, N. and Ebrahimpour, R., 2017c. Invariant object recognition is a  
1206 personalized selection of invariant features in humans, not simply explained by hierarchical feed-forward  
1207 vision models. *Scientific reports*, 7(1), pp.1-24.
- 1208 Karimi-Rouzbahani, H., Ramezani, F., Woolgar, A., Rich, A.N., Ghodrati, M., 2020a. Perceptual difficulty  
1209 modulates the direction of information flow in familiar face recognition.
- 1210 Karimi-Rouzbahani, H., Vahab, E., Ebrahimpour, R. and Menhaj, M.B., 2019. Spatiotemporal analysis of  
1211 category and target-related information processing in the brain during object detection. *Behavioural brain*  
1212 *research*, 362, pp.224-239.
- 1213 Karimi-Rouzbahani, H., Woolgar, A. and Rich, A.N., 2020b. Neural signatures of vigilance decrements  
1214 predict behavioural errors before they occur. *bioRxiv*.
- 1215 Katz, M.J., 1988. Fractals and the analysis of waveforms. *Computers in biology and medicine*, 18(3),  
1216 pp.145-156.

- 1217 Kiani, R., Esteky, H., Mirpour, K. and Tanaka, K., 2007. Object category structure in response patterns of  
1218 neuronal population in monkey inferior temporal cortex. *Journal of neurophysiology*, 97(6), pp.4296-4309.
- 1219 Kriegeskorte, N., Mur, M., Ruff, D.A., Kiani, R., Bodurka, J., Esteky, H., Tanaka, K. and Bandettini, P.A.,  
1220 2008. Matching categorical object representations in inferior temporal cortex of man and  
1221 monkey. *Neuron*, 60(6), pp.1126-1141.
- 1222 Langner, R. and Eickhoff, S.B., 2013. Sustaining attention to simple tasks: a meta-analytic review of the  
1223 neural mechanisms of vigilant attention. *Psychological bulletin*, 139(4), p.870.
- 1224 Le Van Quyen, M., Foucher, J., Lachaux, J.P., Rodriguez, E., Lutz, A., Martinerie, J. and Varela, F.J.,  
1225 2001. Comparison of Hilbert transform and wavelet methods for the analysis of neuronal synchrony.  
1226 *Journal of neuroscience methods*, 111(2), pp.83-98.
- 1227 Lee, M.D. and Wagenmakers, E.J., 2005. Bayesian statistical inference in psychology: Comment on  
1228 Trafimow (2003).
- 1229 Lempel, A. and Ziv, J., 1976. On the complexity of finite sequences. *IEEE Transactions on information*  
1230 *theory*, 22(1), pp.75-81.
- 1231 Liu, H., Agam, Y., Madsen, J.R. and Kreiman, G., 2009. Timing, timing, timing: fast decoding of object  
1232 information from intracranial field potentials in human visual cortex. *Neuron*, 62(2), pp.281-290.
- 1233 Majima, K., Matsuo, T., Kawasaki, K., Kawai, K., Saito, N., Hasegawa, I. and Kamitani, Y., 2014.  
1234 Decoding visual object categories from temporal correlations of ECoG signals. *Neuroimage*, 90, pp.74-83.
- 1235 Mazaheri, A. and Jensen, O., 2008. Asymmetric amplitude modulations of brain oscillations generate  
1236 slow evoked responses. *Journal of Neuroscience*, 28(31), pp.7781-7787.
- 1237 Miyakawa, N., Majima, K., Sawahata, H., Kawasaki, K., Matsuo, T., Kotake, N., Suzuki, T., Kamitani, Y.  
1238 and Hasegawa, I., 2018. Heterogeneous Redistribution of Facial Subcategory Information Within and  
1239 Outside the Face-Selective Domain in Primate Inferior Temporal Cortex. *Cerebral Cortex*, 28(4), pp.1416-  
1240 1431.
- 1241 Murphy, B., Poesio, M., Bovolo, F., Bruzzone, L., Dalponte, M. and Lakany, H., 2011. EEG decoding of  
1242 semantic category reveals distributed representations for single concepts. *Brain and language*, 117(1),  
1243 pp.12-22.
- 1244 Namazi, H., Ala, T.S. and Bakardjian, H., 2018. Decoding of steady-state visual evoked potentials by  
1245 fractal analysis of the electroencephalographic (EEG) signal. *Fractals*, 26(06), p.1850092.
- 1246 Norman, K.A., Polyn, S.M., Detre, G.J. and Haxby, J.V., 2006. Beyond mind-reading: multi-voxel pattern  
1247 analysis of fMRI data. *Trends in cognitive sciences*, 10(9), pp.424-430.
- 1248 Pincus, S.M. and Huang, W.M., 1992. Approximate entropy: statistical properties and  
1249 applications. *Communications in Statistics-Theory and Methods*, 21(11), pp.3061-3077.
- 1250 Pouryazdian, S. and Erfanian, A., 2009. Detection of steady-state visual evoked potentials for brain-  
1251 computer interfaces using PCA and high-order statistics. In *World Congress on Medical Physics and*  
1252 *Biomedical Engineering*, September 7-12, 2009, Munich, Germany (pp. 480-483). Springer, Berlin,  
1253 Heidelberg.
- 1254 Preißl, H., Lutzenberger, W., Pulvermüller, F. and Birbaumer, N., 1997. Fractal dimensions of short EEG  
1255 time series in humans. *Neuroscience letters*, 225(2), pp.77-80.
- 1256 Procaccia, I., 1988. Universal properties of dynamically complex systems: the organization of chaos.  
1257 *Nature*, 333(6174), pp.618-623.

- 1258 Pulini, A.A., Kerr, W.T., Loo, S.K. and Lenartowicz, A., 2019. Classification accuracy of neuroimaging  
1259 biomarkers in attention-deficit/hyperactivity disorder: Effects of sample size and circular analysis.  
1260 *Biological Psychiatry: Cognitive Neuroscience and Neuroimaging*, 4(2), pp.108-120.
- 1261 Qin, Y., Zhan, Y., Wang, C., Zhang, J., Yao, L., Guo, X., Wu, X. and Hu, B., 2016. Classifying four-  
1262 category visual objects using multiple ERP components in single-trial ERP. *Cognitive*  
1263 *neurodynamics*, 10(4), pp.275-285.
- 1264 Racine, R., 2011. Estimating the Hurst exponent. *Zurich: Mosaic Group*.
- 1265 Rasoulzadeh, V.E.S.A.L., Erkus, E.C., Yogurt, T.A., Ulusoy, I. and Zergeroğlu, S.A., 2017. A comparative  
1266 stationarity analysis of EEG signals. *Annals of Operations Research*, 258(1), pp.133-157.
- 1267 Richman, J.S. and Moorman, J.R., 2000. Physiological time-series analysis using approximate entropy  
1268 and sample entropy. *American Journal of Physiology-Heart and Circulatory Physiology*, 278(6),  
1269 pp.H2039-H2049.
- 1270 Ritchie, J.B., Tovar, D.A. and Carlson, T.A., 2015. Emerging object representations in the visual system  
1271 predict reaction times for categorization. *PLoS computational biology*, 11(6).
- 1272 Ression, B., Gauthier, I., Tarr, M.J., Despland, P., Bruyer, R., Linotte, S. and Crommelinck, M., 2000. The  
1273 N170 occipito-temporal component is delayed and enhanced to inverted faces but not to inverted objects:  
1274 an electrophysiological account of face-specific processes in the human brain. *Neuroreport*, 11(1), pp.69-  
1275 72.
- 1276 Rouder, J.N., Morey, R.D., Speckman, P.L. and Province, J.M., 2012. Default Bayes factors for ANOVA  
1277 designs. *Journal of Mathematical Psychology*, 56(5), pp.356-374.
- 1278 Rousselet, G.A., Husk, J.S., Bennett, P.J. and Sekuler, A.B., 2007. Single-trial EEG dynamics of object  
1279 and face visual processing. *Neuroimage*, 36(3), pp.843-862.
- 1280 Rupp, K., Roos, M., Milsap, G., Caceres, C., Ratto, C., Chevillet, M., Crone, N.E. and Wolmetz, M., 2017.  
1281 Semantic attributes are encoded in human electrocorticographic signals during visual object  
1282 recognition. *NeuroImage*, 148, pp.318-329.
- 1283 Sammer, G., 1999. Working memory load and EEG-dynamics as revealed by point correlation dimension  
1284 analysis. *International journal of psychophysiology*, 34(1), pp.89-102.
- 1285 Seeliger, K., Fritsche, M., Güçlü, U., Schoenmakers, S., Schoffelen, J.M., Bosch, S.E. and Van Gerven,  
1286 M.A.J., 2018. Convolutional neural network-based encoding and decoding of visual object recognition in  
1287 space and time. *NeuroImage*, 180, pp.253-266.
- 1288 Shourie, N., Firoozabadi, M. and Badie, K., 2014. Analysis of EEG signals related to artists and nonartists  
1289 during visual perception, mental imagery, and rest using approximate entropy. *BioMed research*  
1290 *international*, 2014.
- 1291 Simanova, I., Van Gerven, M., Oostenveld, R. and Hagoort, P., 2010. Identifying object categories from  
1292 event-related EEG: toward decoding of conceptual representations. *PloS one*, 5(12).
- 1293 Stam, C.J., 2000. Brain dynamics in theta and alpha frequency bands and working memory performance  
1294 in humans. *Neuroscience letters*, 286(2), pp.115-118.
- 1295 Stam, C.J., 2005. Nonlinear dynamical analysis of EEG and MEG: review of an emerging field. *Clinical*  
1296 *neurophysiology*, 116(10), pp.2266-2301.
- 1297 Stepien, R.A., 2002. Testing for non-linearity in EEG signal of healthy subjects. *Acta neurobiologiae*  
1298 *experimentalis*, 62(4), pp.277-282.

- 1299 Stewart, A.X., Nuthmann, A. and Sanguinetti, G., 2014. Single-trial classification of EEG in a visual object  
1300 task using ICA and machine learning. *Journal of neuroscience methods*, 228, pp.1-14.
- 1301 Storey, J.D., 2002. A direct approach to false discovery rates. *Journal of the Royal Statistical Society:*  
1302 *Series B (Statistical Methodology)*, 64(3), pp.479-498.
- 1303 Subha, D.P., Joseph, P.K., Acharya, R. and Lim, C.M., 2010. EEG signal analysis: a survey. *Journal of*  
1304 *medical systems*, 34(2), pp.195-212.
- 1305 Szczepański, J., Amigó, J.M., Wajnryb, E. and Sanchez-Vives, M.V., 2003. Application of Lempel–Ziv  
1306 complexity to the analysis of neural discharges. *Network: Computation in Neural Systems*, 14(2), pp.335-  
1307 350.
- 1308 Taghizadeh-Sarabi, M., Daliri, M.R. and Niksirat, K.S., 2015. Decoding objects of basic categories from  
1309 electroencephalographic signals using wavelet transform and support vector machines. *Brain*  
1310 *topography*, 28(1), pp.33-46.
- 1311 Tong, F. and Pratte, M.S., 2012. Decoding patterns of human brain activity. *Annual review of psychology*,  
1312 63, pp.483-509.
- 1313 Tononi, G. and Edelman, G.M., 1998. Consciousness and complexity. *Science*, 282(5395), pp.1846-  
1314 1851.
- 1315 Torabi, A., Jahromy, F.Z. and Daliri, M.R., 2017. Semantic category-based classification using nonlinear  
1316 features and wavelet coefficients of brain signals. *Cognitive Computation*, 9(5), pp.702-711.
- 1317 Tzovara, A., Murray, M.M., Plomp, G., Herzog, M.H., Michel, C.M. and De Lucia, M., 2012. Decoding  
1318 stimulus-related information from single-trial EEG responses based on voltage topographies. *Pattern*  
1319 *Recognition*, 45(6), pp.2109-2122.
- 1320 Van Gerven, M., Farquhar, J., Schaefer, R., Vlek, R., Geuze, J., Nijholt, A., Ramsey, N., Haselager, P.,  
1321 Vuurpijl, L., Gielen, S. and Desain, P., 2009. The brain–computer interface cycle. *Journal of neural*  
1322 *engineering*, 6(4), p.041001.
- 1323 Vaziri-Pashkam, M. and Xu, Y., 2017. Goal-directed visual processing differentially impacts human  
1324 ventral and dorsal visual representations. *Journal of Neuroscience*, 37(36), pp.8767-8782.
- 1325 Vidal, J.R., Ossandón, T., Jerbi, K., Dalal, S.S., Minotti, L., Rylvlin, P., Kahane, P. and Lachaux, J.P.,  
1326 2010. Category-specific visual responses: an intracranial study comparing gamma, beta, alpha, and ERP  
1327 response selectivity. *Frontiers in human neuroscience*, 4, p.195.
- 1328 Vidaurre, D., Myers, N.E., Stokes, M., Nobre, A.C. and Woolrich, M.W., 2019. Temporally unconstrained  
1329 decoding reveals consistent but time-varying stages of stimulus processing. *Cerebral Cortex*, 29(2),  
1330 pp.863-874.
- 1331 Voloh, B., Oemisch, M. and Womelsdorf, T., 2020. Phase of firing coding of learning variables across the  
1332 fronto-striatal network during feature-based learning. *Nature communications*, 11(1), pp.1-16.
- 1333 Wairagkar, M., Zoulias, I., Oguntosin, V., Hayashi, Y. and Nasuto, S., 2016, June. Movement intention  
1334 based Brain Computer Interface for Virtual Reality and Soft Robotics rehabilitation using novel  
1335 autocorrelation analysis of EEG. In 2016 6th IEEE International Conference on Biomedical Robotics and  
1336 Biomechatronics (BioRob) (pp. 685-685). IEEE.
- 1337 Wang, C., Xiong, S., Hu, X., Yao, L. and Zhang, J., 2012. Combining features from ERP components in  
1338 single-trial EEG for discriminating four-category visual objects. *Journal of neural engineering*, 9(5),  
1339 p.056013.

- 1340 Wang, Y., Wang, P. and Yu, Y., 2018. Decoding English alphaAlphabet letters using EEG phase  
1341 information. *Frontiers in neuroscience*, 12, p.62.
- 1342 Watrous, A.J., Deuker, L., Fell, J. and Axmacher, N., 2015. Phase-amplitude coupling supports phase  
1343 coding in human ECoG. *Elife*, 4, p.e07886.
- 1344 Williams, M.A., Dang, S. and Kanwisher, N.G., 2007. Only some spatial patterns of fMRI response are  
1345 read out in task performance. *Nature neuroscience*, 10(6), pp.685-686.
- 1346 Wong, K.F.K., Galka, A., Yamashita, O. and Ozaki, T., 2006. Modelling non-stationary variance in EEG  
1347 time series by state space GARCH model. *Computers in biology and medicine*, 36(12), pp.1327-1335.
- 1348 Woolgar, A., Dermody, N., Afshar, S., Williams, M.A. and Rich, A.N., 2019. Meaningful patterns of  
1349 information in the brain revealed through analysis of errors. *bioRxiv*, p.673681.
- 1350 Zellner, A. and Siow, A., 1980. Posterior odds ratios for selected regression hypotheses. *Trabajos de*  
1351 *estadística y de investigación operativa*, 31(1), pp.585-603.
- 1352



# Figures:

*Hamid Karimi-Rouzbahani et al., “Temporal codes provide additional category-related information in object category decoding: a systematic comparison between informative EEG features”.*

## Figure 1

### Dataset 1: paradigm

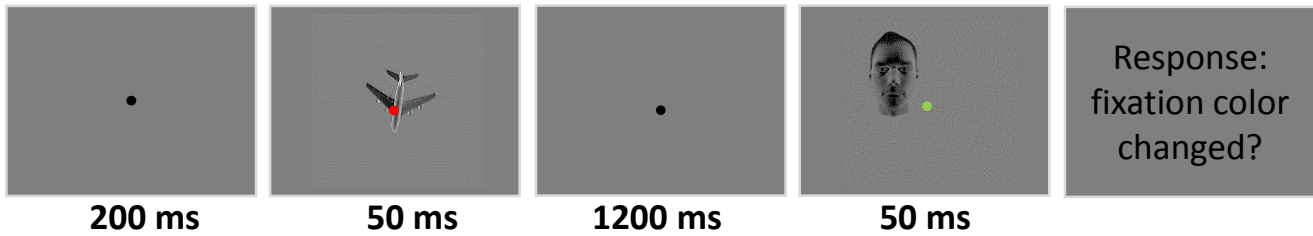

### Dataset 2: paradigm

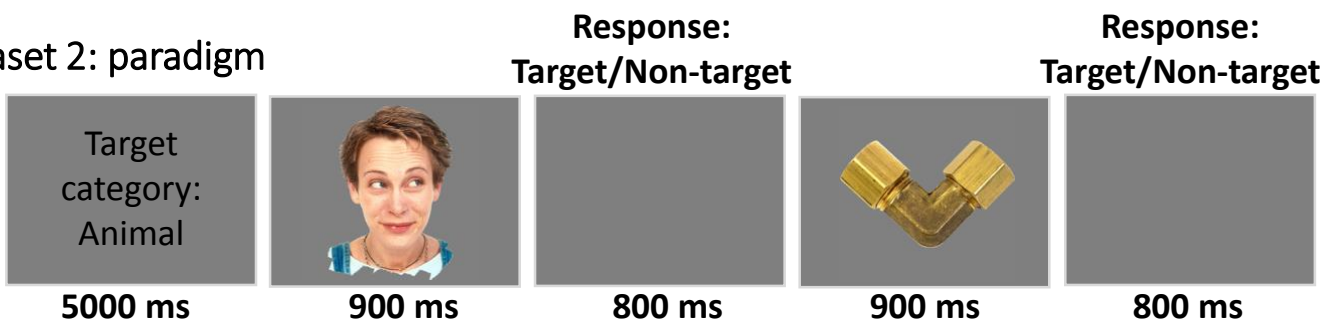

### Dataset 3: paradigm

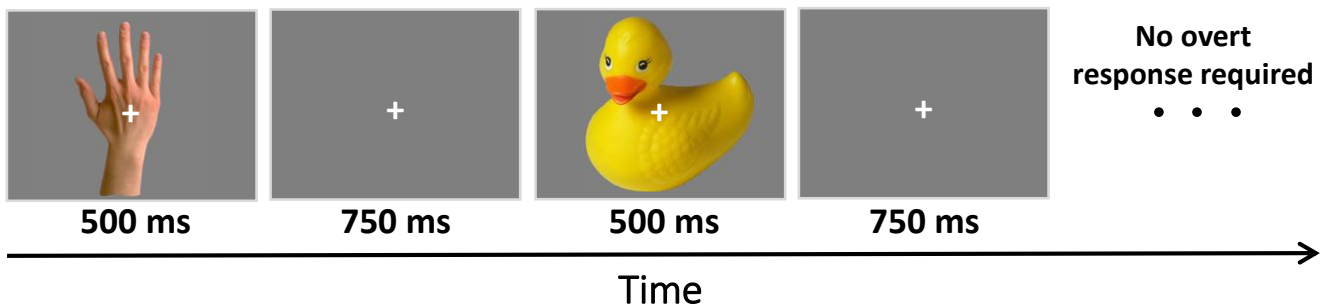

**Figure 2**

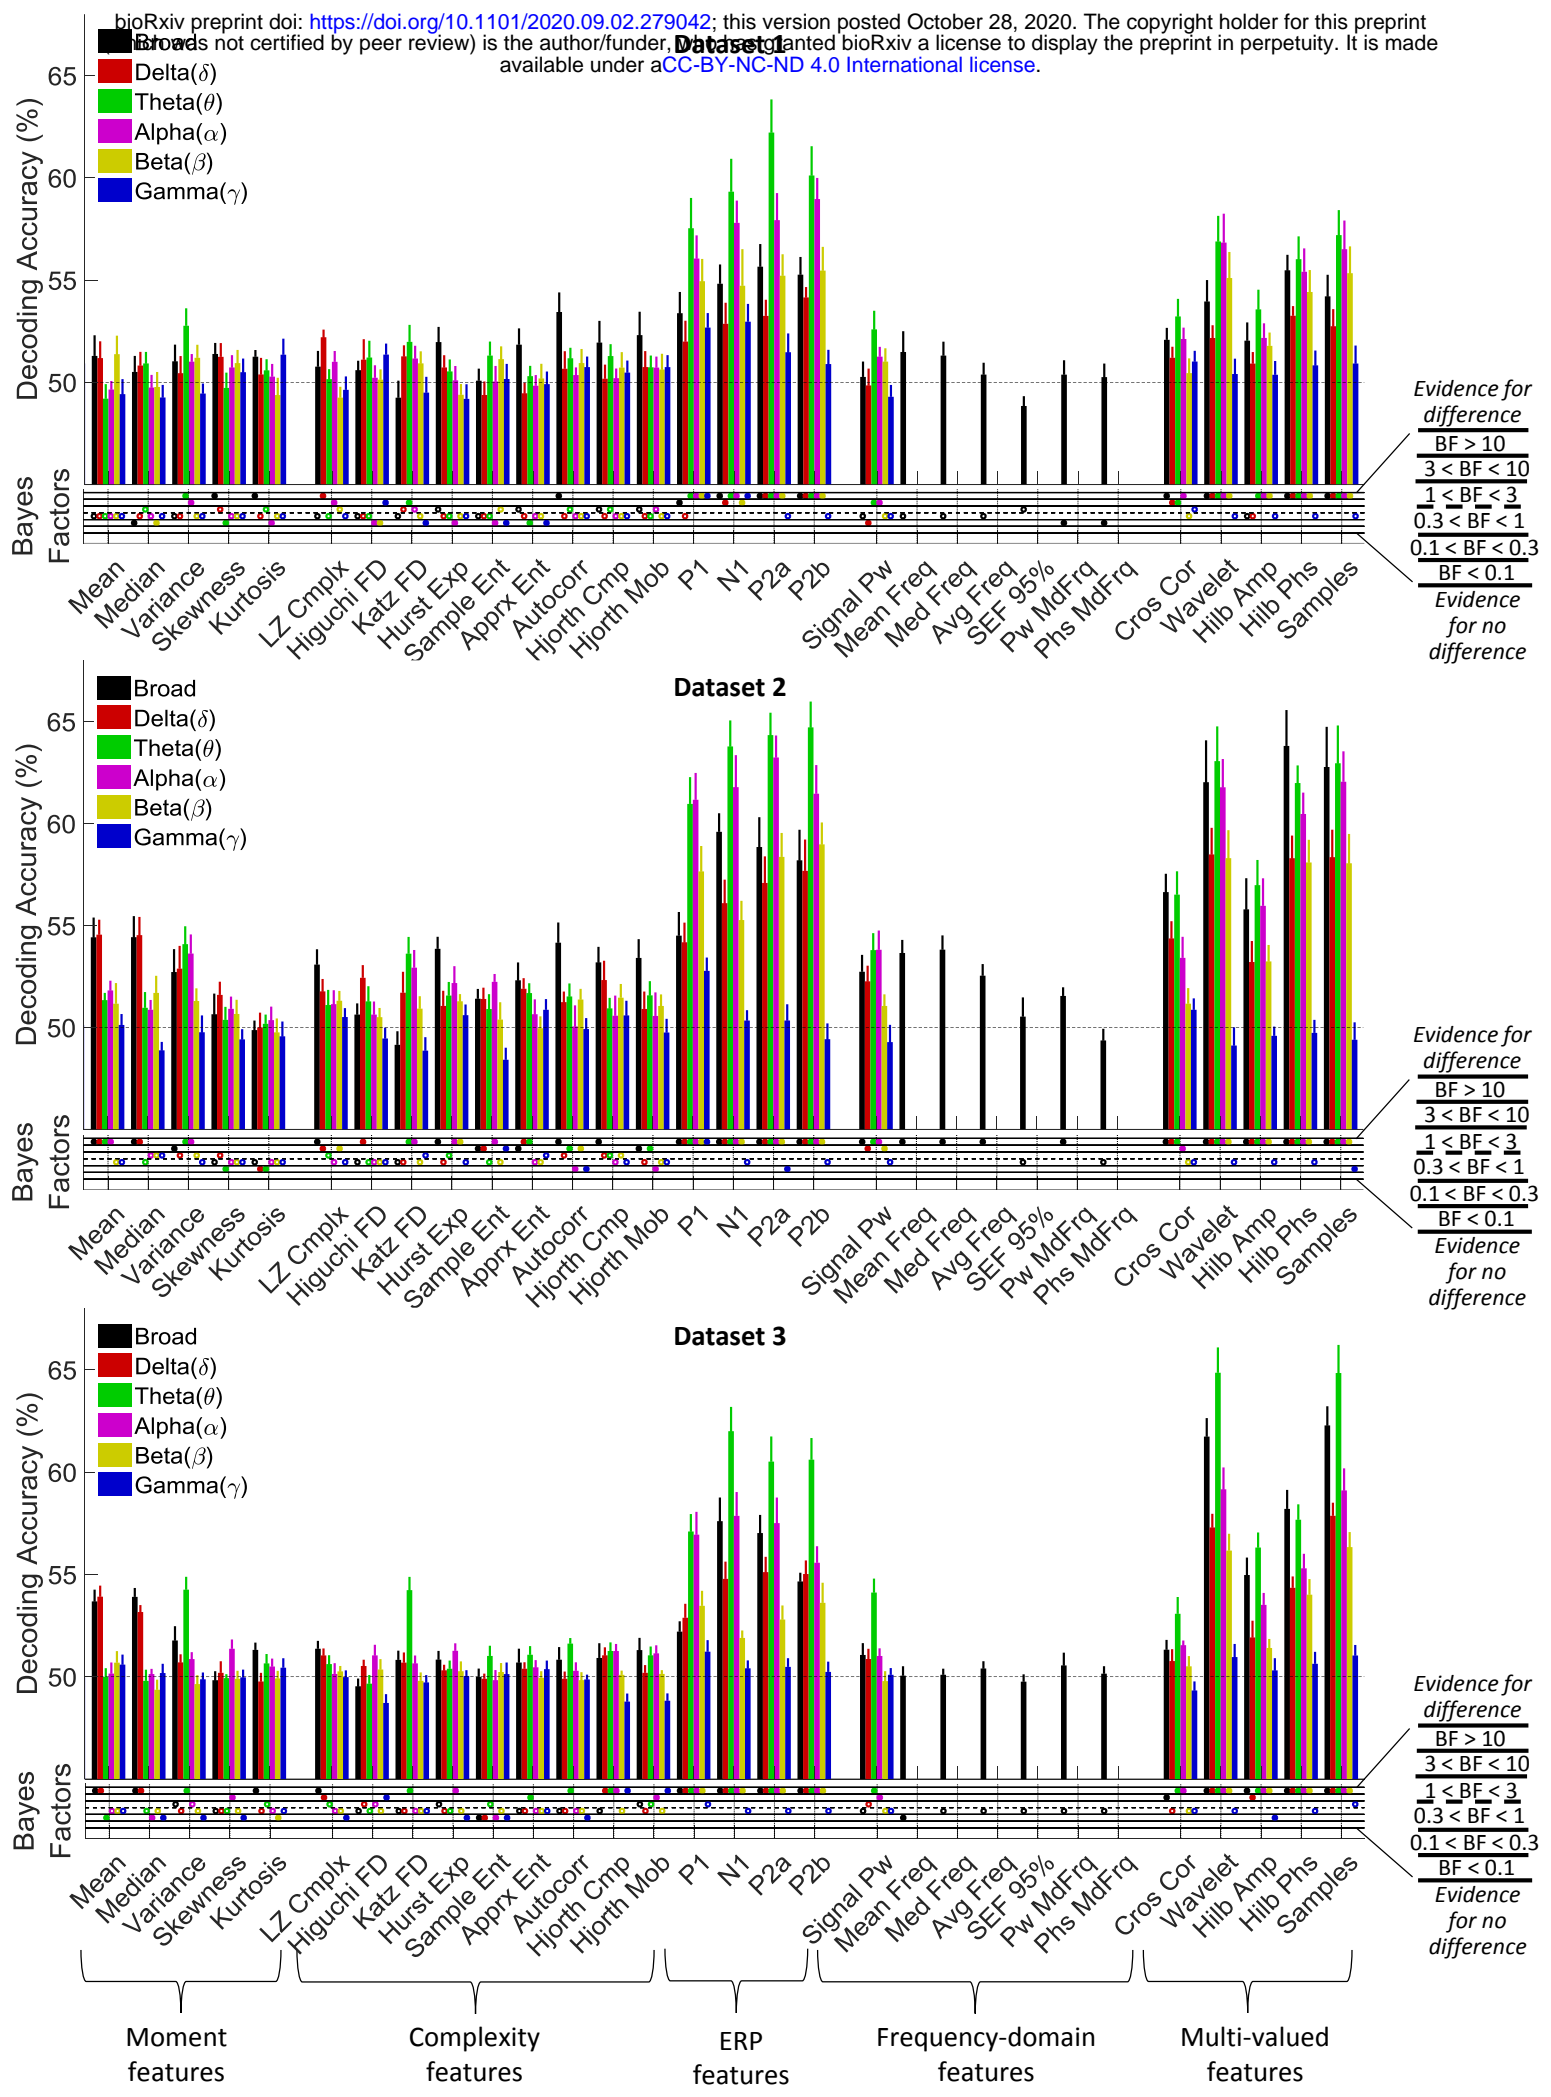

Figure 3

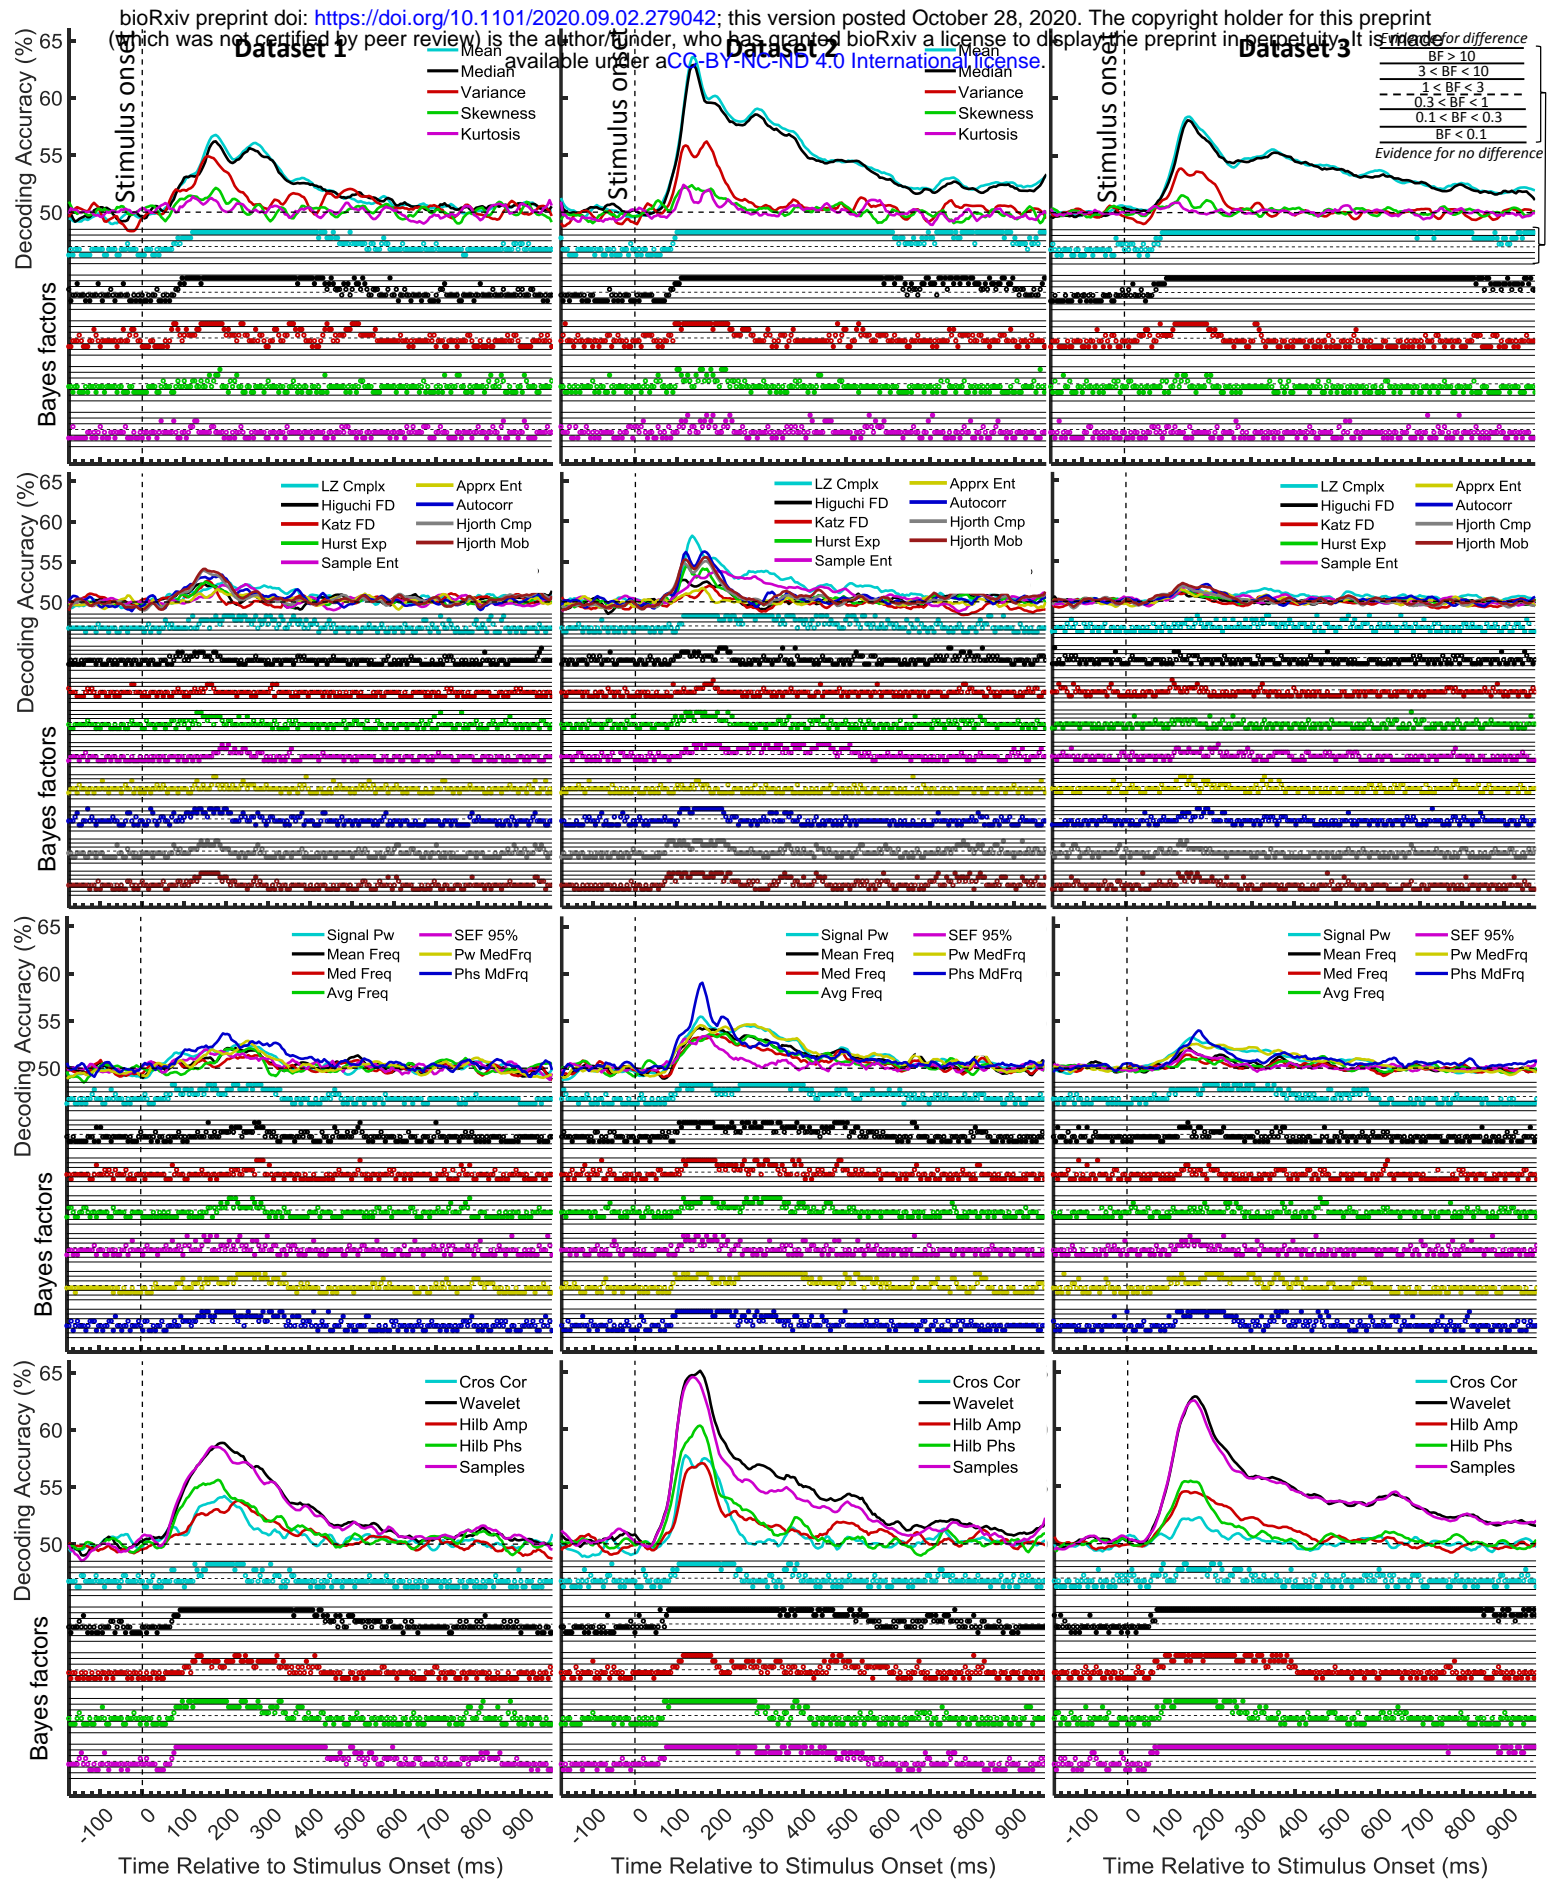

# Figure 4

bioRxiv preprint doi: <https://doi.org/10.1101/2020.09.02.279042>; this version posted October 28, 2020. The copyright holder for this preprint (which was not certified by peer review) is the author/funder, who has granted bioRxiv a license to display the preprint in perpetuity. It is made available under aCC-BY-NC-ND 4.0 International license.

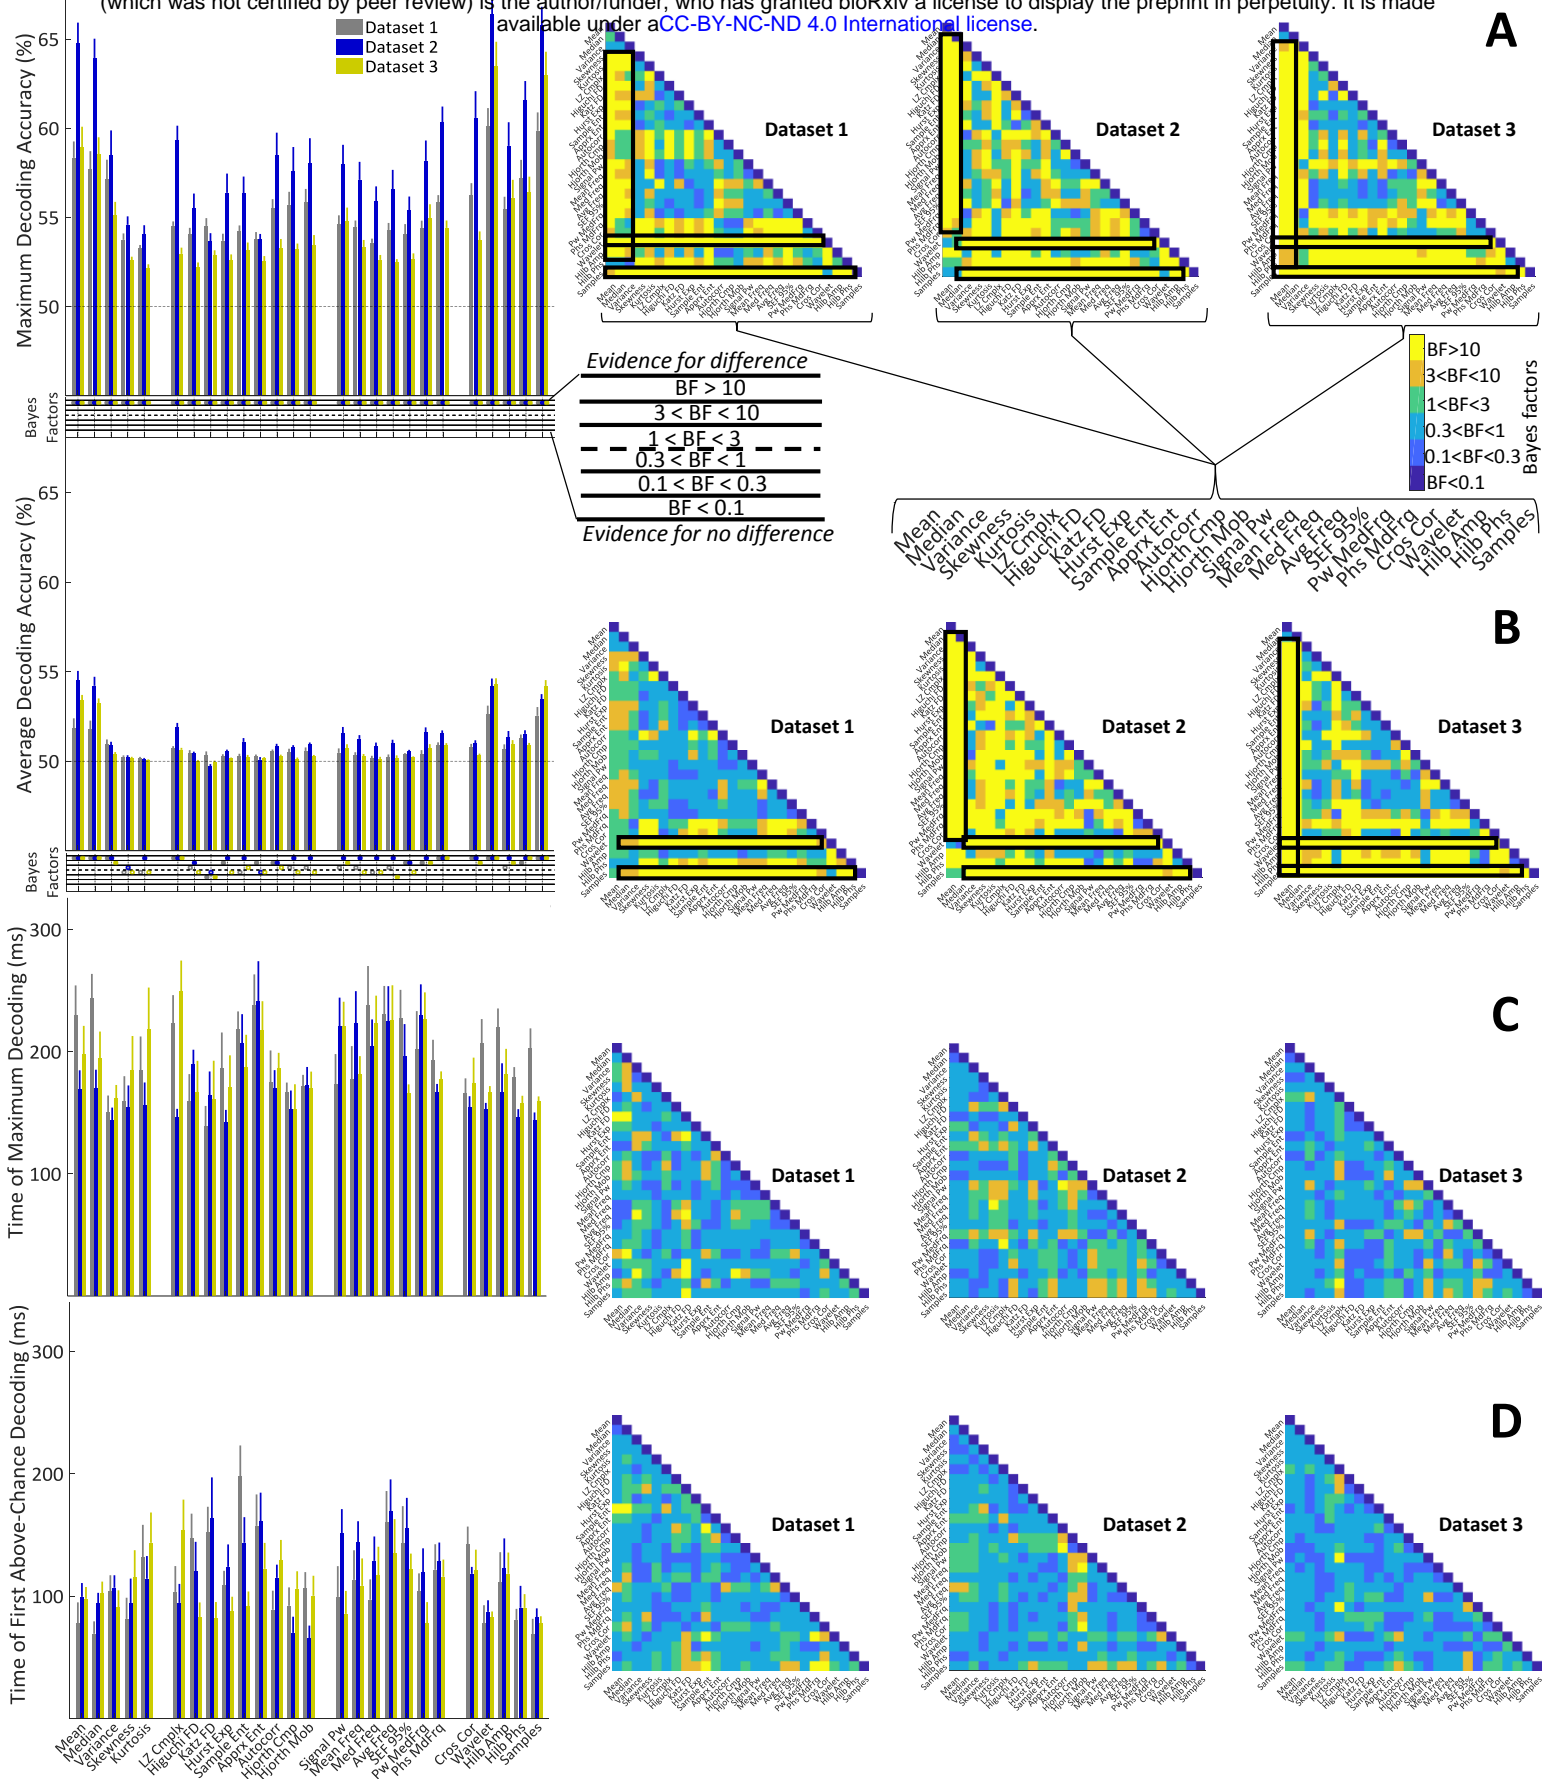

# Figure 5

bioRxiv preprint doi: <https://doi.org/10.1101/2020.09.02.279042>; this version posted October 28, 2020. The copyright holder for this preprint (which was not certified by peer review) is the author/funder, who has granted bioRxiv a license to display the preprint in perpetuity. It is made available under aCC-BY-NC-ND 4.0 International license.

**A**

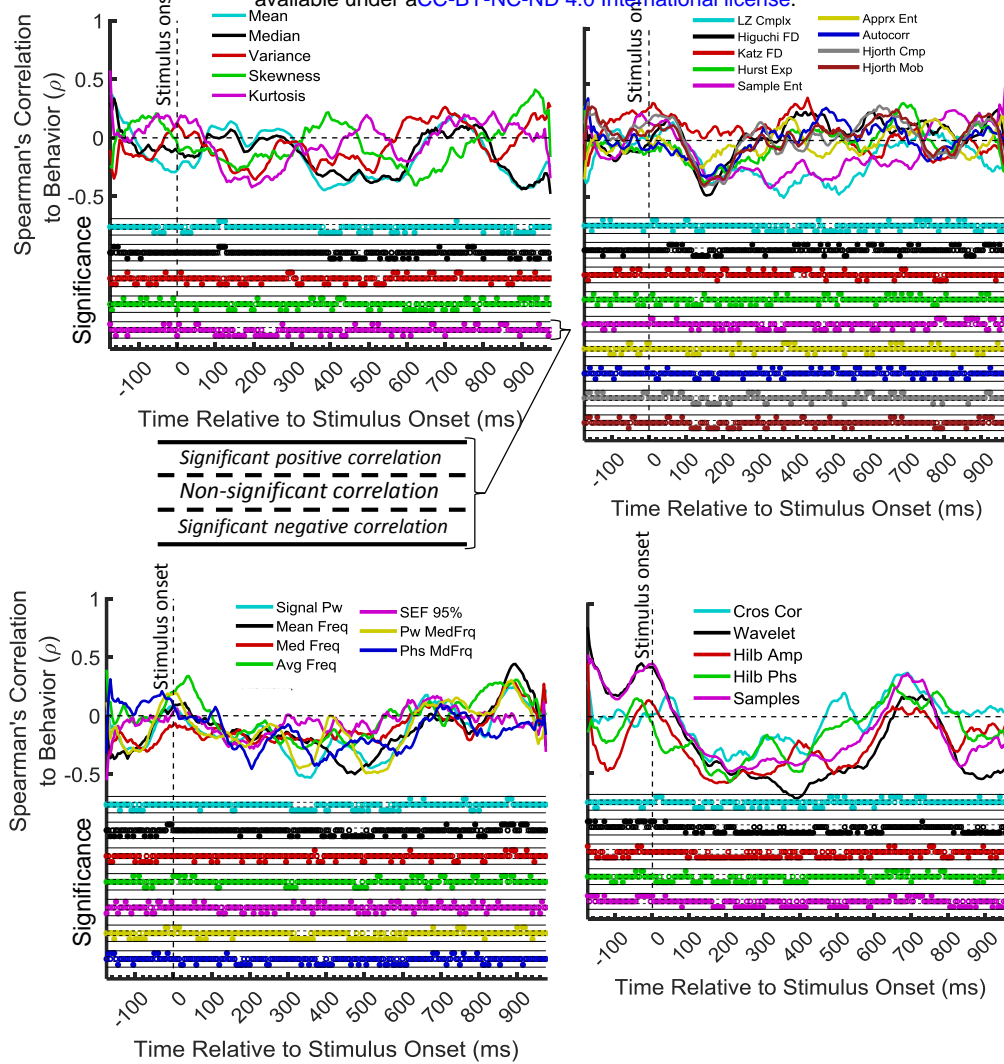

**B**

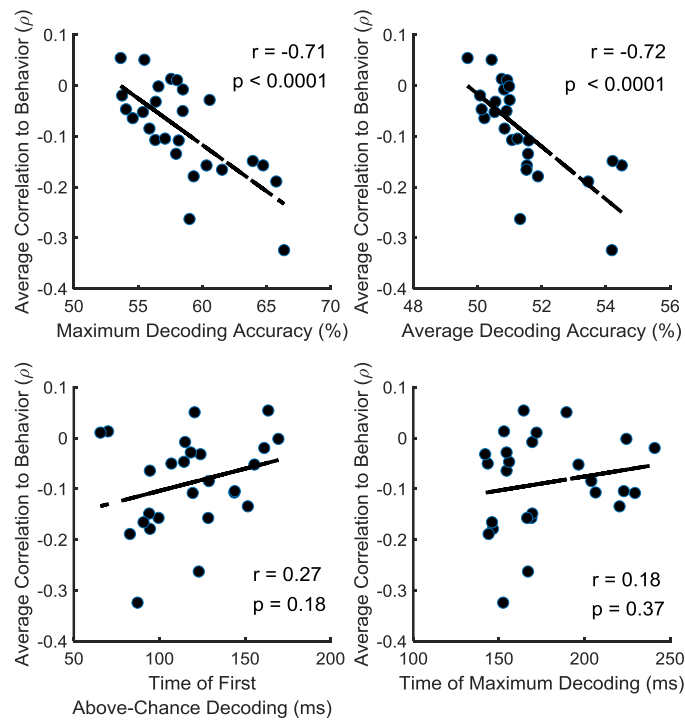

# Supplementary Materials:

*Hamid Karimi-Rouzbahani et al., “Temporal codes provide additional category-related information in object category decoding: a systematic comparison between informative EEG features”.*

# Supplementary Figure 1

(A) Bayes factor matrices comparing the whole-trial decoding results across different features for each frequency band and dataset separately. Matrices show different levels of evidence for existing difference (moderate  $3 < BF < 10$ , Orange; strong  $BF > 10$ , Yellow), no difference (moderate  $0.1 < BF < 0.3$ , light blue; strong  $BF < 0.1$ , dark blue) or insufficient evidence ( $1 < BF < 3$  green;  $0.3 < BF < 1$  Cyan) for either hypotheses. Black and red boxes show moderate or strong evidence for higher decoding values for specific features compared as explained in the text. For example, for Dataset 1, there is insufficient evidence for difference between decoding values of most features in the Gamma band as indicated by the light blue color in most cells. However, there is moderate to strong evidence that Mean and Median features are different from N1 and P1 as indicated by yellow color and the decoding accuracies in Figure 2. (B) Bayes factor matrices comparing the whole-trial decoding results across different frequency bands for each feature and dataset separately. Black and red boxes show moderate or strong evidence for higher decoding values for specific features compared as explained in the text.

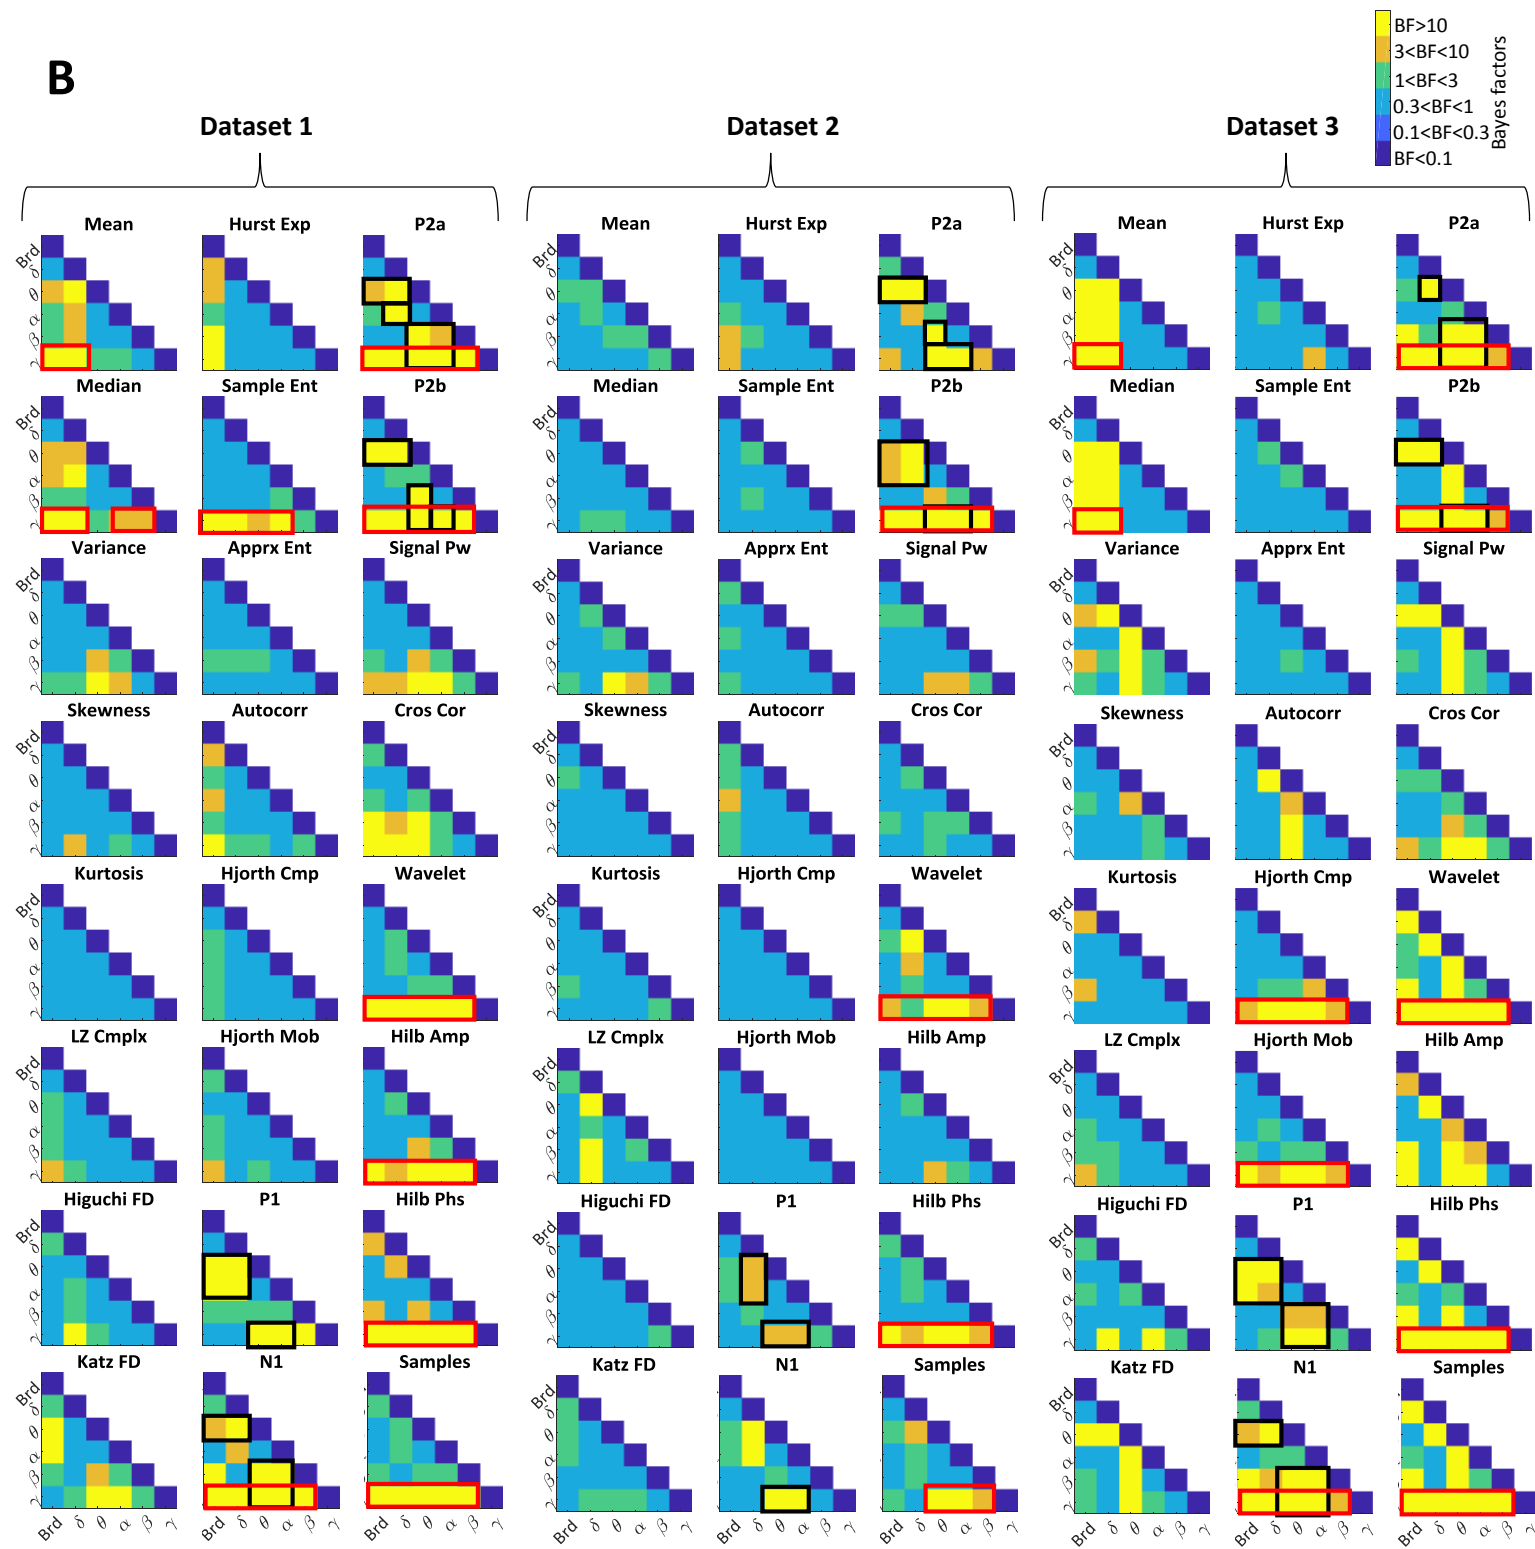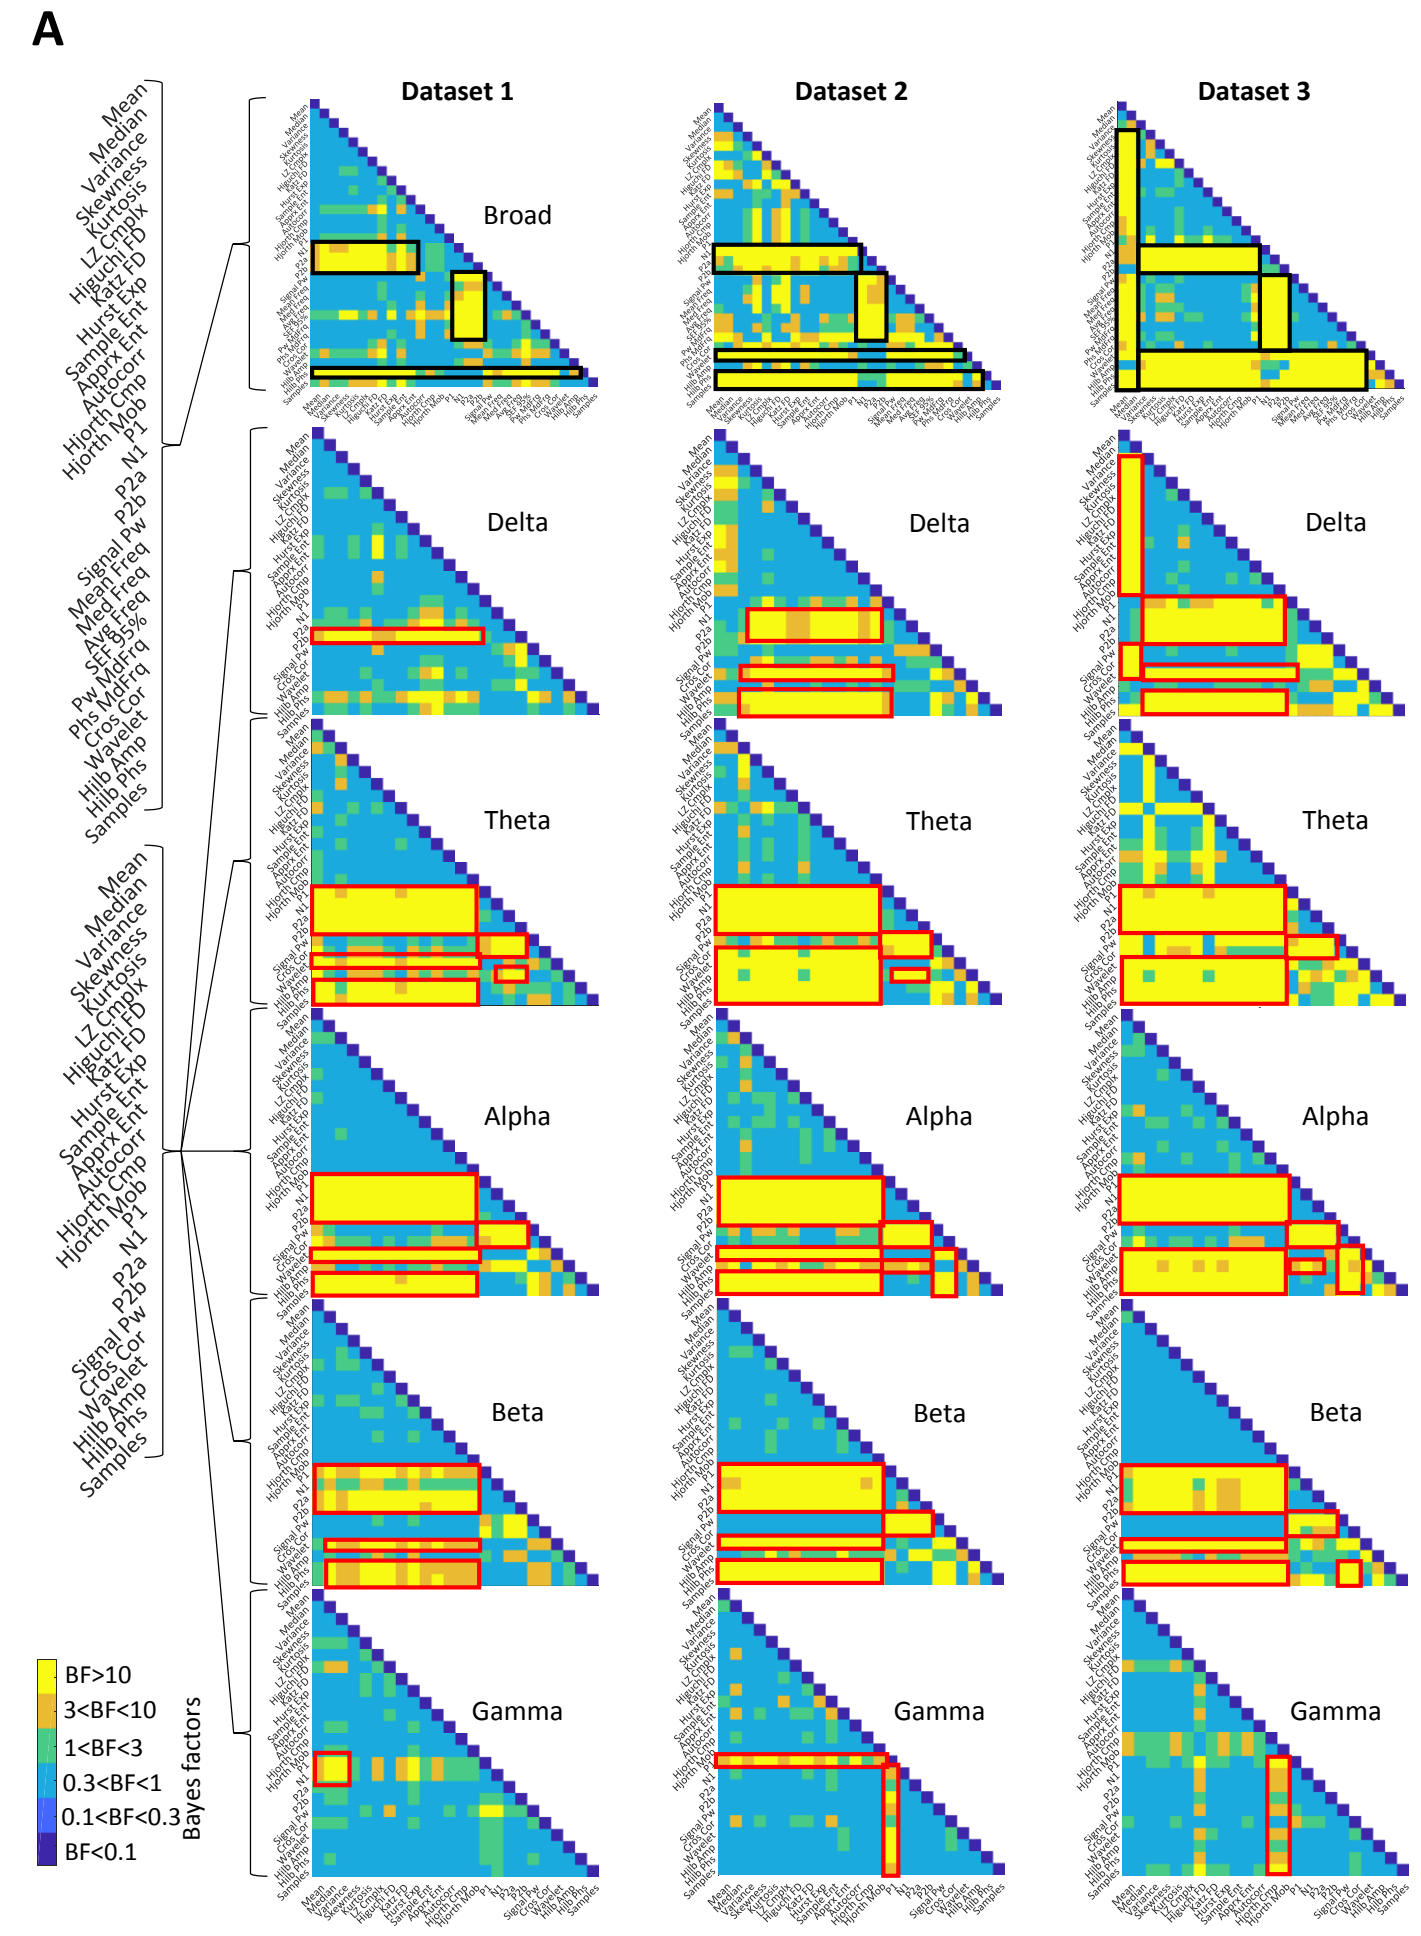



## Supplementary Text 2

We selected the window length of 50 ms for our time-resolved analyses because it was neither too long to hide the true temporal dynamics of information processing in the brain, nor too short to avoid the accurate calculation of sample-dependent (e.g. complexity and multi-valued) features. To assure that we did not miss the true obtainable dynamic range (amplitude) of accuracies, we compared category decoding obtained from time windows of 5 (i.e. which was the case in most previous studies all of which relied on signals' mean (Grootswagers et al., 2017; Karimi-Rouzbahani et al., 2017b) and 100 ms with that used here from 50 ms time windows. Consistently across the three datasets, results showed that the highest decoding accuracies were obtained for the 50 ms time windows, both in terms of maximum and average decoding accuracy after the stimulus onset. Interestingly, lengthening the time windows decreased the maximum decoding but increased the decoding accuracies in the later stages of the processing (i.e. from 200 ms onwards; probably after initial hard-wired processing of visual stimuli). This may suggest that later stages of category processing (probably involving feedback/recurrent processing; which are activated by the longer presentation time in datasets 2 and 3), take longer processing times, therefore captured better using longer time windows.

## Supplementary Figure 2

(A) Comparison of decoding accuracies using different length for the sliding time window. The bottom section shows the Bayes factor evidence for the difference between the 50 ms window and the other two window lengths. (B) Comparison of decoding accuracies using different frequency bands for the Mean (top) and Wavelet (bottom) features. Each column shows the results for one dataset. Top section in each panel shows the decoding accuracies across time and the horizontal dashed lines on the top panel refer to chance-level decoding. Filled circles in the Bayes Factors show moderate/strong evidence for either difference or no difference between the decoding curves and empty circles indicate insufficient evidence for either hypotheses. Thick lines show the average decoding accuracy across participants (error bars Standard Error across participants).

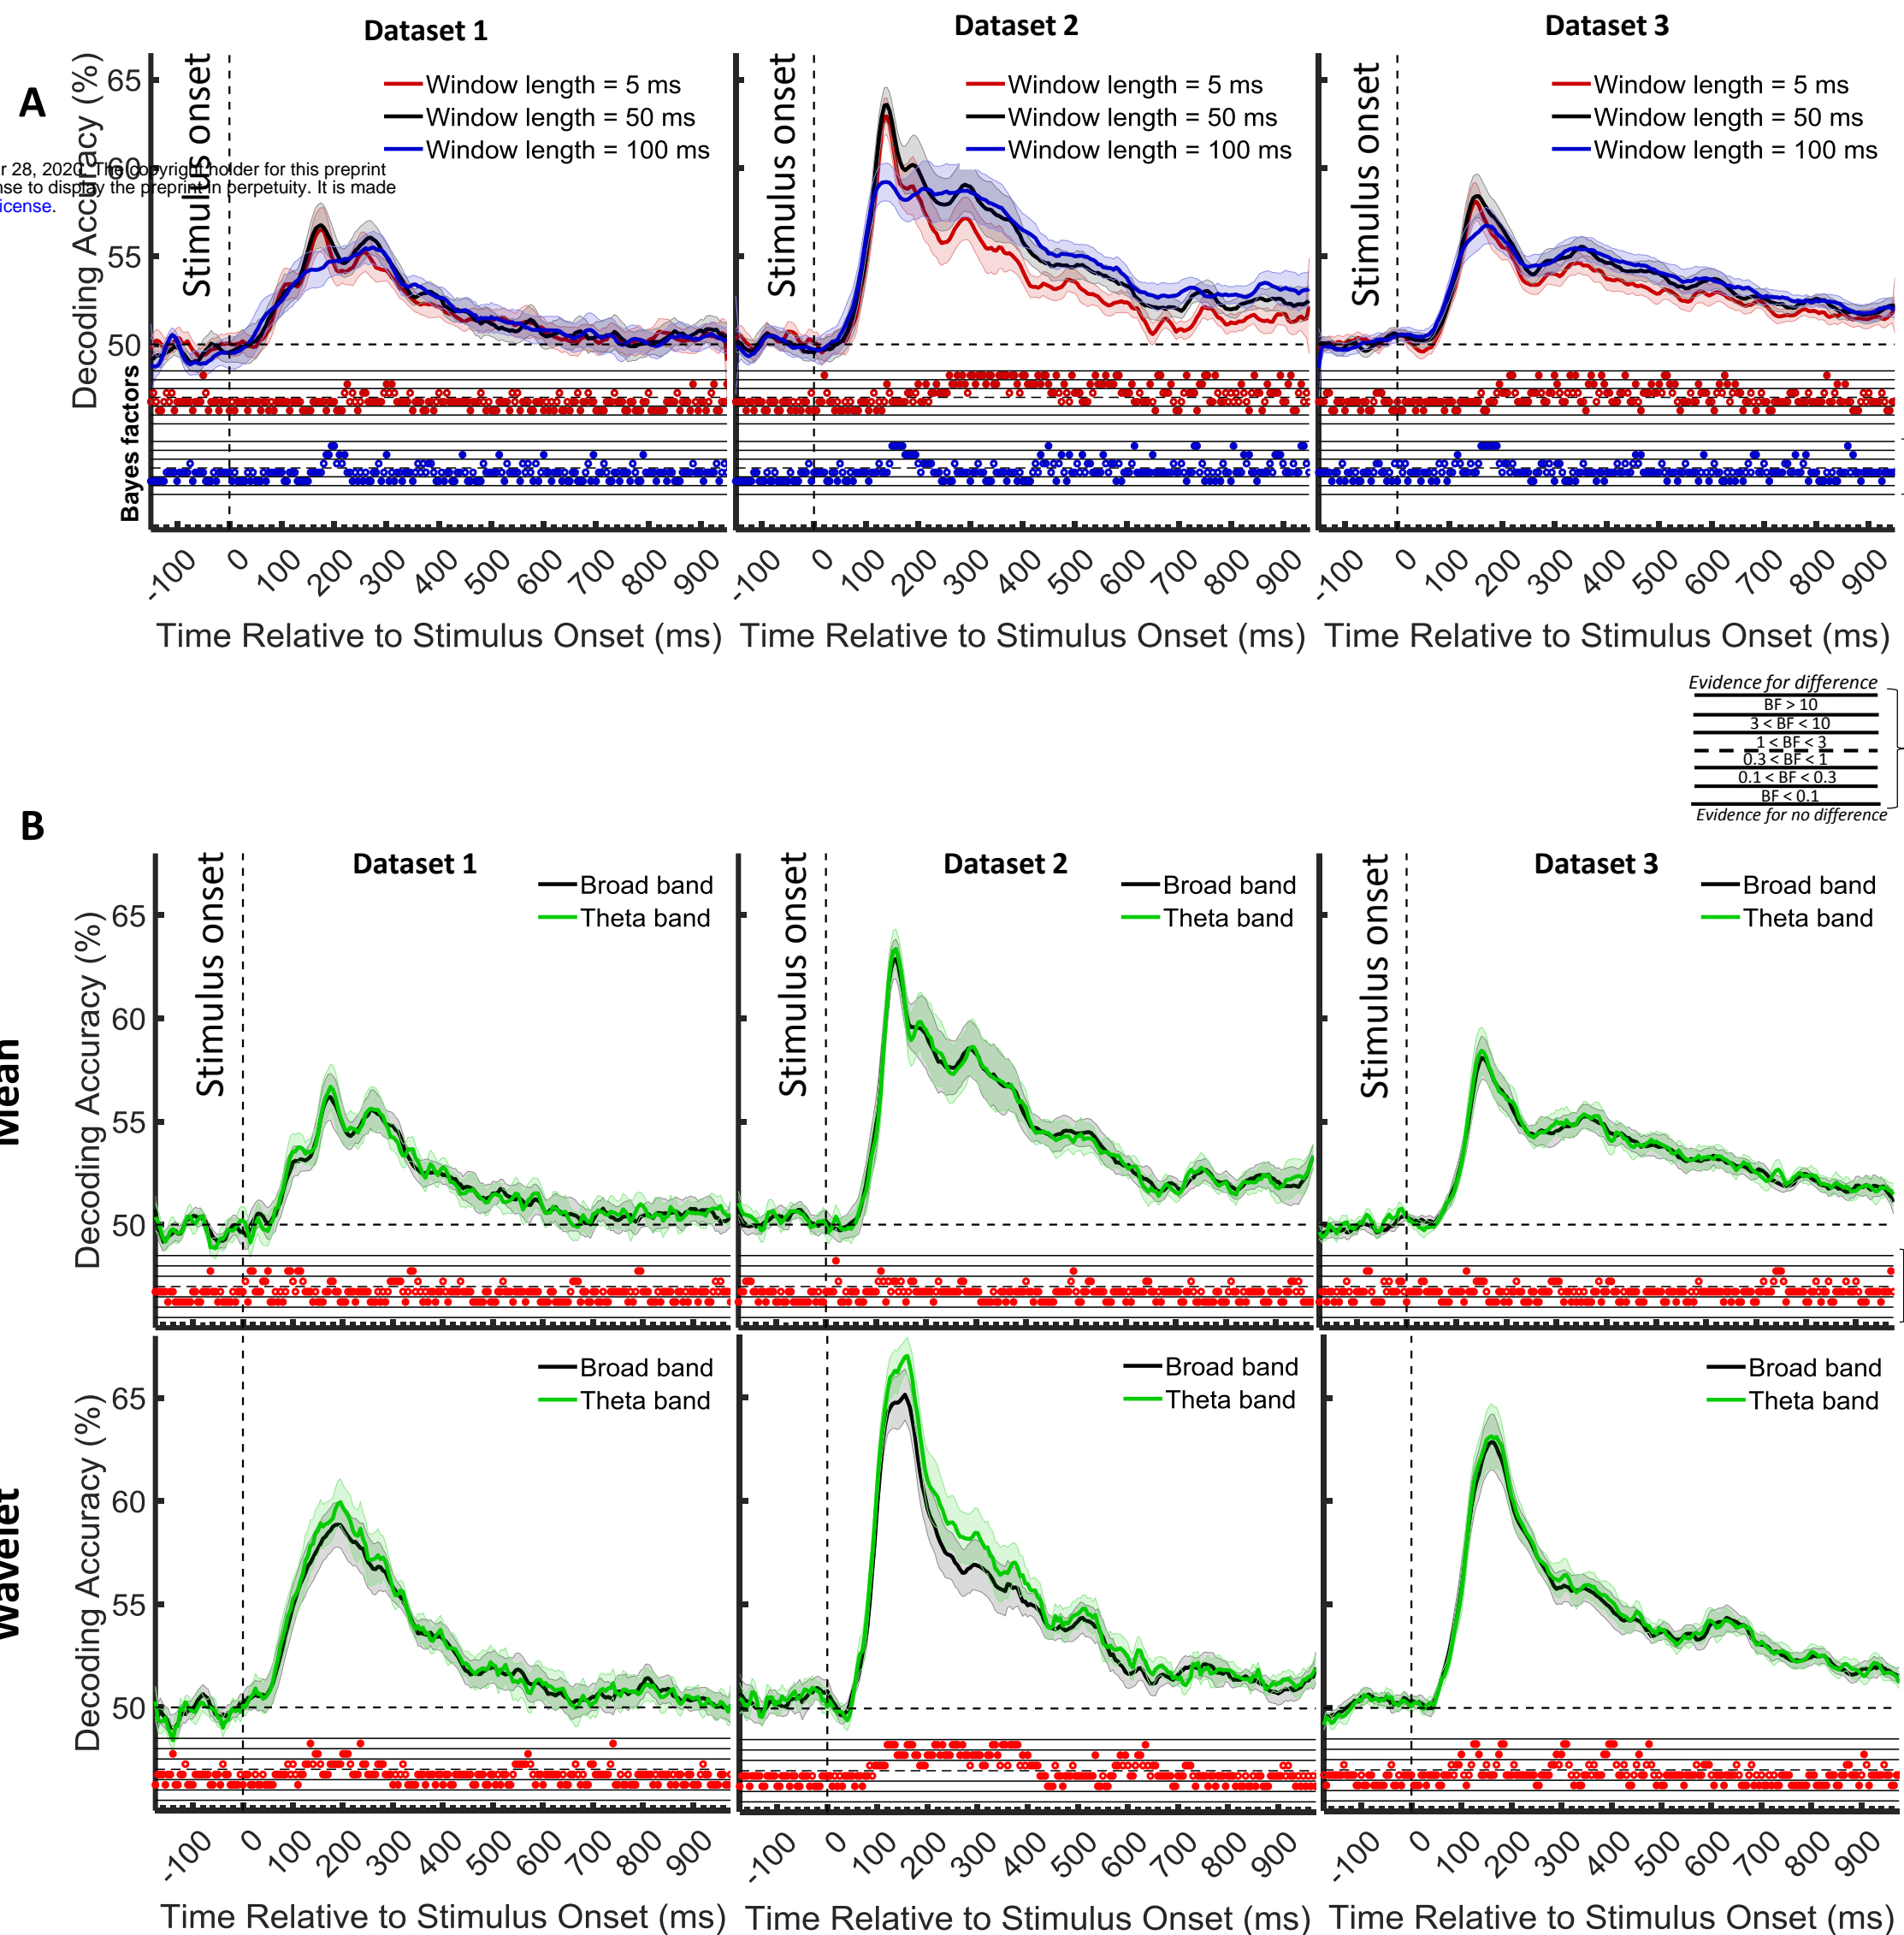

## Supplementary Text 3

The amplitude parameters of maximum and average decoding showed relatively similar patterns across features. This seemed to be the case for the timing parameters of the time of maximum and the time of first above-chance decoding values too. To quantitatively see if there was any correlation within the amplitude and timing parameters, we calculated their correlations across features and for each dataset separately. Results showed significant correlation (Pearson's  $r > 0.9$ ,  $p < 0.01$ ) between maximum and average decoding values across the features and for all three datasets. There was also significant (Pearson's  $r > 0.5$ ,  $p < 0.05$ ) correlation between the time of first above-chance and maximum decoding for datasets 2 and 3, but not for dataset 1 ( $r = 0.02$ ,  $p = 0.93$ ), which might have been because of the lower decoding values in dataset 1 compared to the other datasets making the correlations noisier.

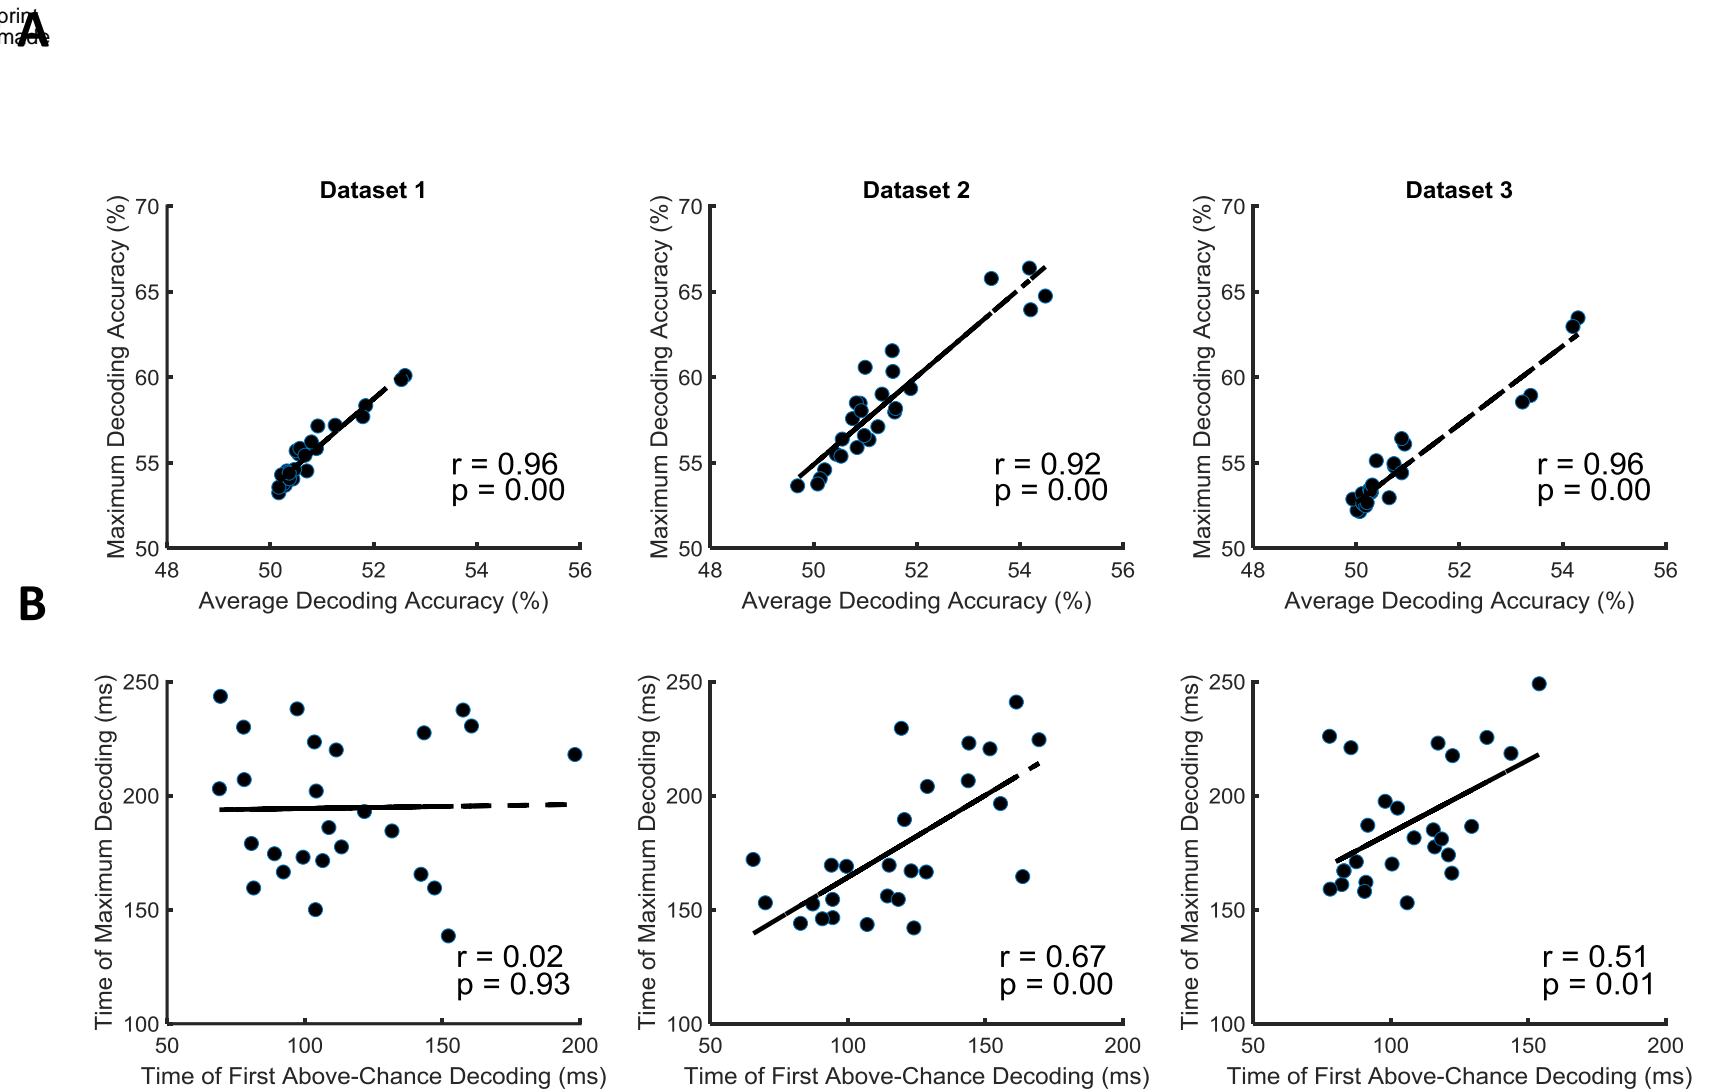

## Supplementary Figure 3

Correlation between the pairs of amplitude (A) and timing (B) parameters of the time-resolved decoding (i.e. maximum and average decoding accuracy and time of first and maximum decoding) for the set of  $N=26$  individual features. The slant line shows the best linear fit to the distribution of the correlation data.
